# Supplementary material for: Spectra–Structure Correlations in Isotopomers of Ethanol (CX3CX2OX; X = H, D): Combined Near-Infrared and Anharmonic Computational Study
Source: PubMed Central journal article supplement (PMC6600318; doi:10.3390/molecules24112189), 2019-06-11
Supplement: molecules-24-02189-s001.pdf [file molecules-24-02189-s001.pdf]

*Supplementary Materials*

# **Spectra–Structure Correlations in Isotopomers of Ethanol ( $CX_3CX_2OX$ ; $X = H, D$ ): Combined Near-Infrared and Anharmonic Computational Study**

**Krzysztof B. Beć <sup>1,2,\*</sup>, Justyna Grabska <sup>1</sup>, Christian W. Huck <sup>1</sup>, and Mirosław A. Czarnecki <sup>2</sup>**

<sup>1</sup> Institute of Analytical Chemistry and Radiochemistry, Leopold-Franzens University, Innrain 80/82, CCB-Center for Chemistry and Biomedicine, 6020-Innsbruck, Austria; Justyna.Grabska@uibk.ac.at (J.G.); Christian.W.Huck@uibk.ac.at (C.W.H.)

<sup>2</sup> Faculty of Chemistry, University of Wrocław, F. Joliot-Curie 14, 50-383 Wrocław, Poland; mirosław.czarnecki@chem.uni.wroc.pl

\* Correspondence: Krzysztof.Bec@uibk.ac.at; Tel.: +43-512-507-5783

I. Figures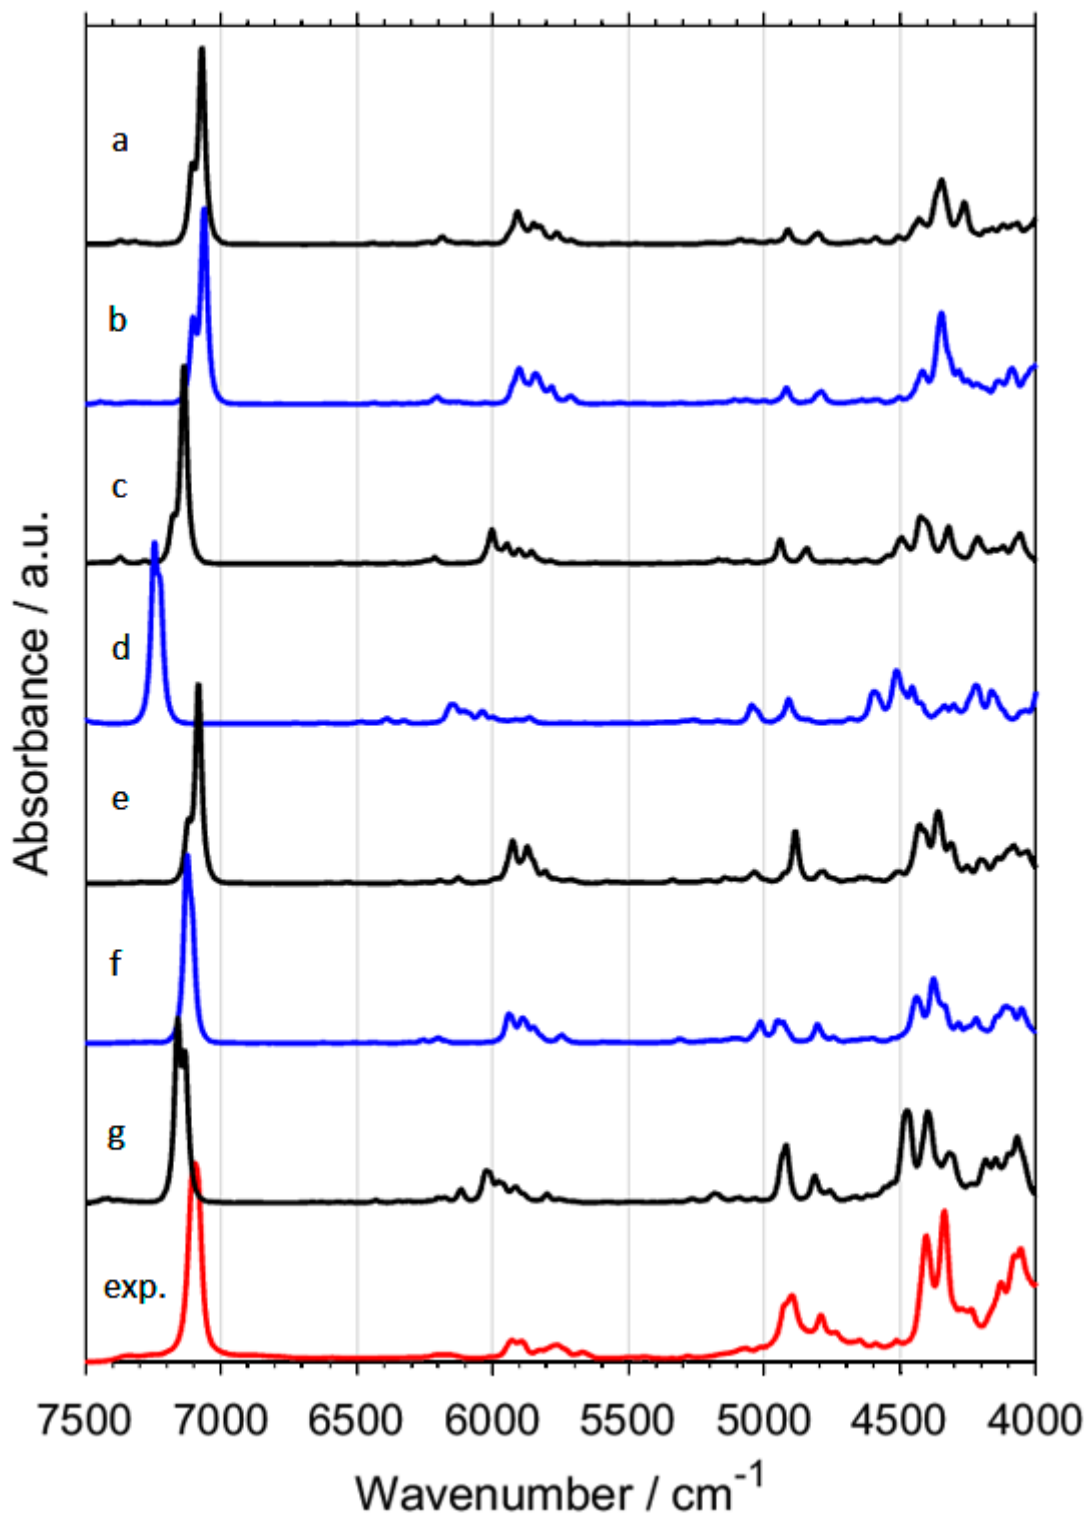

Figure S1. NIR spectra of  $\text{CH}_3\text{CD}_2\text{OH}$  calculated with GVPT2 method at different levels of electronic theory; (a) B3LYP-GD3BJ/6-31G(d,p); (b) B3LYP-GD3BJ/6-31G(d,p)//CPCM; (c) B2PLYP-GD3BJ/6-31G(d,p)//CPCM; (d) MP2/6-31G(d,p)//CPCM; (e) B3LYP-GD3BJ/SNST//CPCM; (f) B2PLYP-GD3BJ/def2-TZVP//CPCM; (g) MP2/aug-cc-pVTZ//CPCM. Experimental spectrum (exp.) of  $\text{CH}_3\text{CD}_2\text{OH}$  in  $\text{CCl}_4$  (0.1 M).

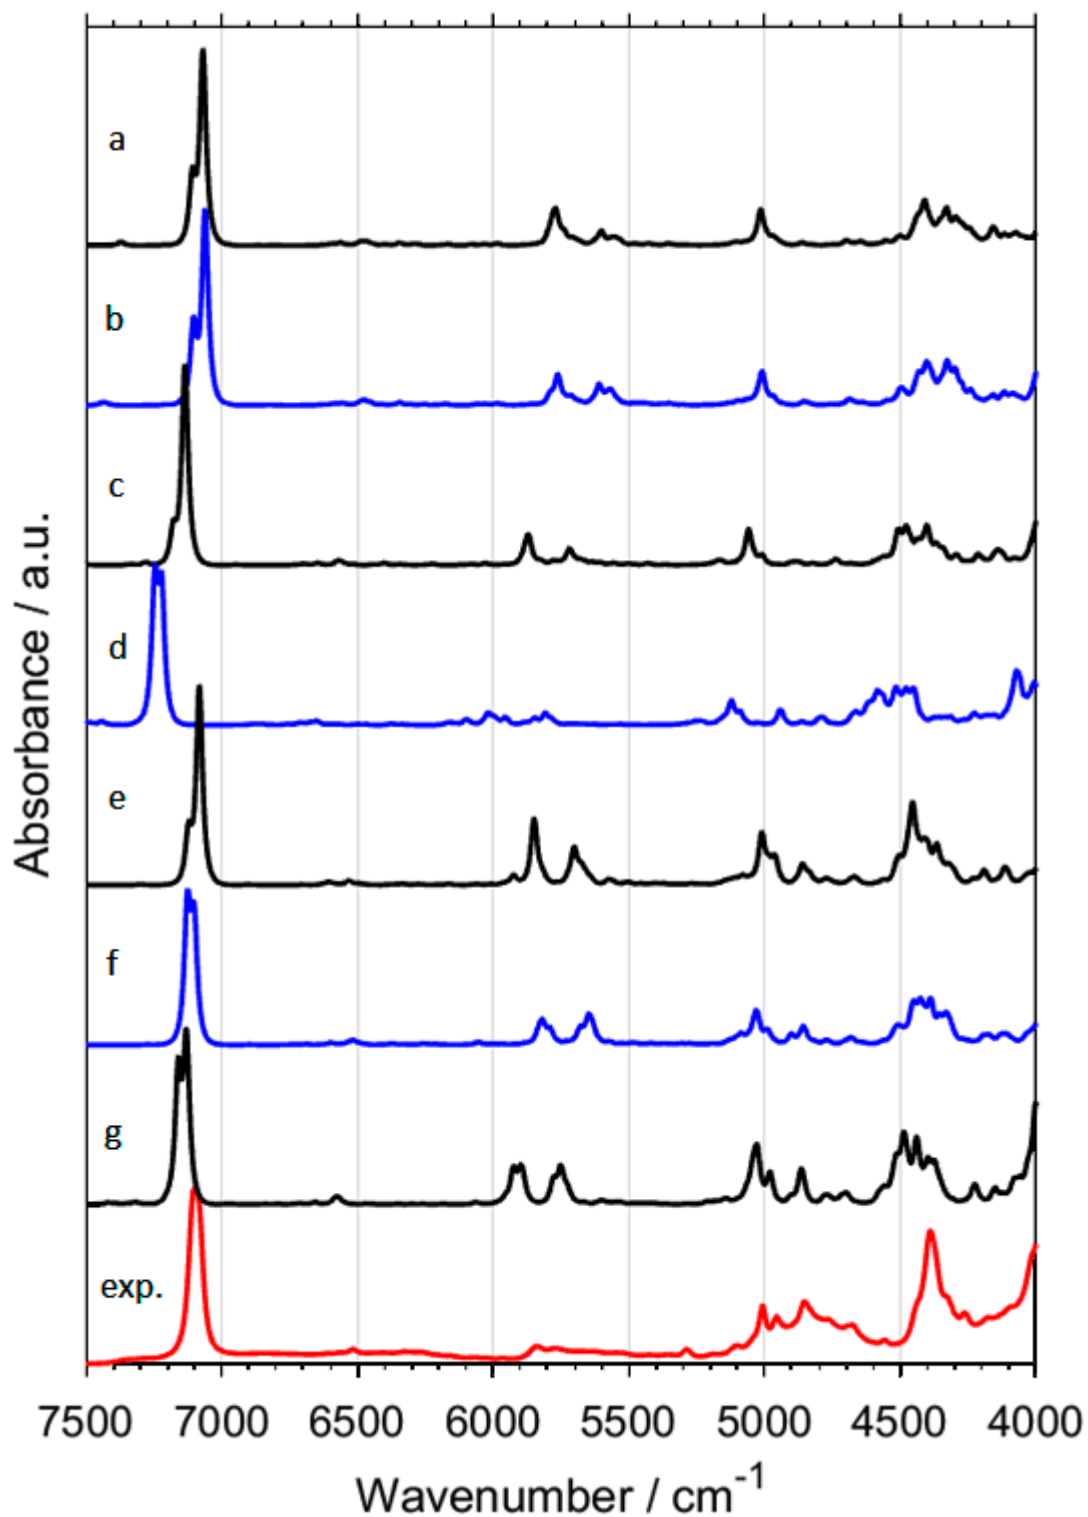

Figure S2. NIR spectra of  $\text{CD}_3\text{CH}_2\text{OH}$  calculated with GVPT2 method at different levels of electronic theory; (a) B3LYP-GD3BJ /6-31G(d,p); (b) B3LYP-GD3BJ /6-31G(d,p)//CPCM; (c) B2PLYP-GD3BJ/6-31G(d,p)//CPCM; (d) MP2/6-31G(d,p)//CPCM; (e) B3LYP-GD3BJ/SNST//CPCM; (f) B2PLYP-GD3BJ/def2-TZVP//CPCM; (g) MP2/aug-cc-pVTZ//CPCM. Experimental spectrum (exp.) of  $\text{CD}_3\text{CH}_2\text{OH}$  in  $\text{CCl}_4$  (0.1 M).

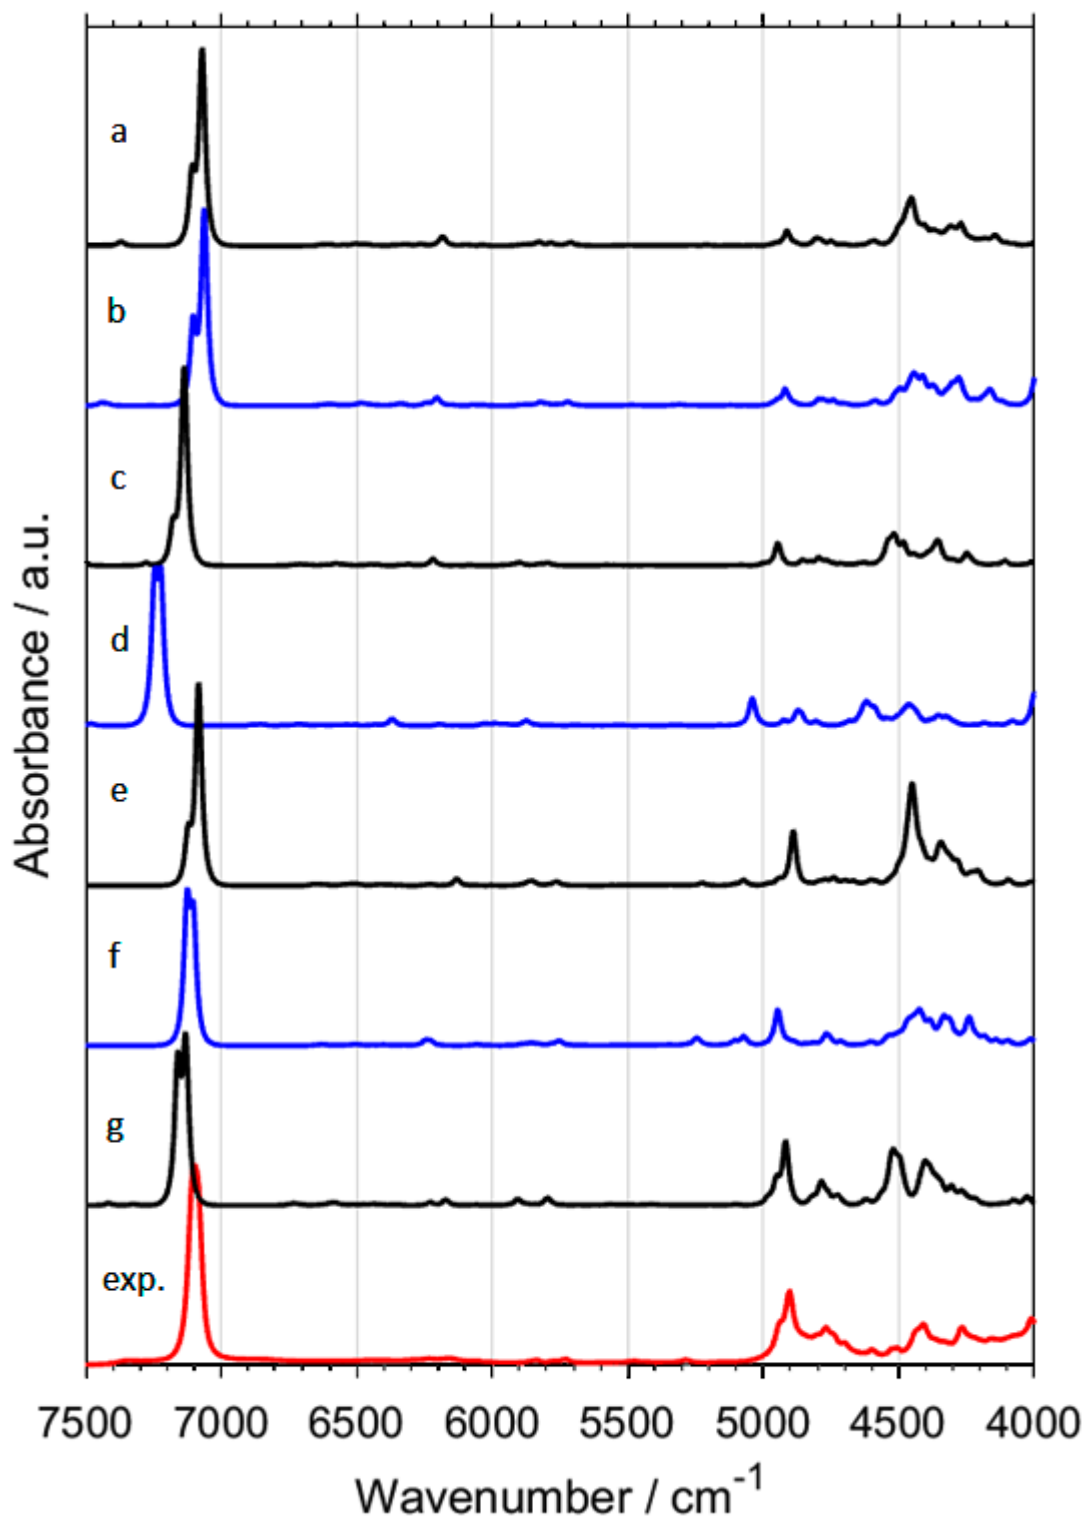

Figure S3. NIR spectra of  $\text{CD}_3\text{CD}_2\text{OH}$  calculated with GVPT2 method at different levels of electronic theory; (a) B3LYP-GD3BJ /6-31G(d,p); (b) B3LYP-GD3BJ /6-31G(d,p)//CPCM; (c) B2PLYP-GD3BJ/6-31G(d,p)//CPCM; (d) MP2/6-31G(d,p)//CPCM; (e) B3LYP-GD3BJ/SNST//CPCM; (f) B2PLYP-GD3BJ/def2-TZVP//CPCM; (g) MP2/aug-cc-pVTZ//CPCM. Experimental spectrum (exp.) of  $\text{CD}_3\text{CD}_2\text{OH}$  in  $\text{CCl}_4$  (0.1 M).

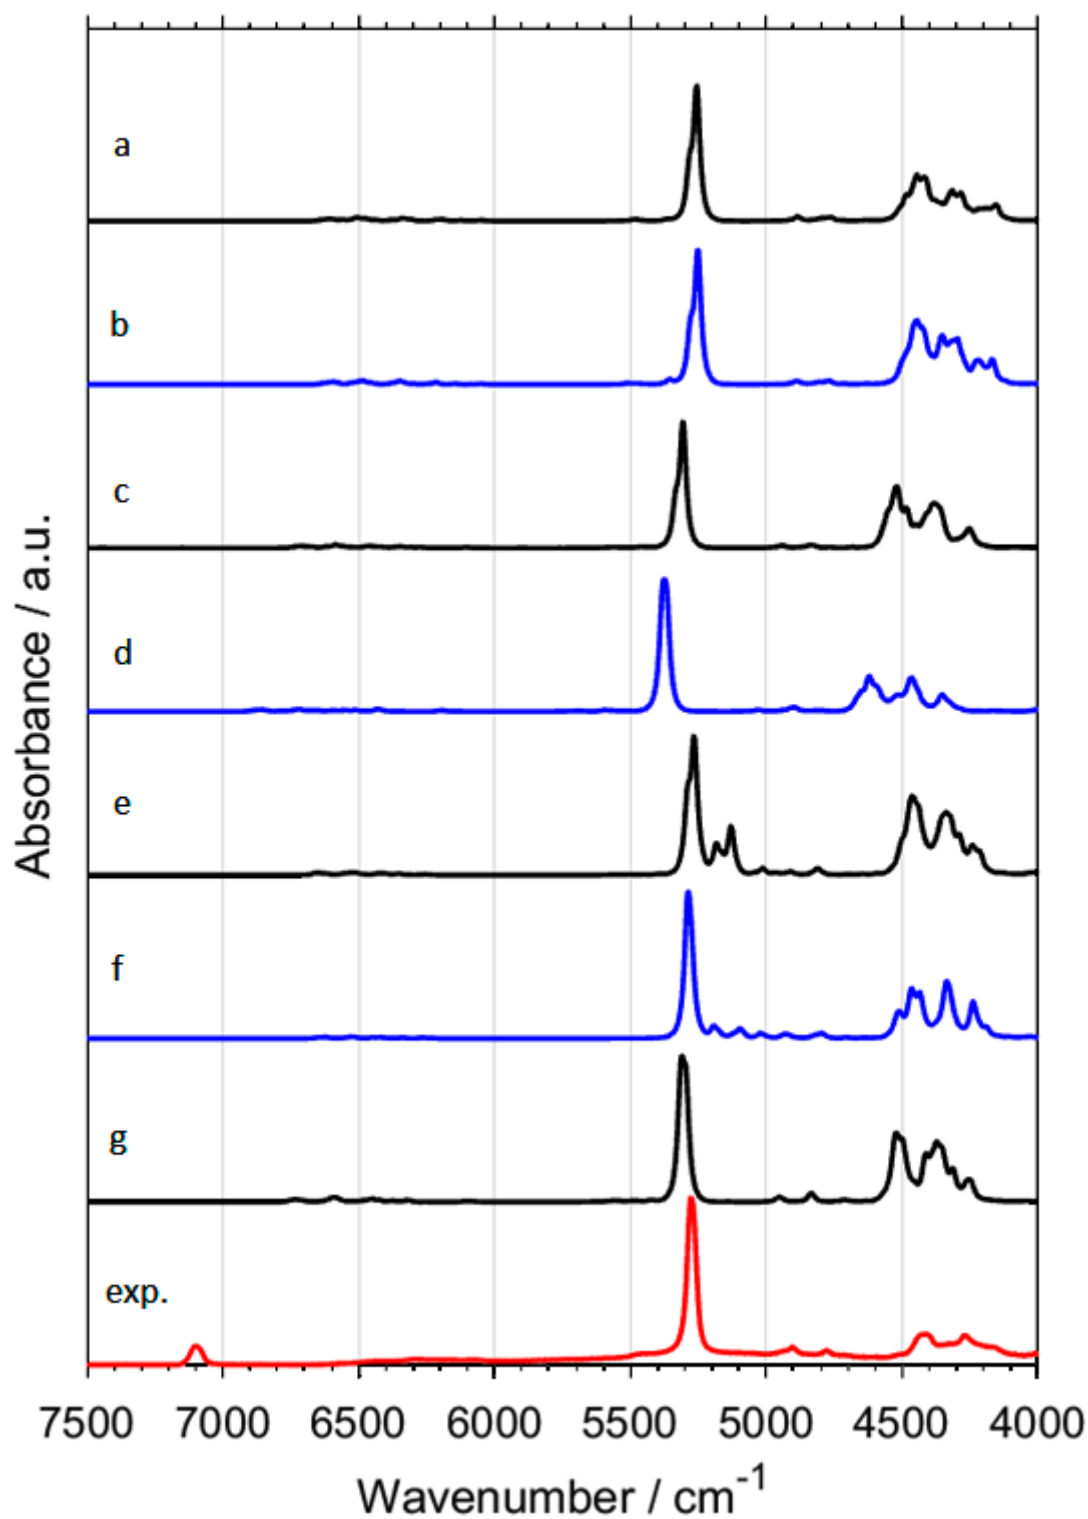

Figure S4. NIR spectra of CD<sub>3</sub>CD<sub>2</sub>OD calculated with GVPT2 method at different levels of electronic theory; (a) B3LYP-GD3BJ /6-31G(d,p); (b) B3LYP-GD3BJ /6-31G(d,p)//CPCM; (c) B2PLYP-GD3BJ/6-31G(d,p)//CPCM; (d) MP2/6-31G(d,p)//CPCM; (e) B3LYP-GD3BJ/SNST//CPCM; (f) B2PLYP-GD3BJ/def2-TZVP//CPCM; (g) MP2/aug-cc-pVTZ//CPCM. Experimental spectrum (exp.) of CD<sub>3</sub>CD<sub>2</sub>OD in CCl<sub>4</sub> (0.1 M).

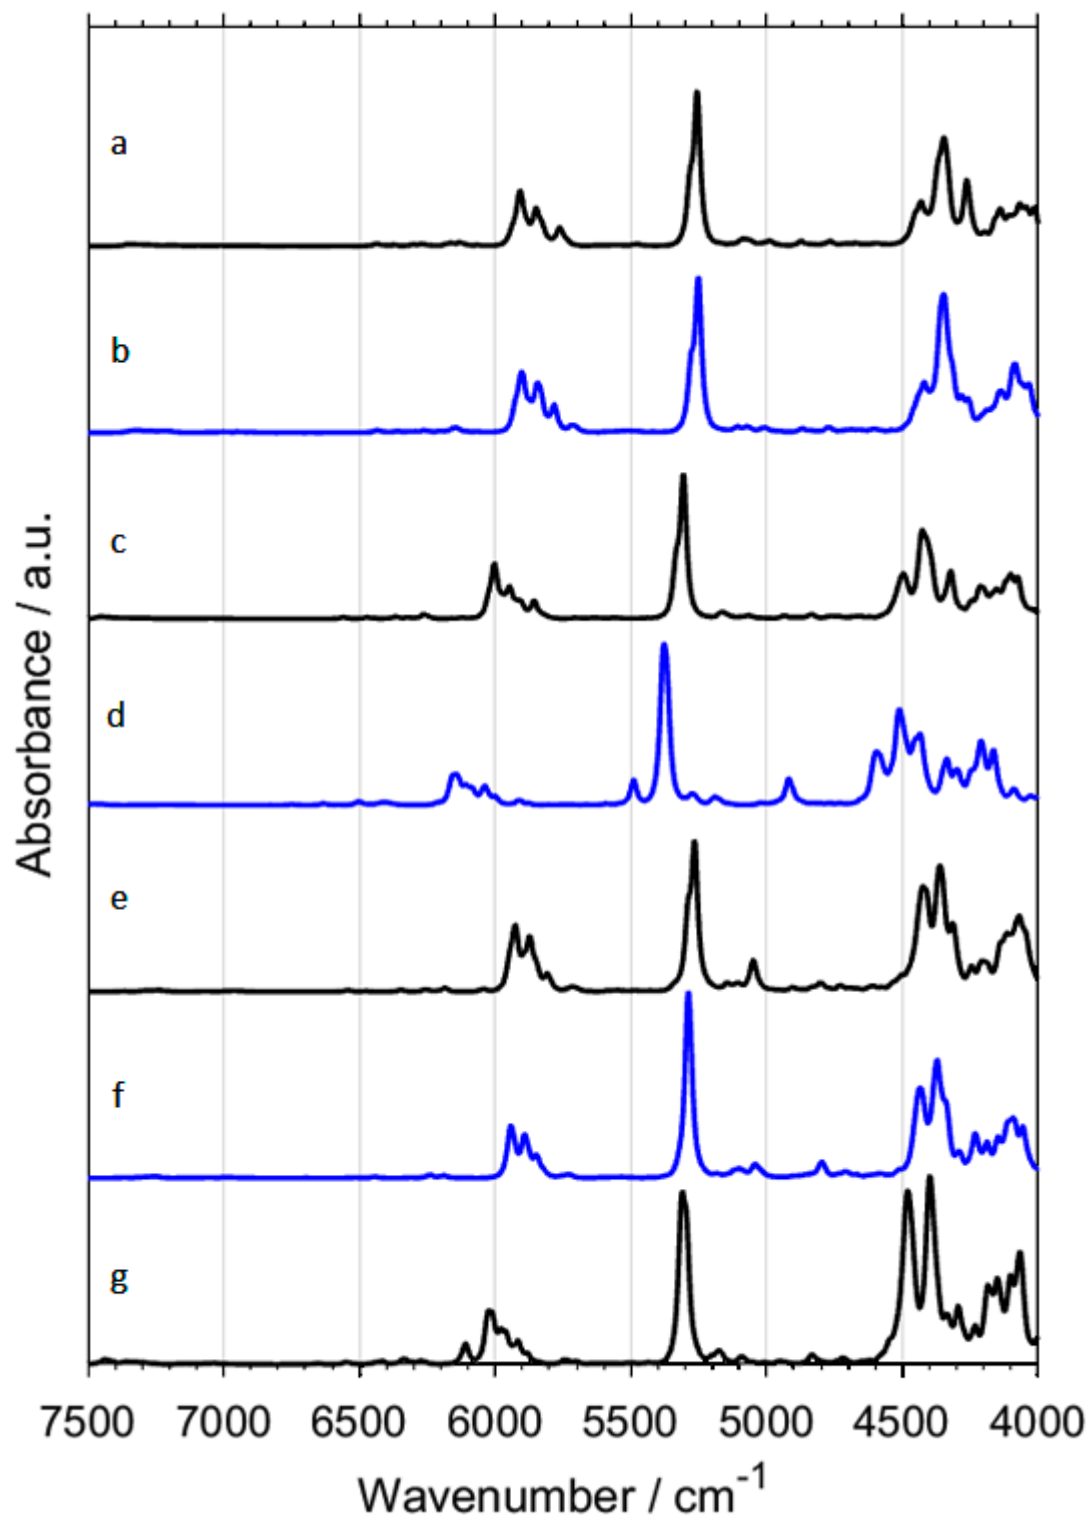

Figure S5. NIR spectra of  $\text{CH}_3\text{CD}_2\text{OD}$  calculated with GVPT2 method at different levels of electronic theory; (a) B3LYP-GD3BJ /6-31G(d,p); (b) B3LYP-GD3BJ /6-31G(d,p)//CPCM; (c) B2PLYP-GD3BJ/6-31G(d,p)//CPCM; (d) MP2/6-31G(d,p)//CPCM; (e) B3LYP-GD3BJ/SNST//CPCM; (f) B2PLYP-GD3BJ/def2-TZVP//CPCM; (g) MP2/aug-cc-pVTZ//CPCM.

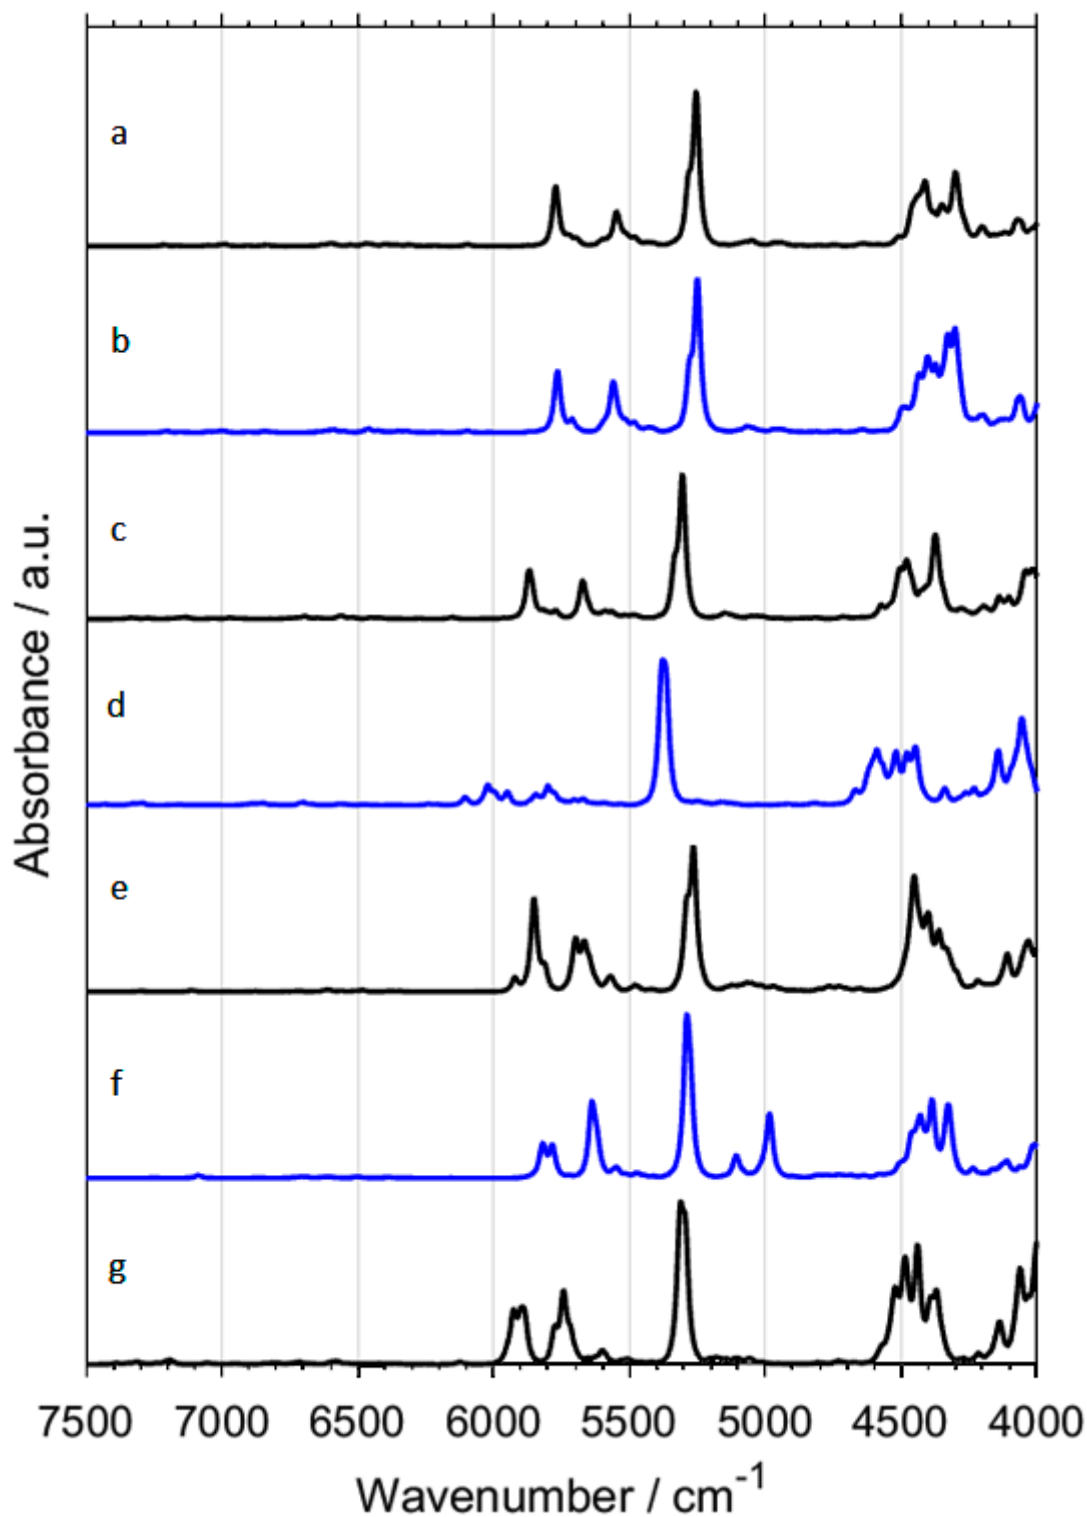

Figure S6. NIR spectra of CD<sub>3</sub>CH<sub>2</sub>OD calculated with GVPT2 method at different levels of electronic theory; (a) B3LYP-GD3BJ /6-31G(d,p); (b) B3LYP-GD3BJ /6-31G(d,p)//CPCM; (c) B2PLYP-GD3BJ/6-31G(d,p)//CPCM; (d) MP2/6-31G(d,p)//CPCM; (e) B3LYP-GD3BJ/SNST//CPCM; (f) B2PLYP-GD3BJ/def2-TZVP//CPCM; (g) MP2/aug-cc-pVTZ//CPCM.

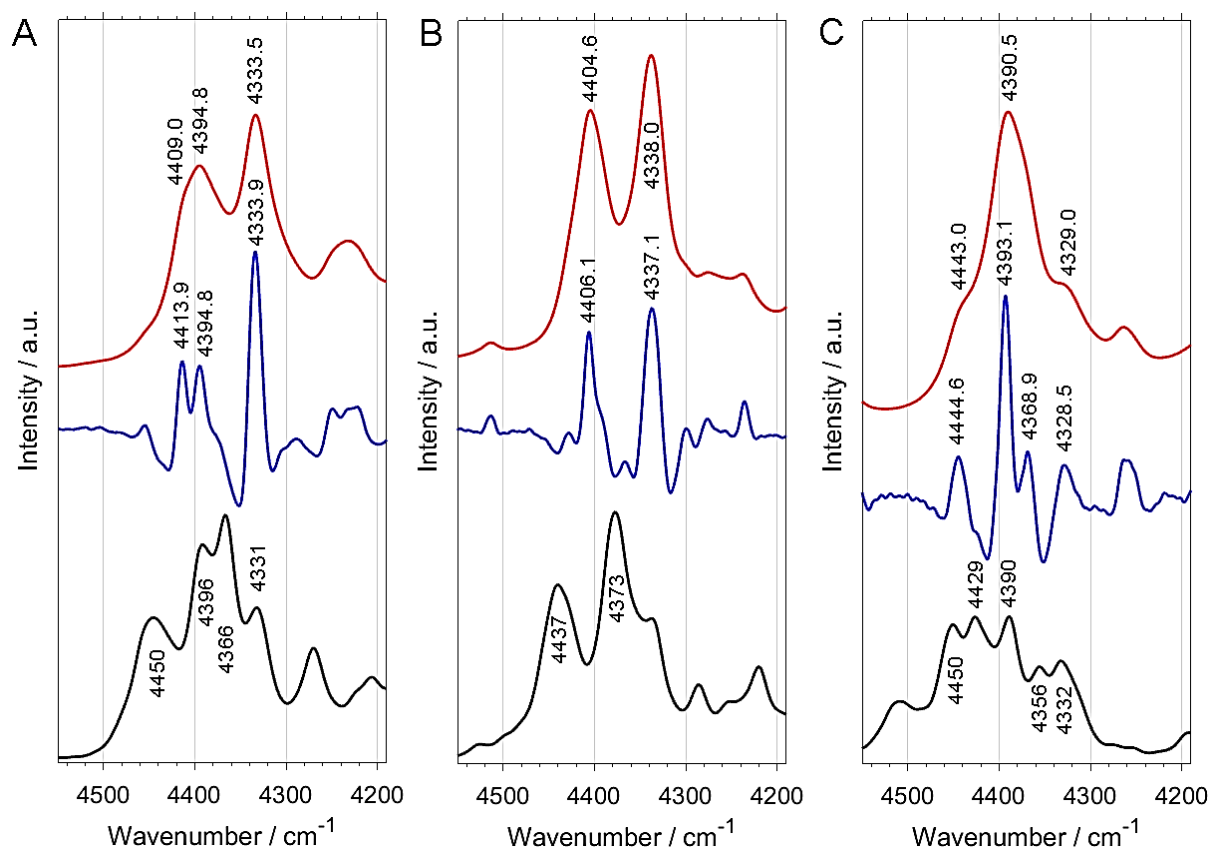

Figure S7. The details of NIR spectra of (A)  $\text{CH}_3\text{CH}_2\text{OH}$ ; (B)  $\text{CH}_3\text{CD}_2\text{OH}$ ; (C)  $\text{CD}_3\text{CH}_2\text{OH}$  in the 4550-4200  $\text{cm}^{-1}$ . From up to bottom: experimental NIR spectrum (red line); second derivative spectrum, multiplied by -1 (blue line); theoretical (B2PLYP-GD3BJ/def2-TZVP//CPCM) spectrum (black line).



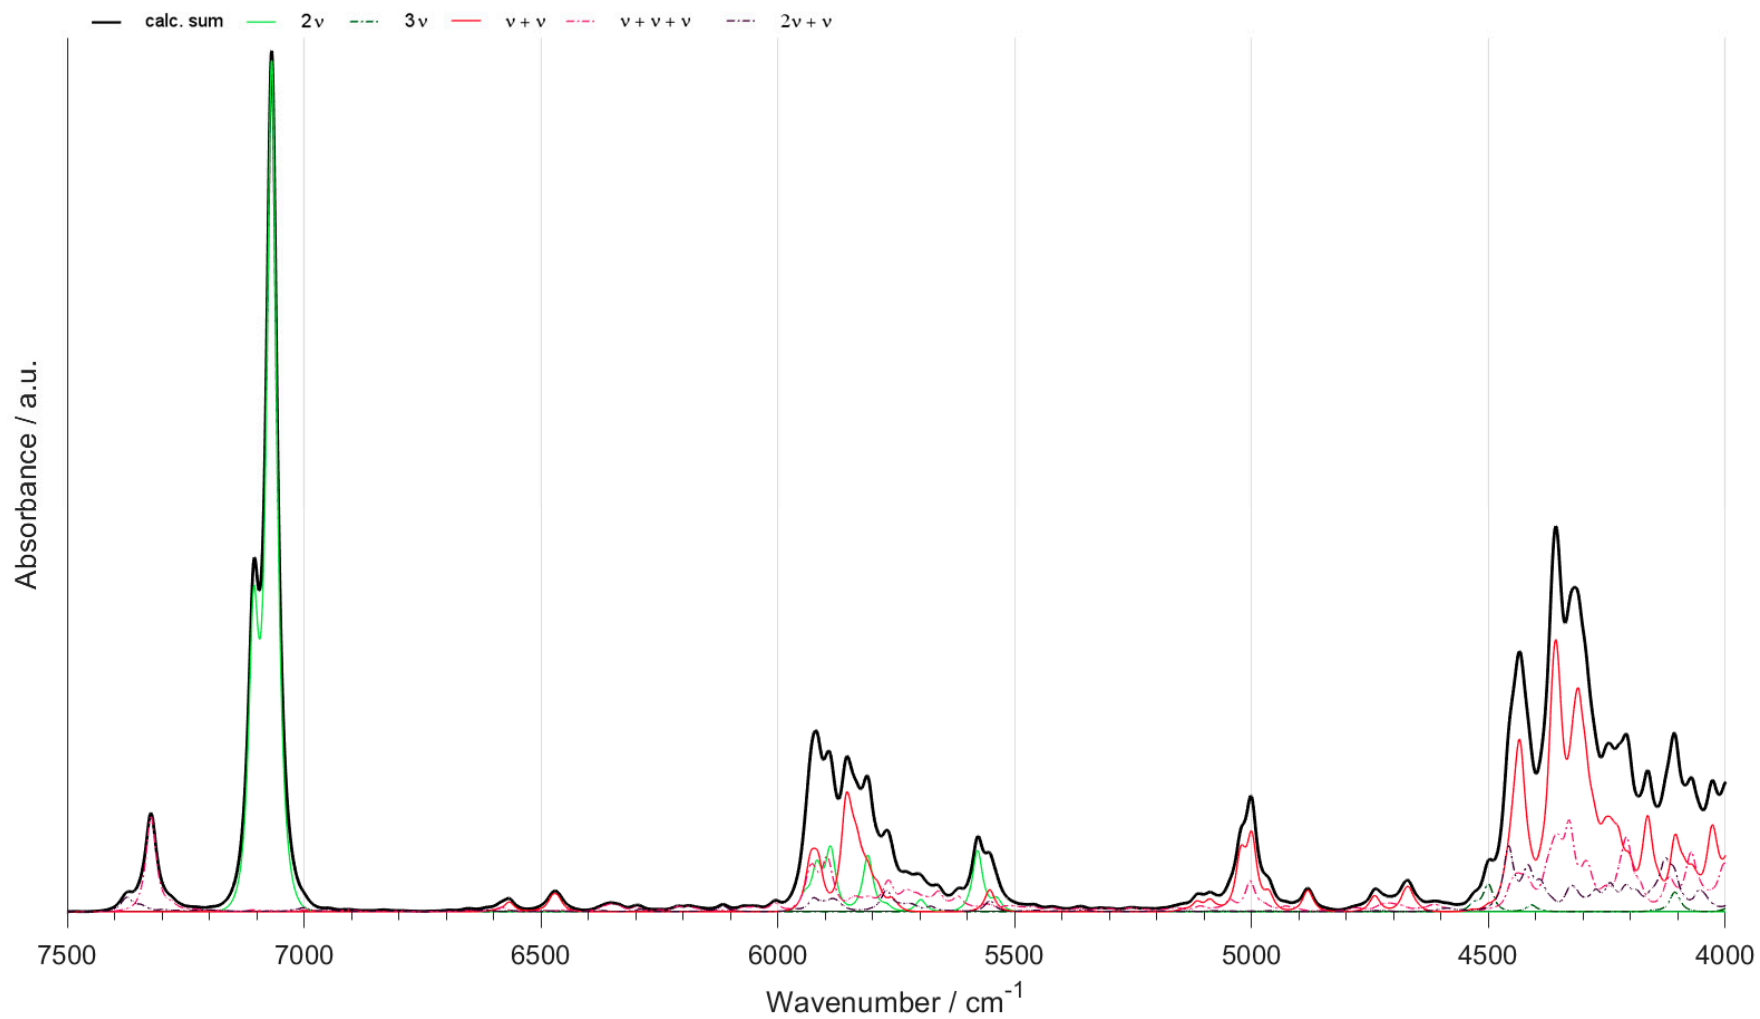

Figure S8. (Enlarged) NIR spectra of  $\text{CH}_3\text{CH}_2\text{OH}$  calculated with GVPT2 method at B3LYP-GD3BJ/6-31G(d,p) level of electronic theory

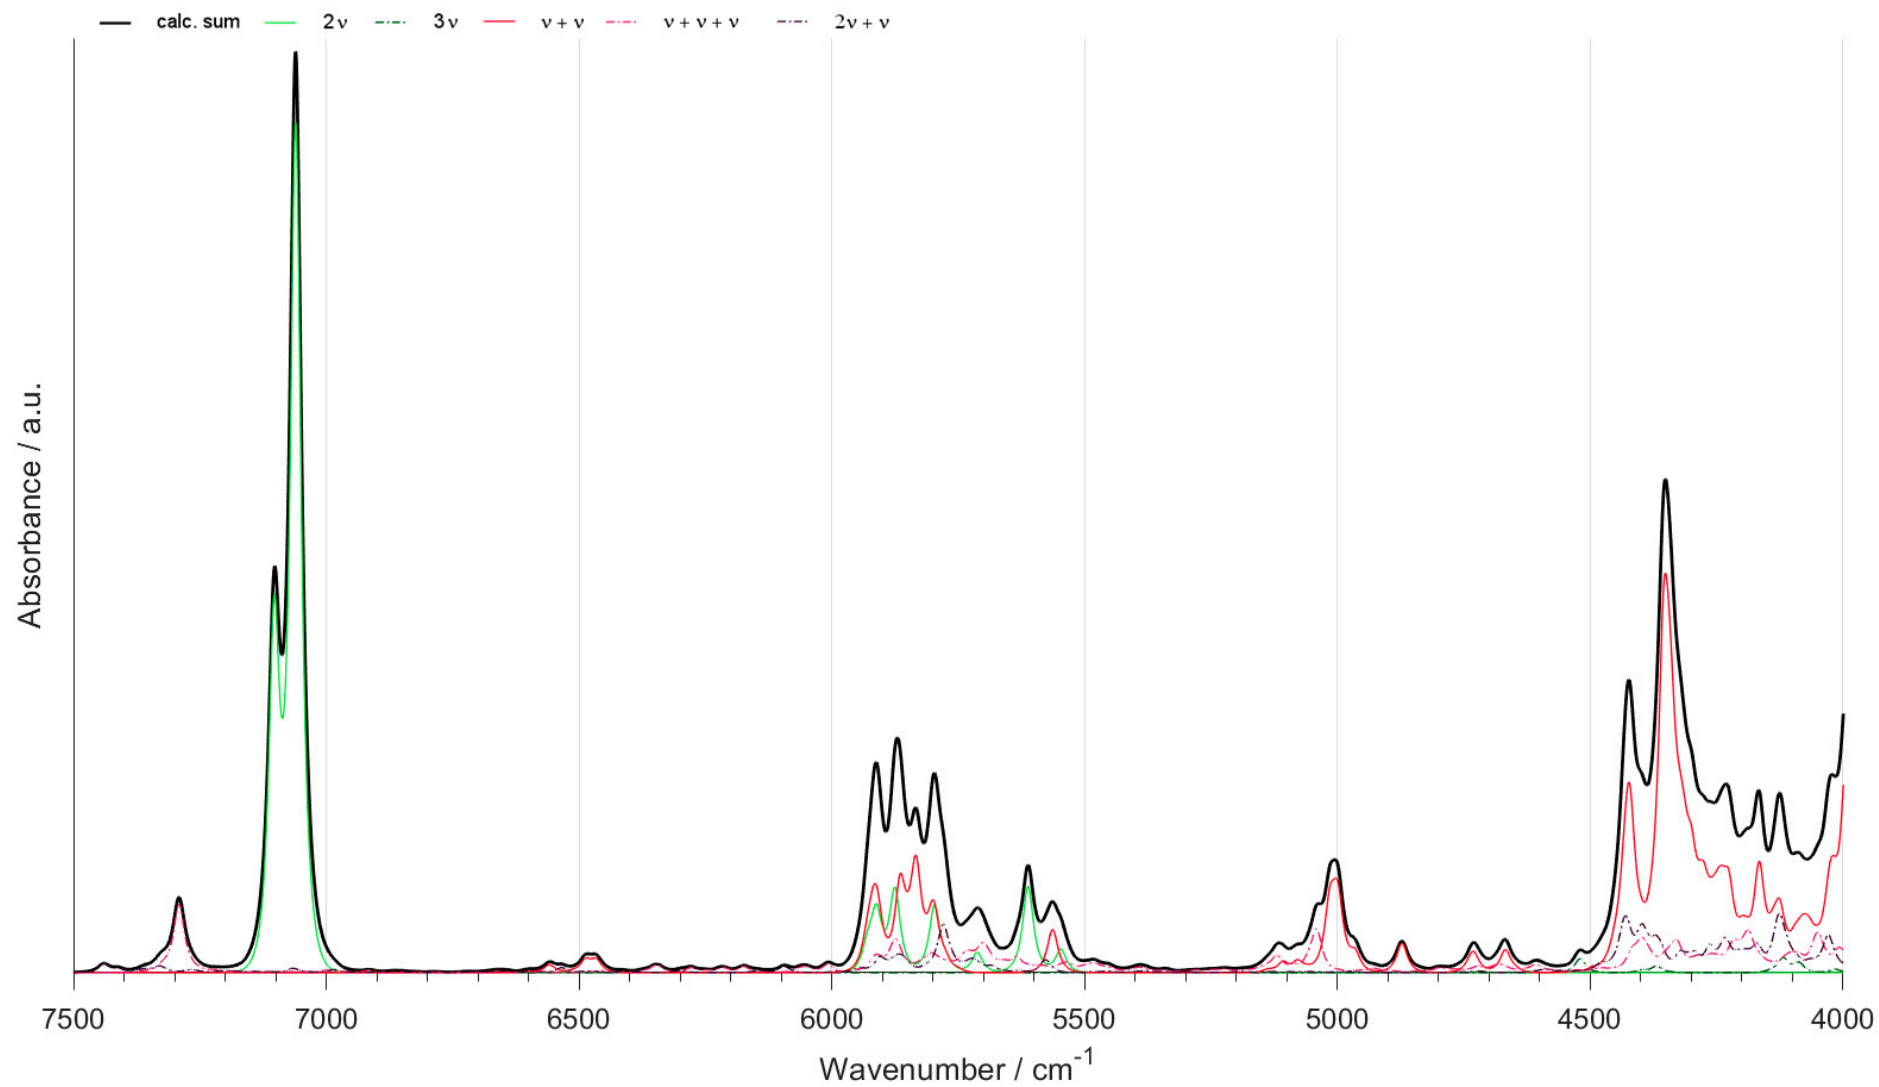

Figure S9. (High-resolution copy of Figure 1) NIR spectra of  $\text{CH}_3\text{CH}_2\text{OH}$  calculated with GVPT2 method at B3LYP-GD3BJ/6-31G(d,p)//CPCM level of electronic theory.

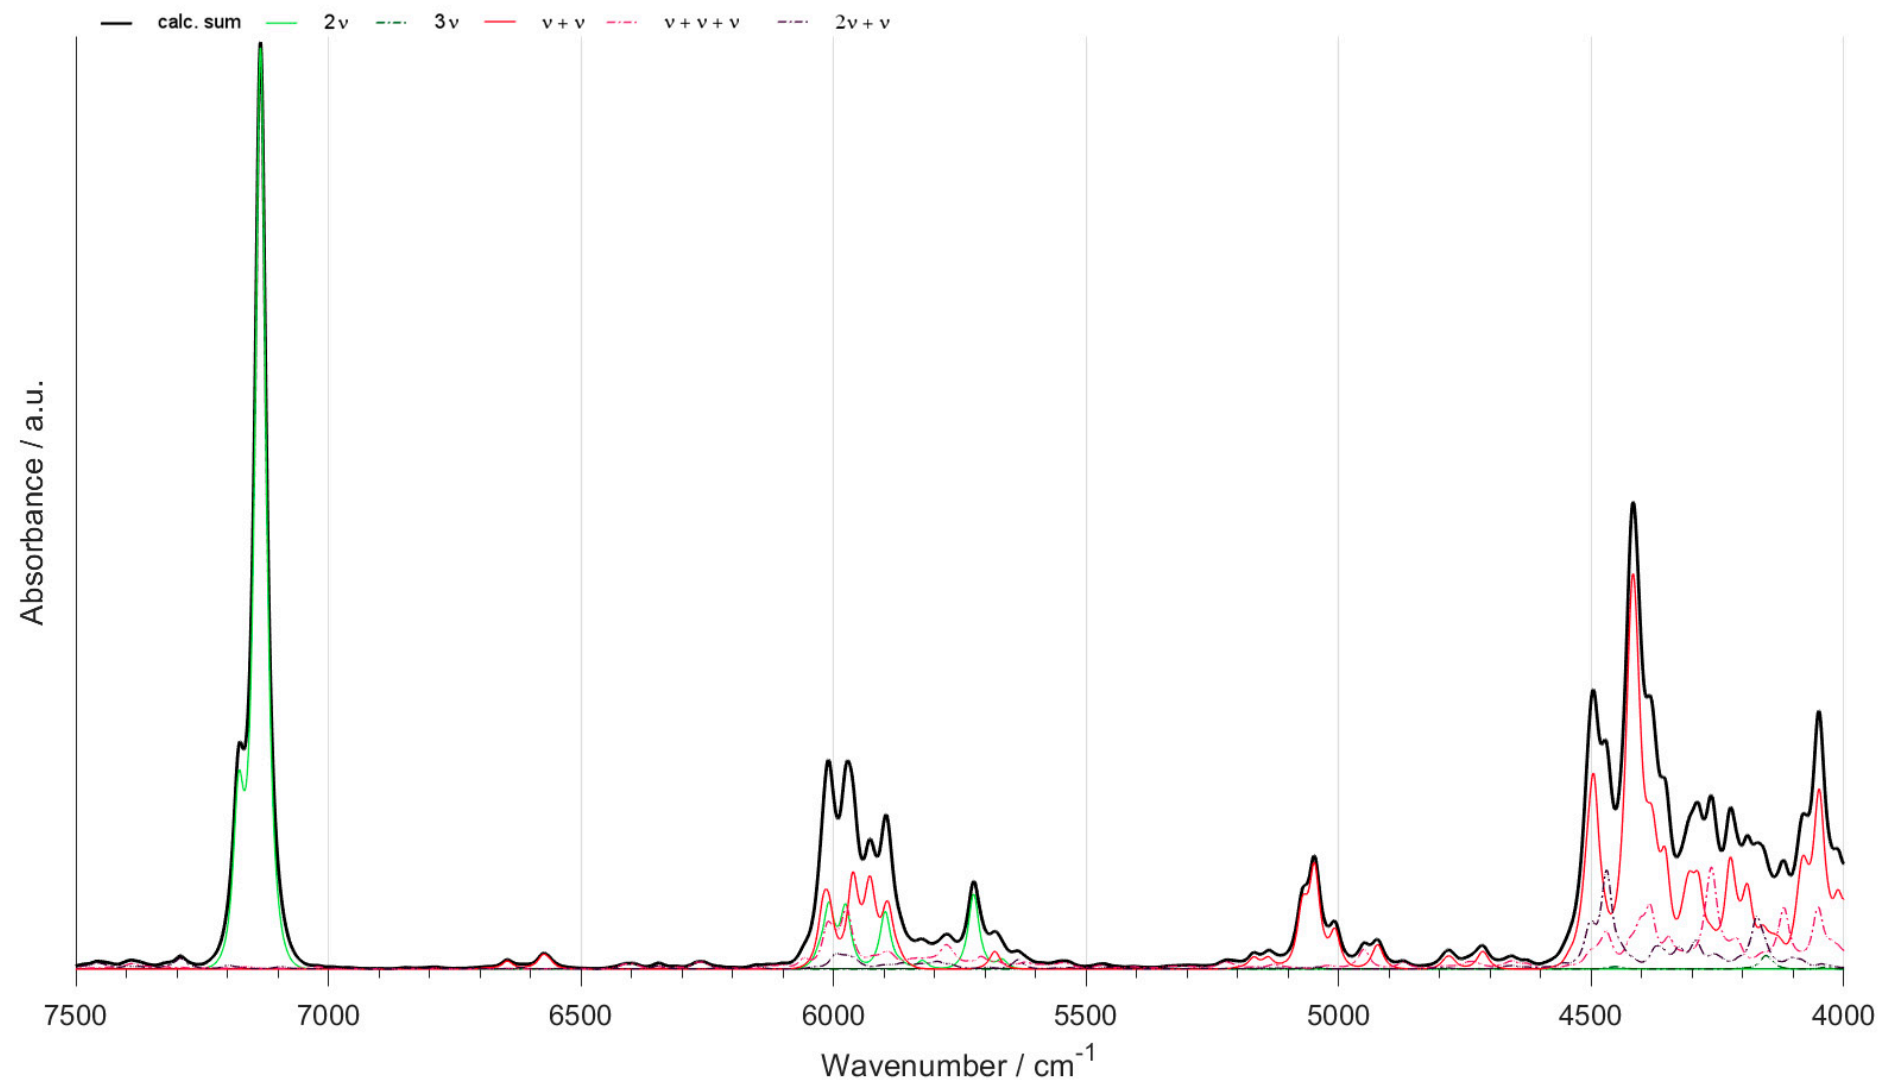

Figure S10. (High-resolution copy of Figure 1) NIR spectra of  $\text{CH}_3\text{CH}_2\text{OH}$  calculated with GVPT2 method at B2PLYP-GD3BJ/6-31G(d,p)//CPCM level of electronic theory.

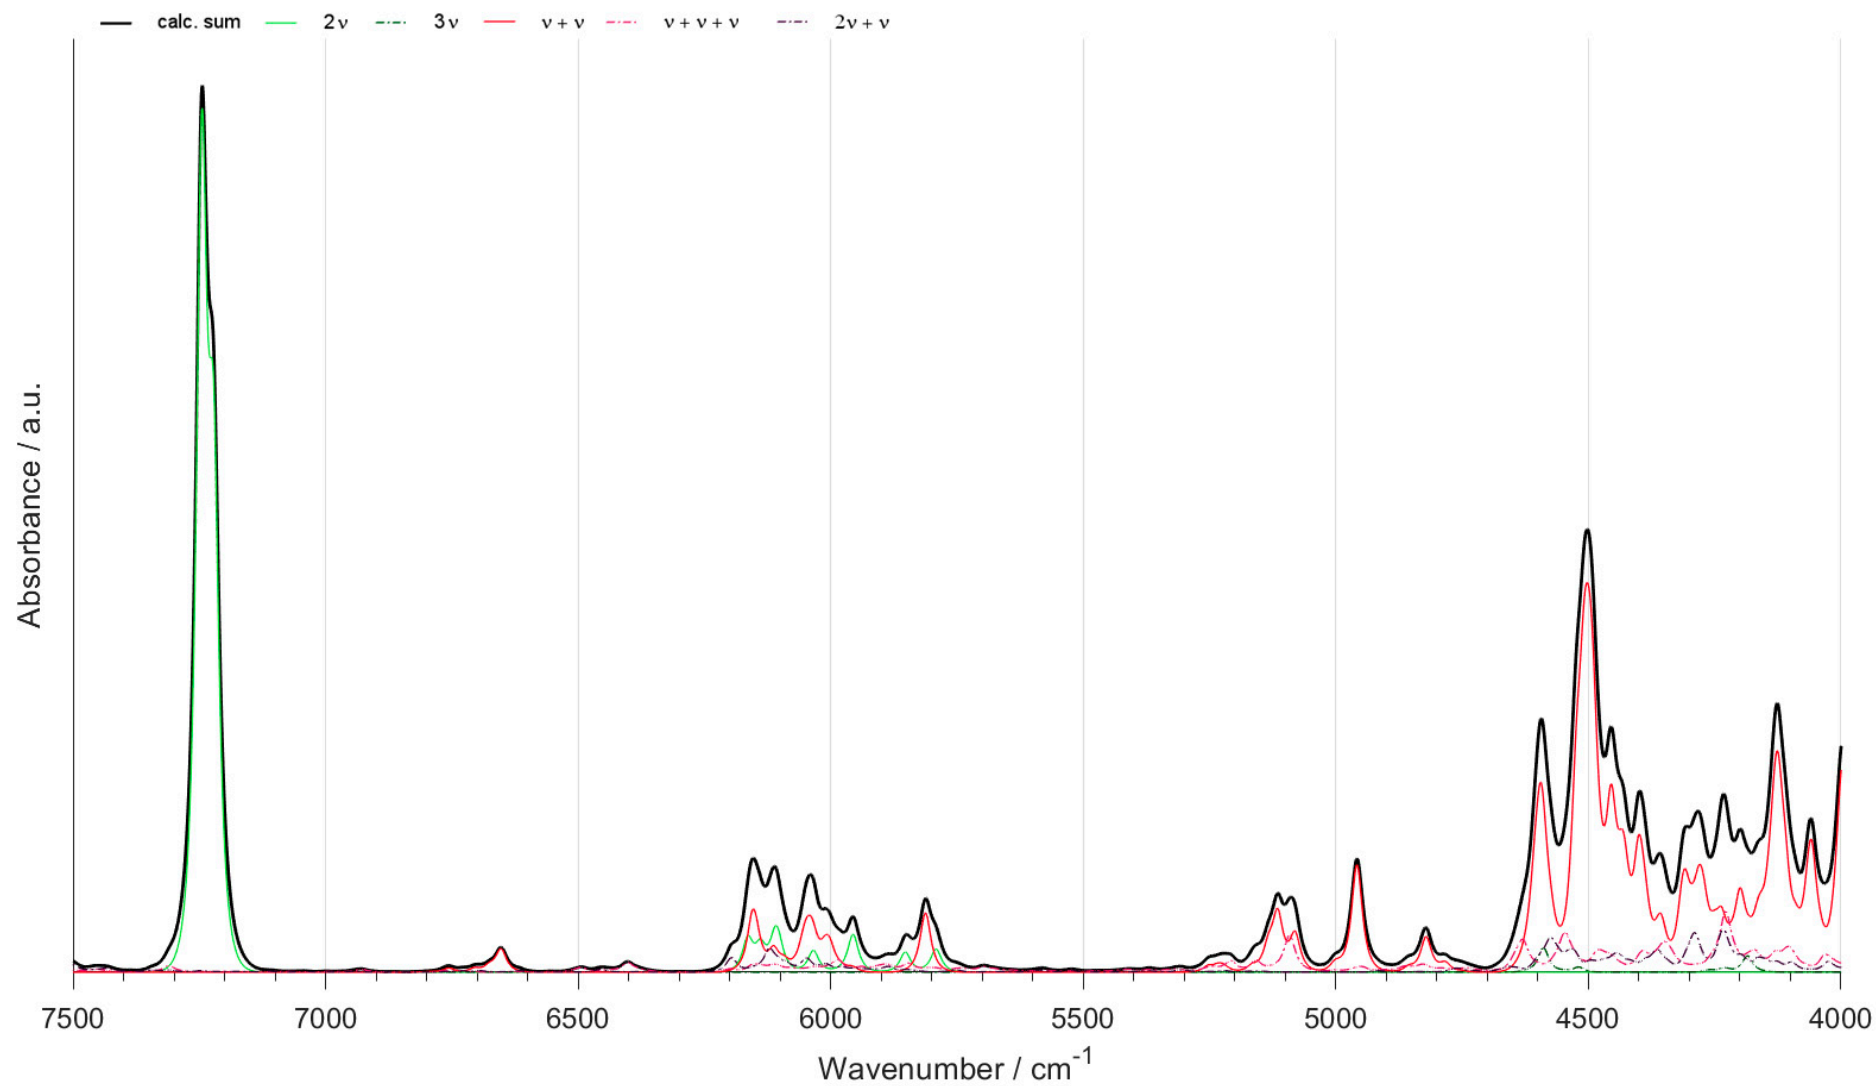

#

Figure S11. (High-resolution copy of Figure 1) NIR spectra of  $\text{CH}_3\text{CH}_2\text{OH}$  calculated with GVPT2 method at MP2/6-31G(d,p)//CPCM level of electronic theory.

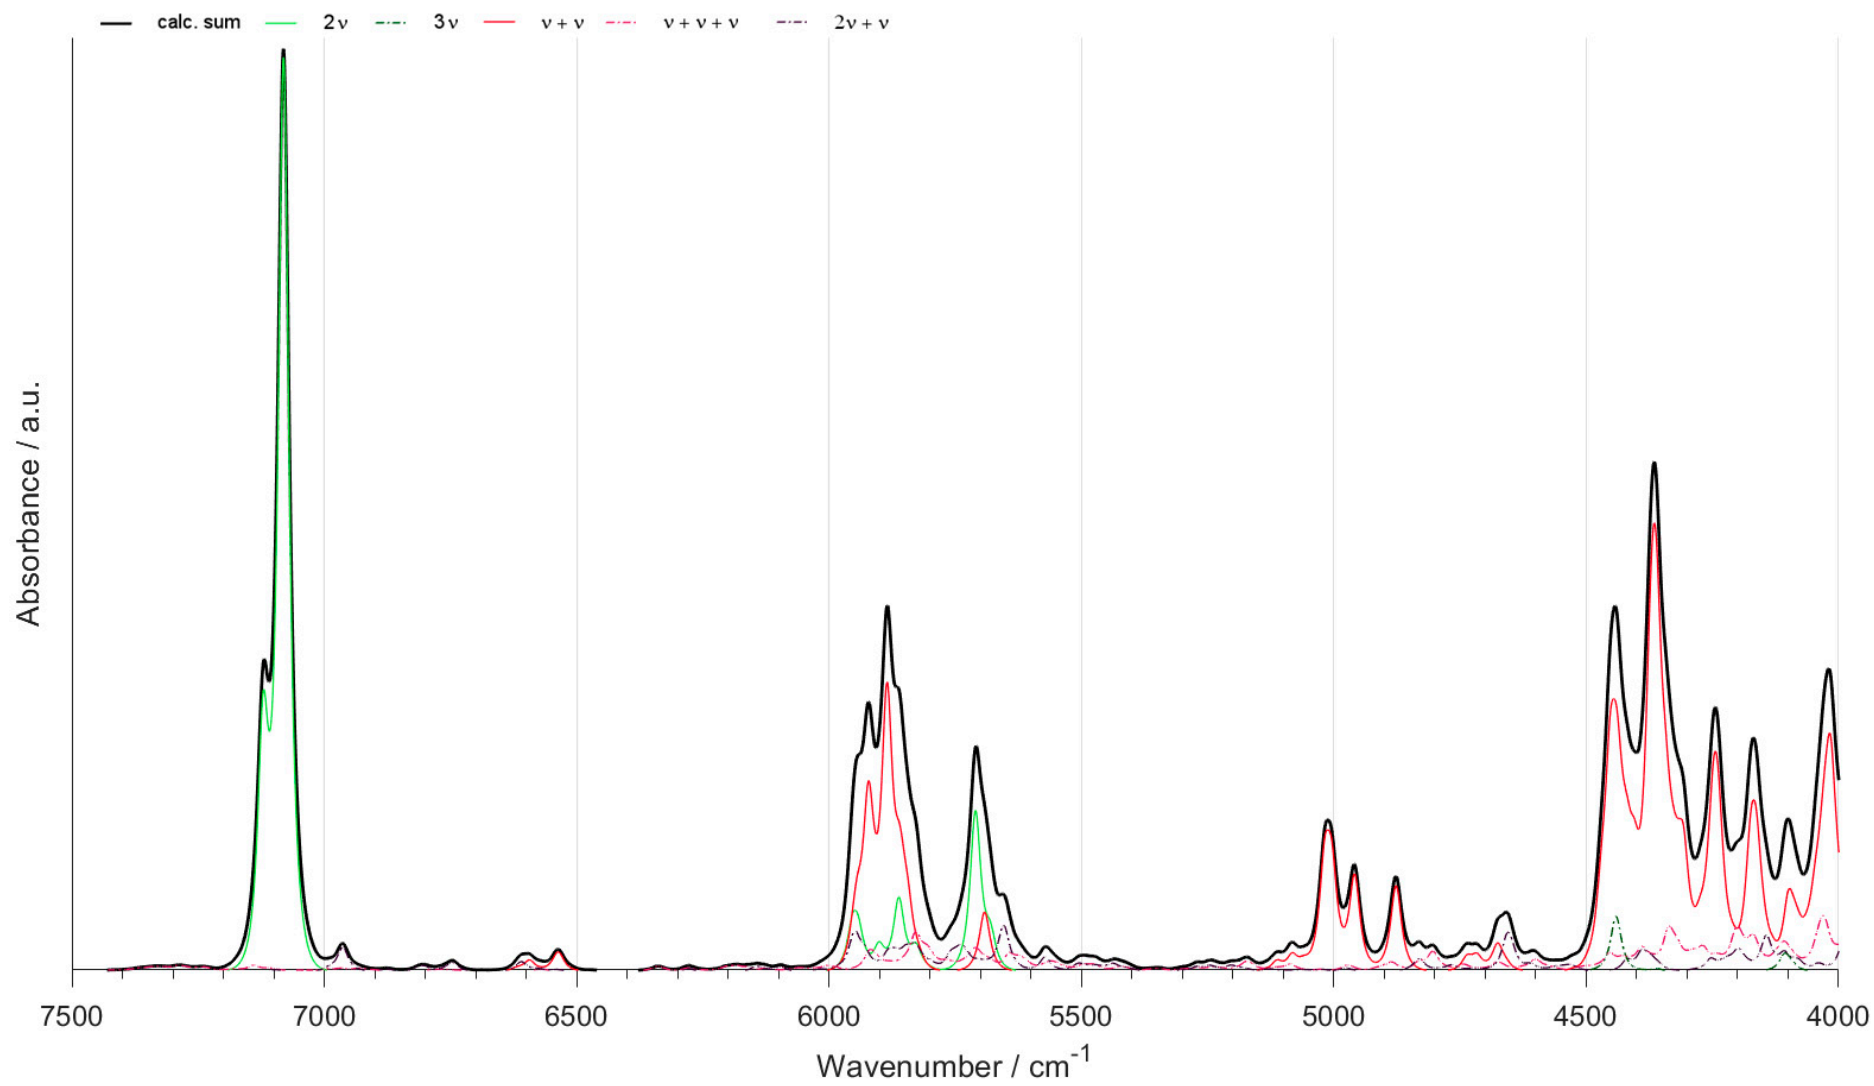

Figure S12. (High-resolution copy of Figure 1) NIR spectra of  $\text{CH}_3\text{CH}_2\text{OH}$  calculated with GVPT2 method at B3LYP-GD3BJ/SNST//CPCM level of electronic theory.

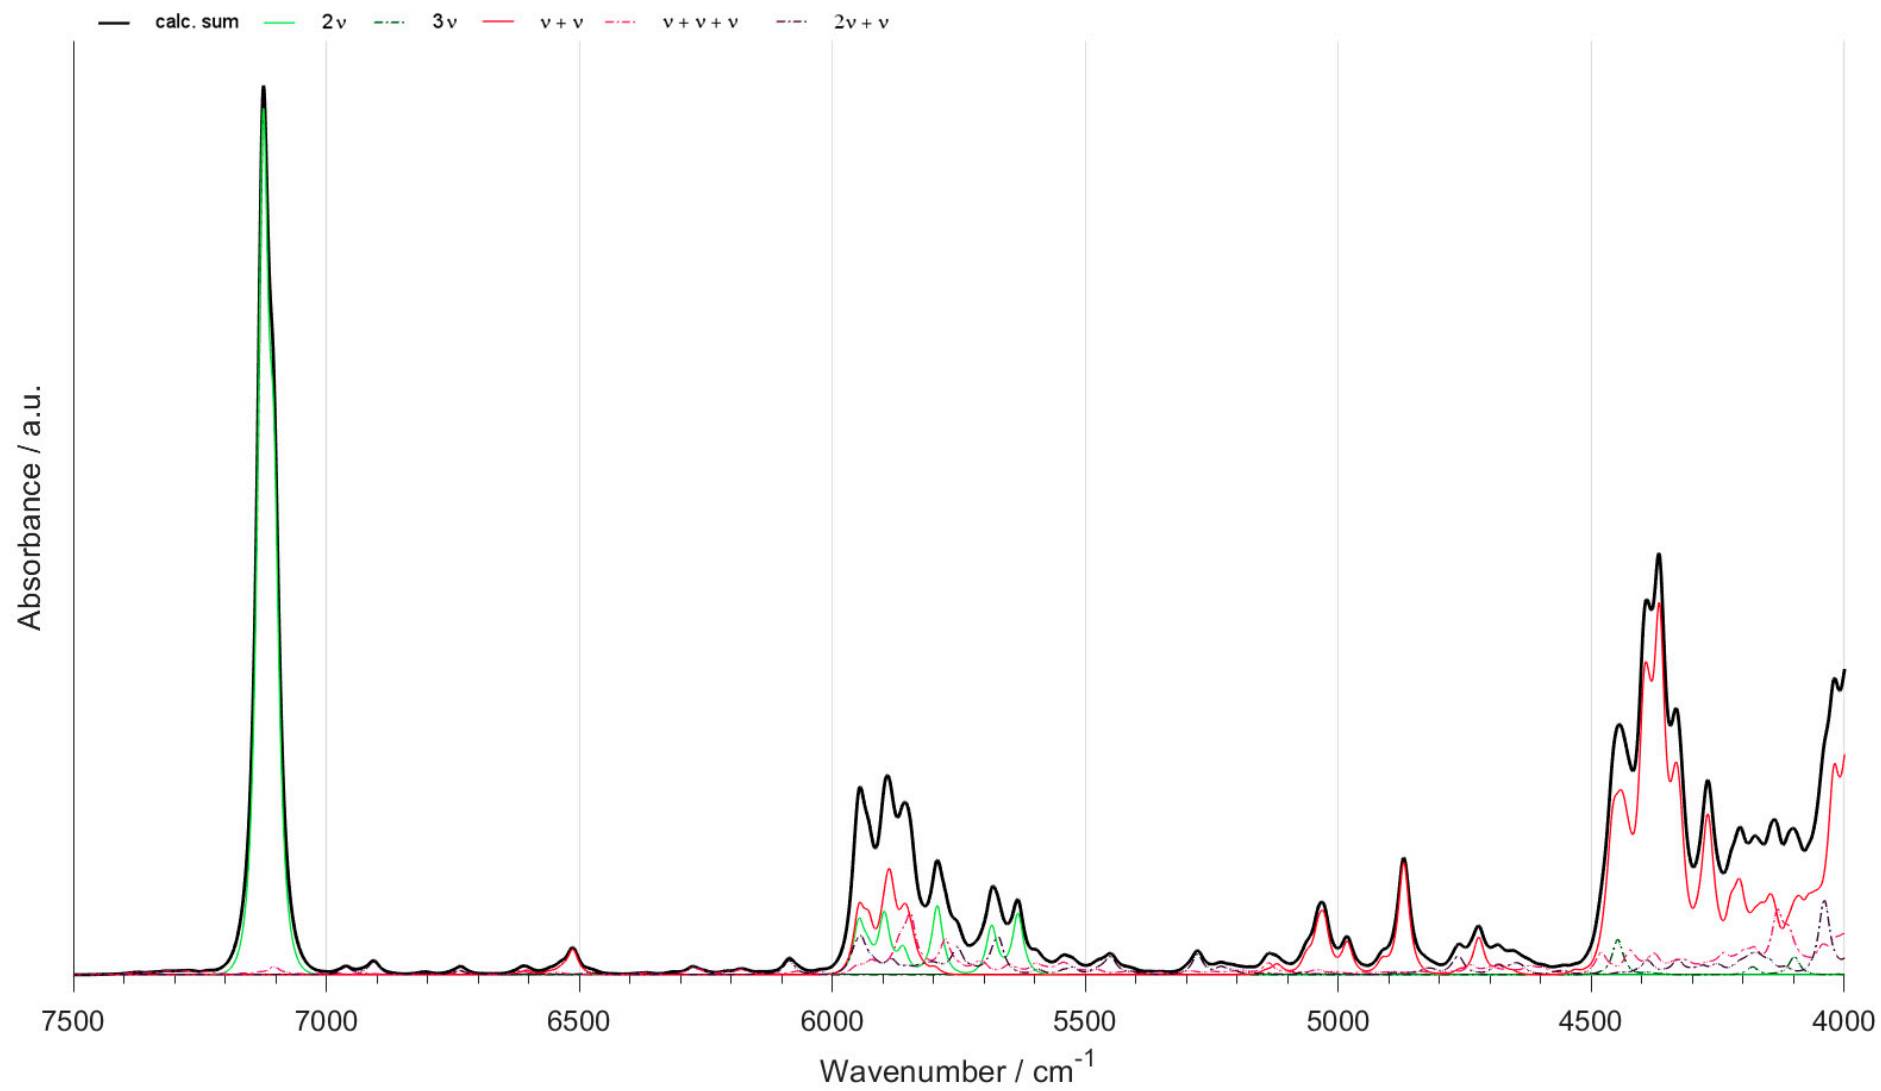

Figure S13. (High-resolution copy of Figure 1) NIR spectra of  $\text{CH}_3\text{CH}_2\text{OH}$  calculated with GVPT2 method at B2PLYP-GD3BJ/def2-TZVP//CPCM level of electronic theory.

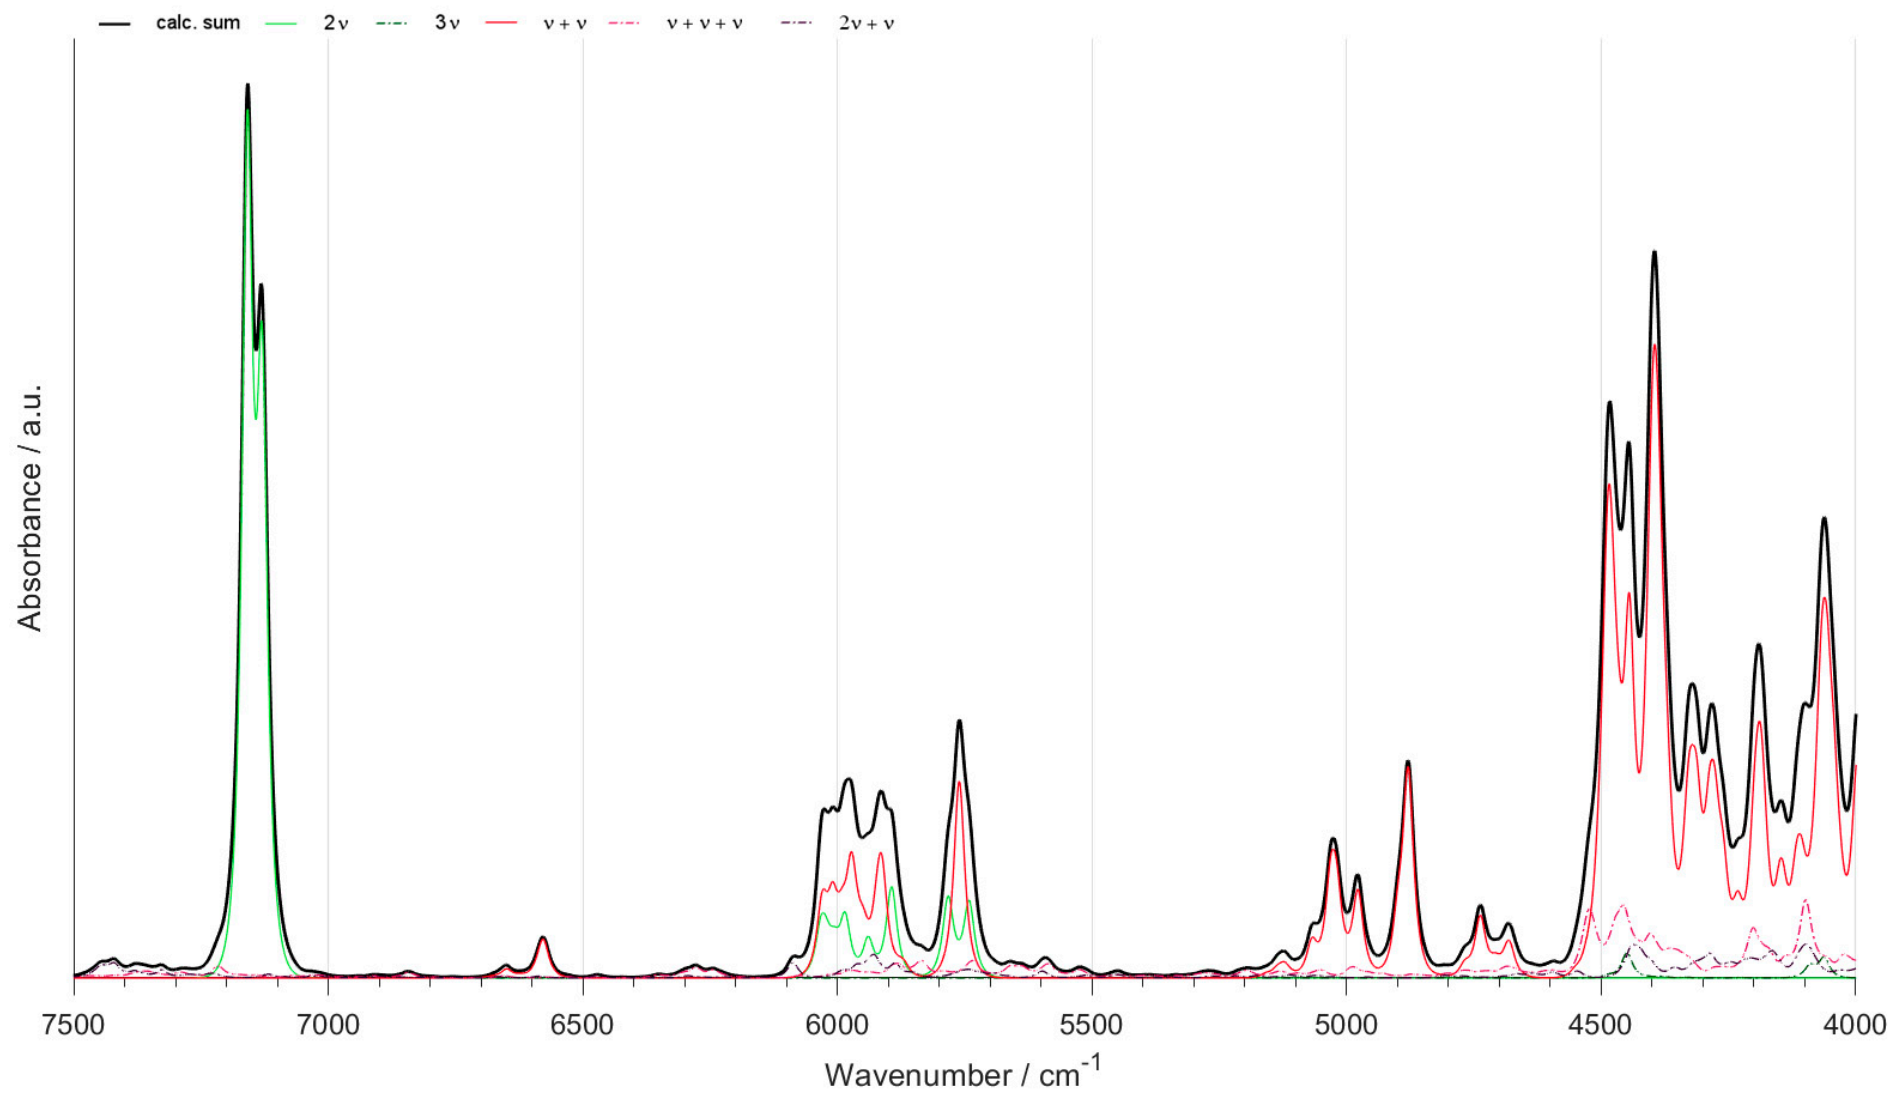

Figure S14. (High-resolution copy of Figure 1) NIR spectra of  $\text{CH}_3\text{CH}_2\text{OH}$  calculated with GVPT2 method at MP2/aug-cc-pVTZ//CPCM level of electronic theory.

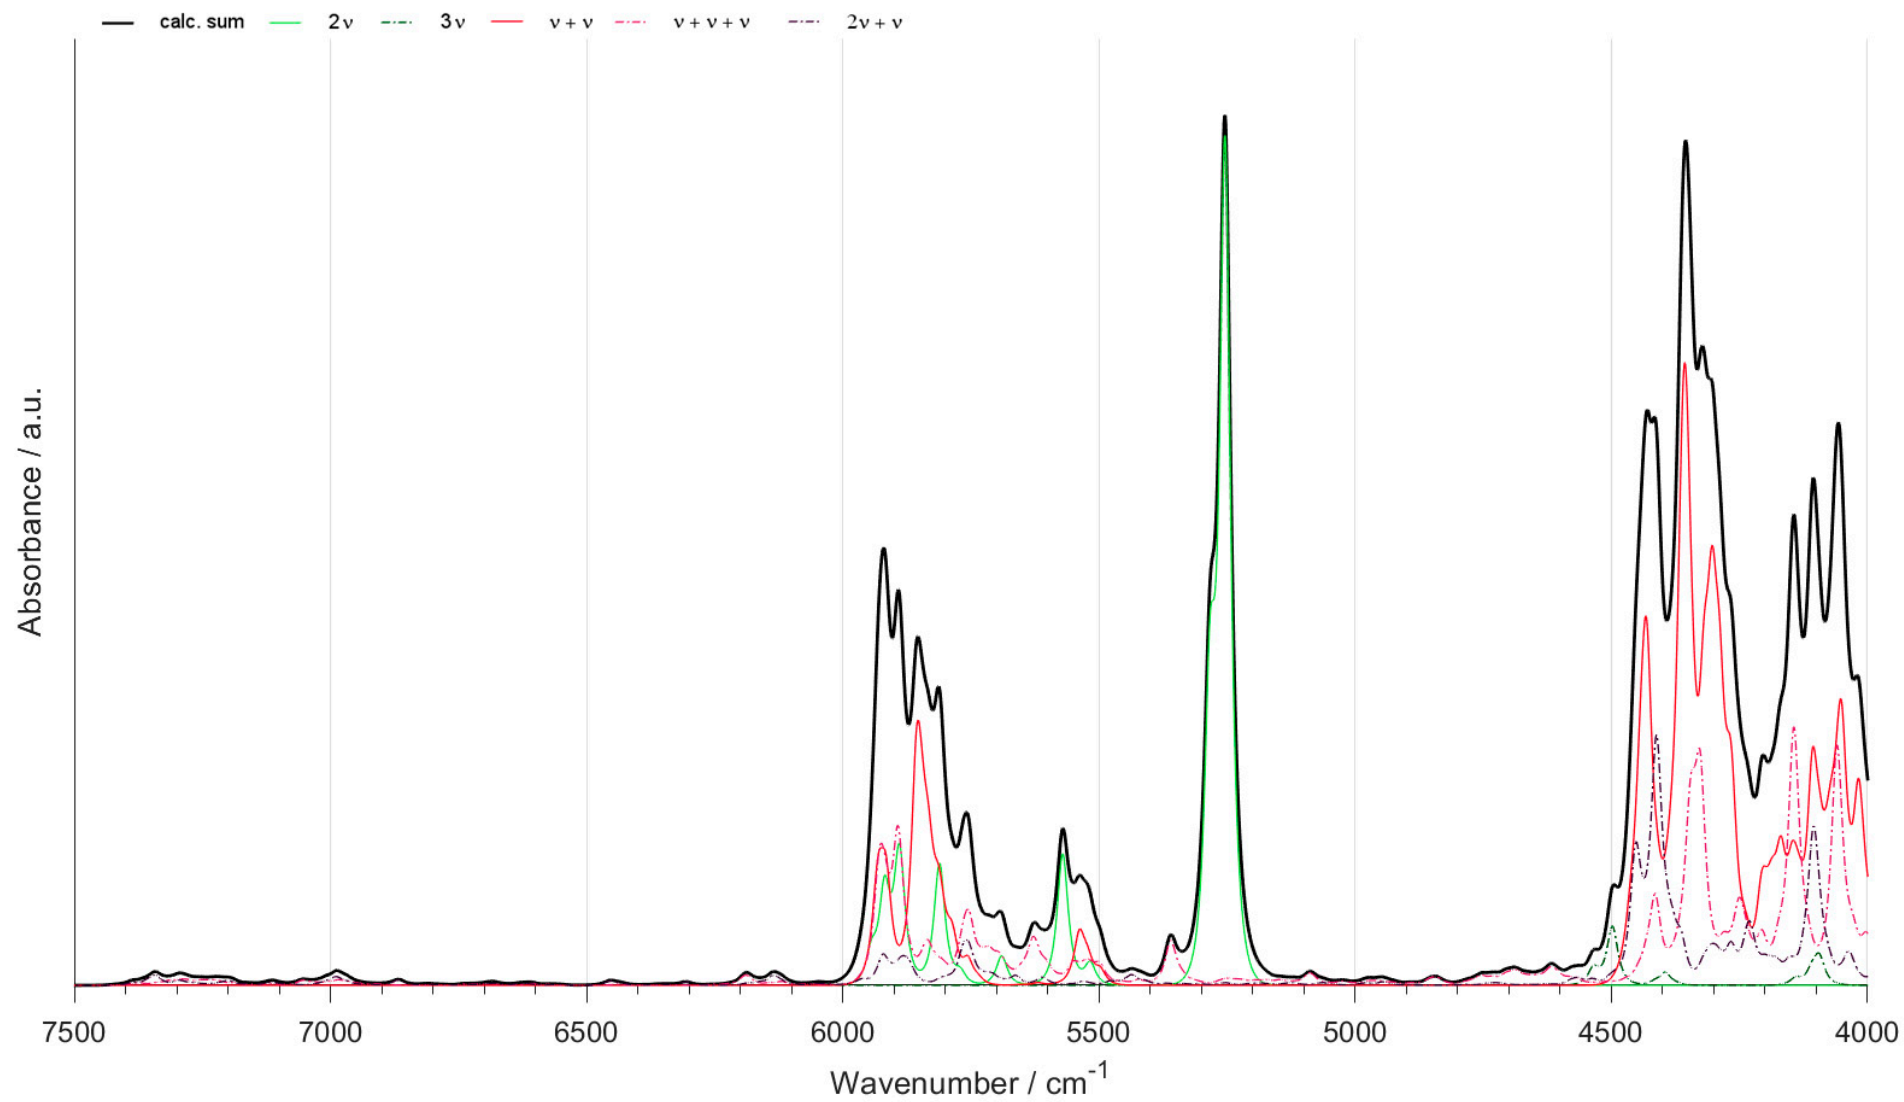

Figure S15. (High-resolution copy of Figure 2) NIR spectra of  $\text{CH}_3\text{CH}_2\text{OD}$  calculated with GVPT2 method at B3LYP-GD3BJ/6-31G(d,p) level of electronic theory.



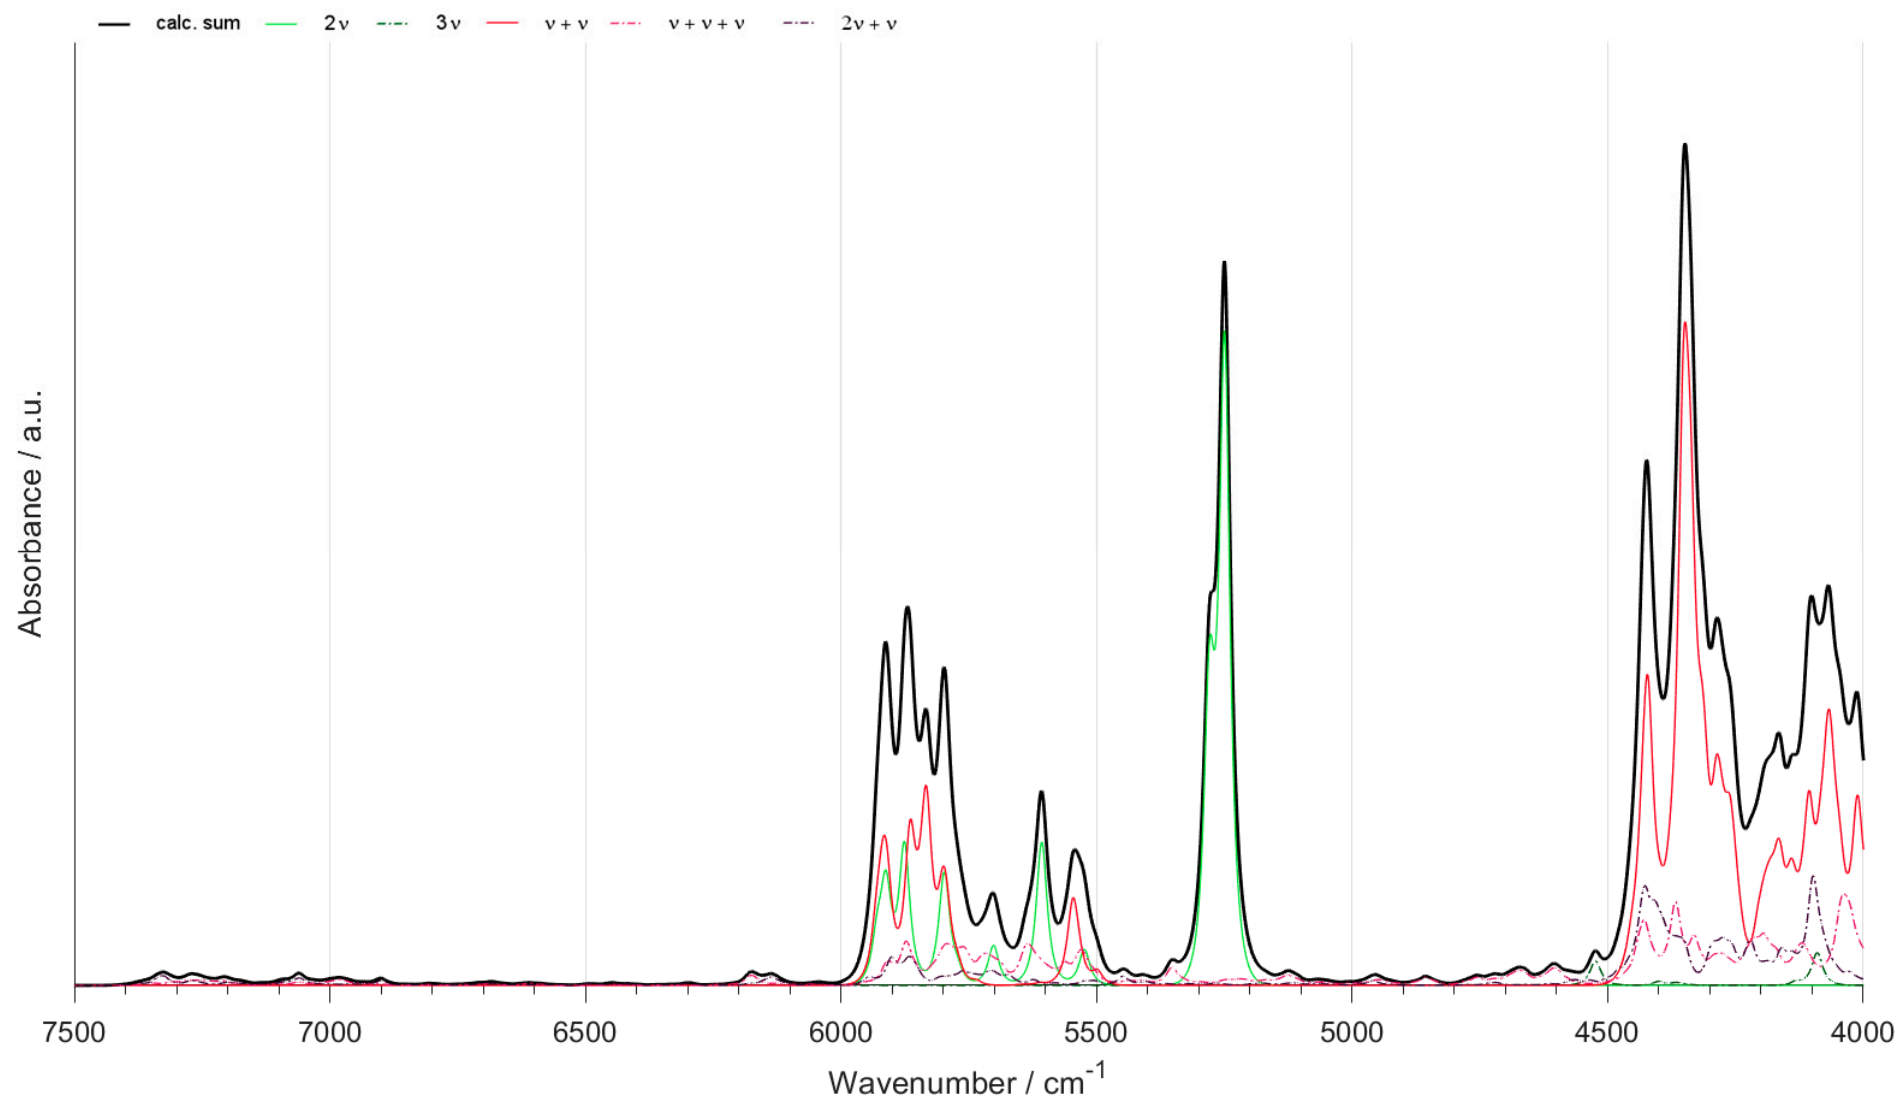

Figure S16. (High-resolution copy of Figure 2) NIR spectra of  $\text{CH}_3\text{CH}_2\text{OD}$  calculated with GVPT2 method at B3LYP-GD3BJ/6-31G(d,p)//CPCM level of electronic theory.

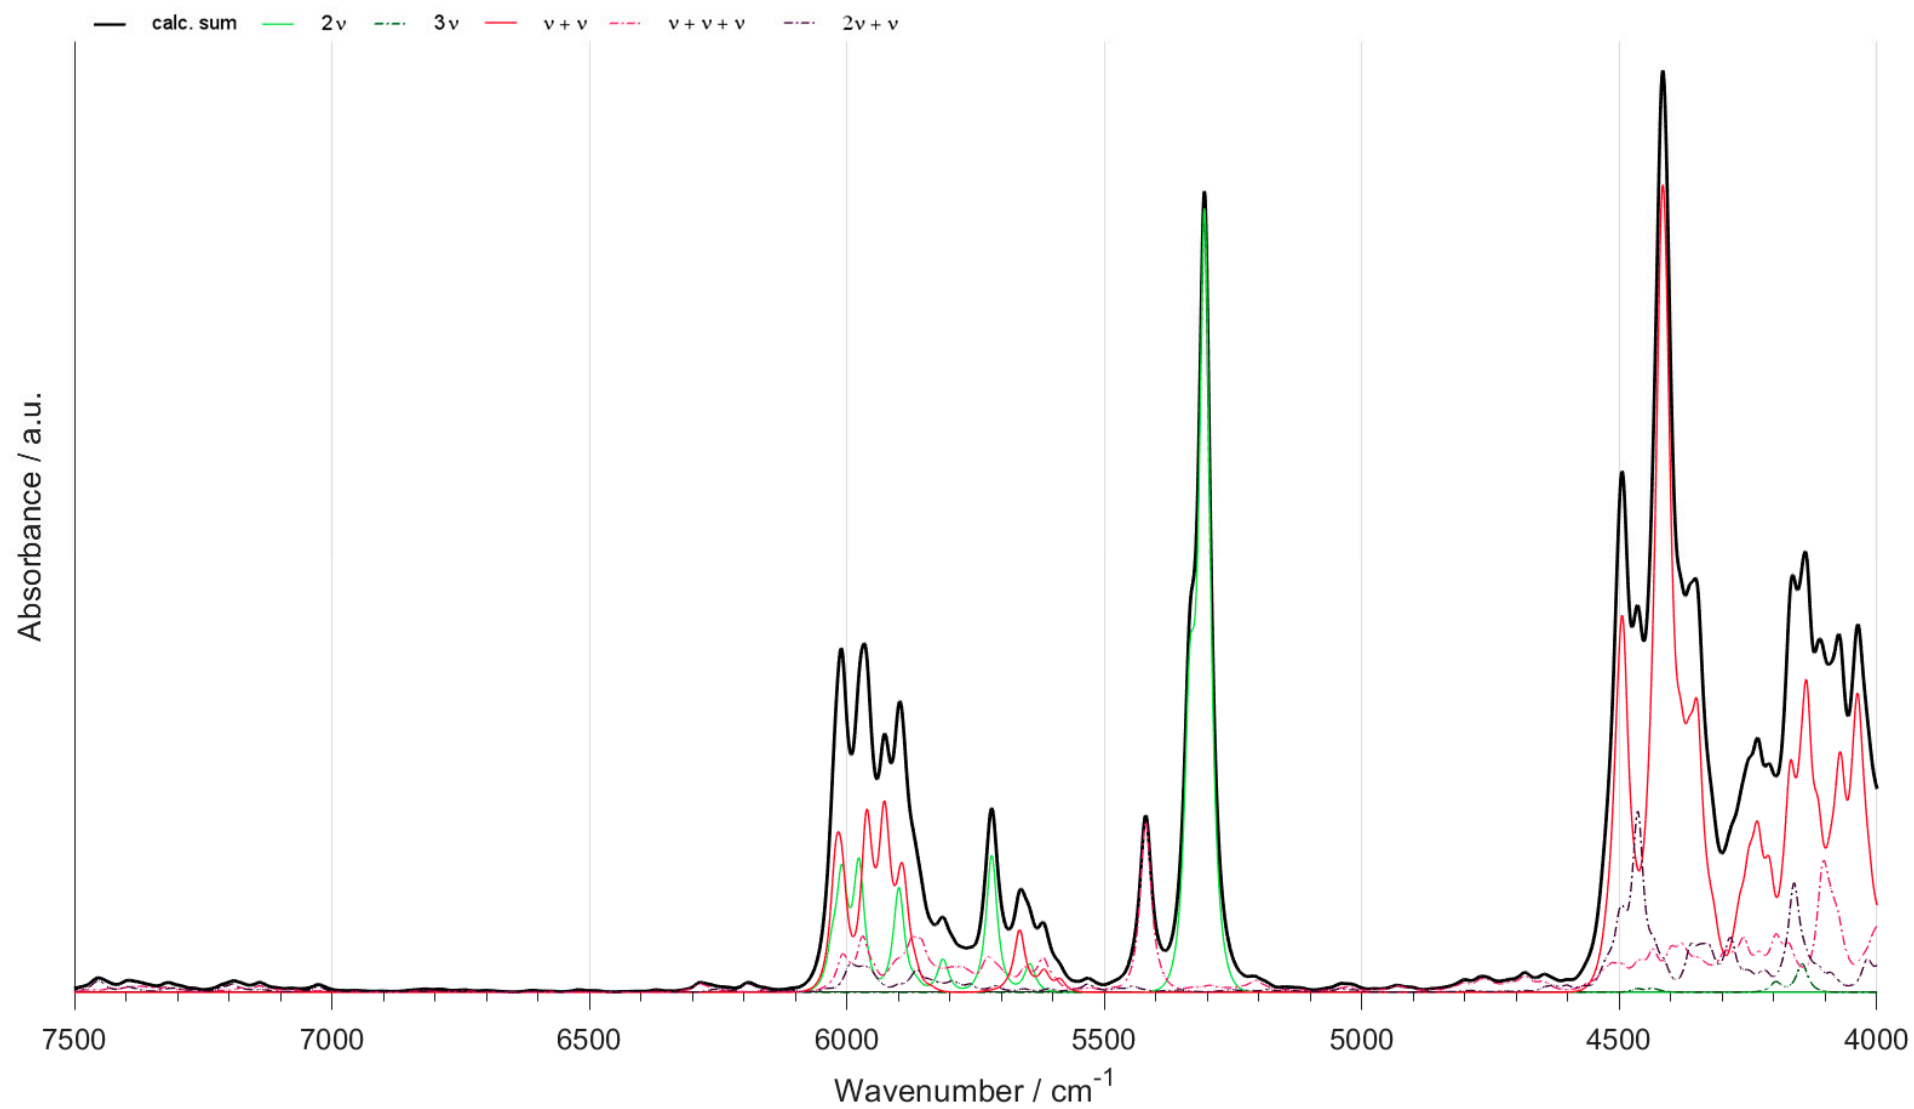

Figure S17. (High-resolution copy of Figure 2) NIR spectra of  $\text{CH}_3\text{CH}_2\text{OD}$  calculated with GVPT2 method at B2PLYP-GD3BJ/6-31G(d,p)//CPCM level of electronic theory.

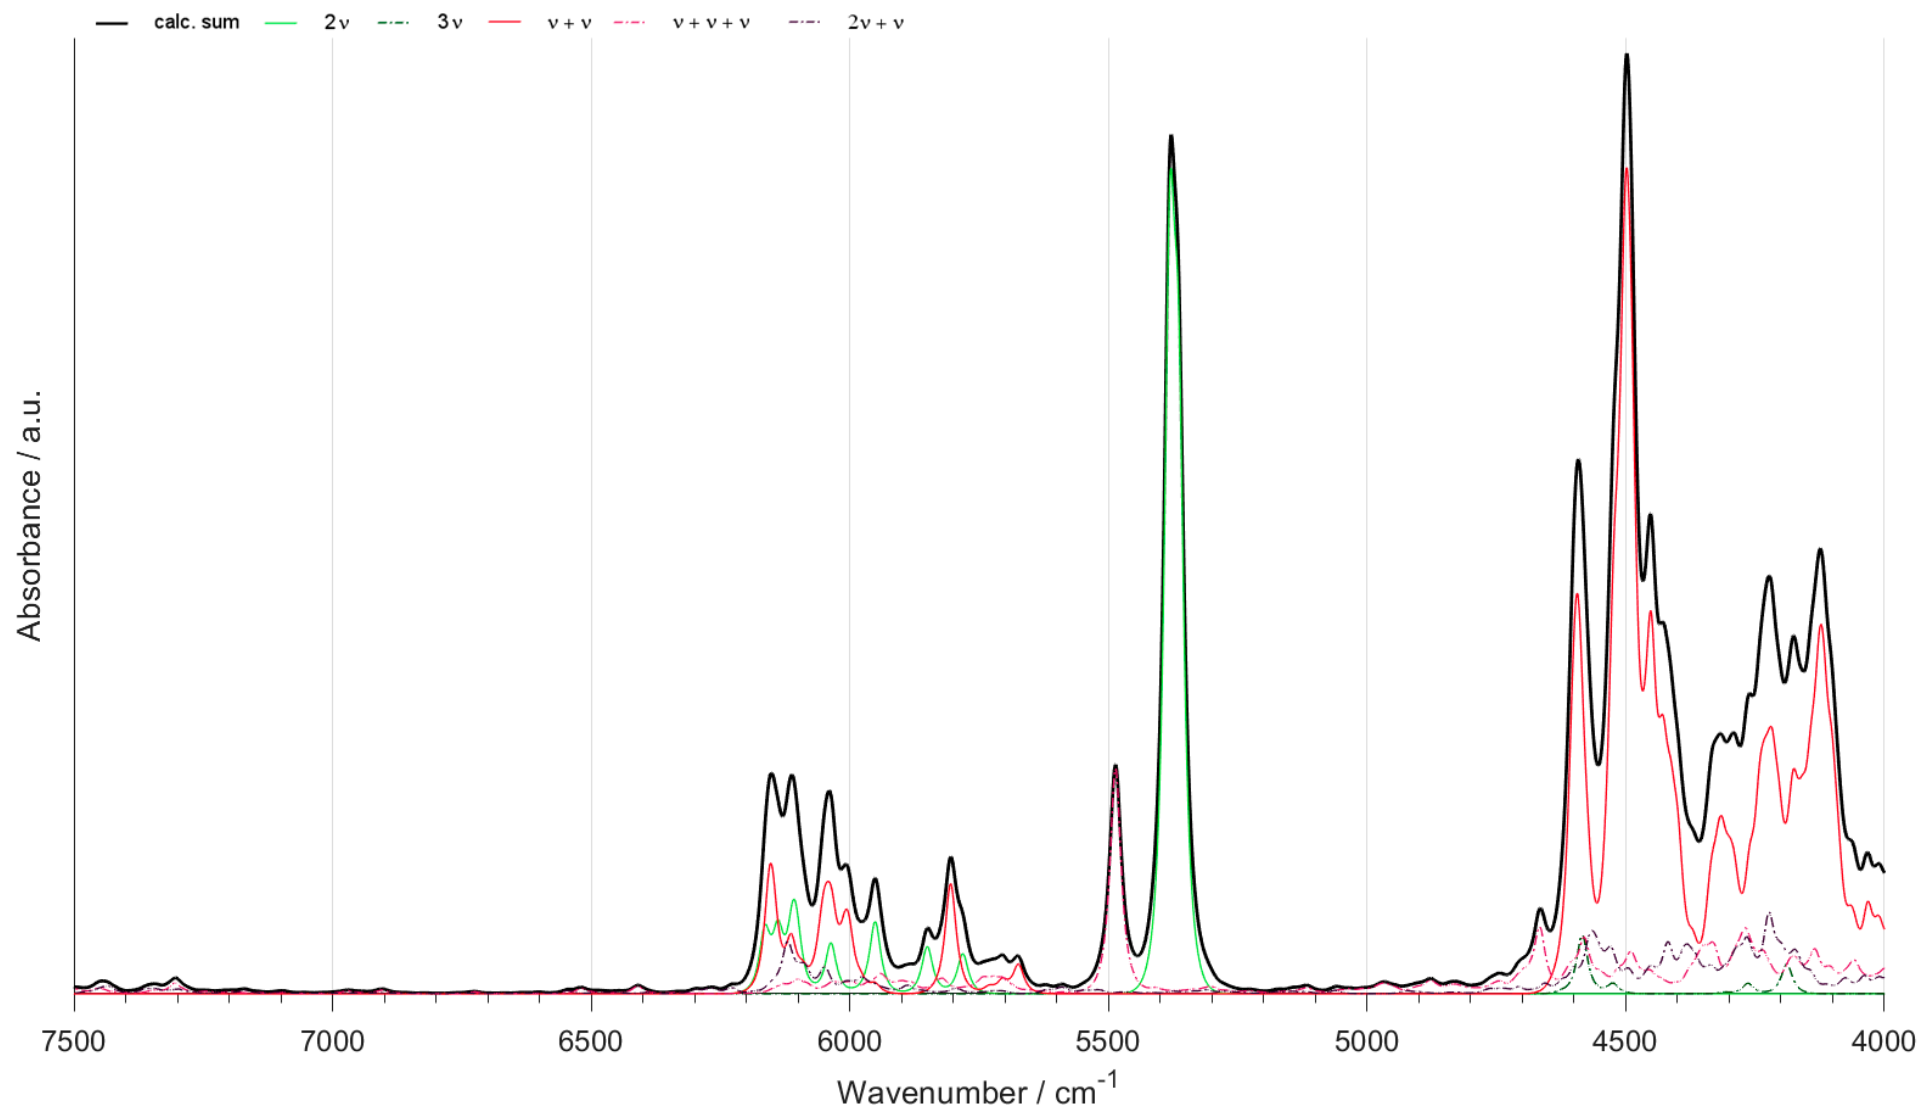

Figure S18. (High-resolution copy of Figure 2) NIR spectra of  $\text{CH}_3\text{CH}_2\text{OD}$  calculated with GVPT2 method at MP2/6-31G(d,p)//CPCM t level of electronic theory.

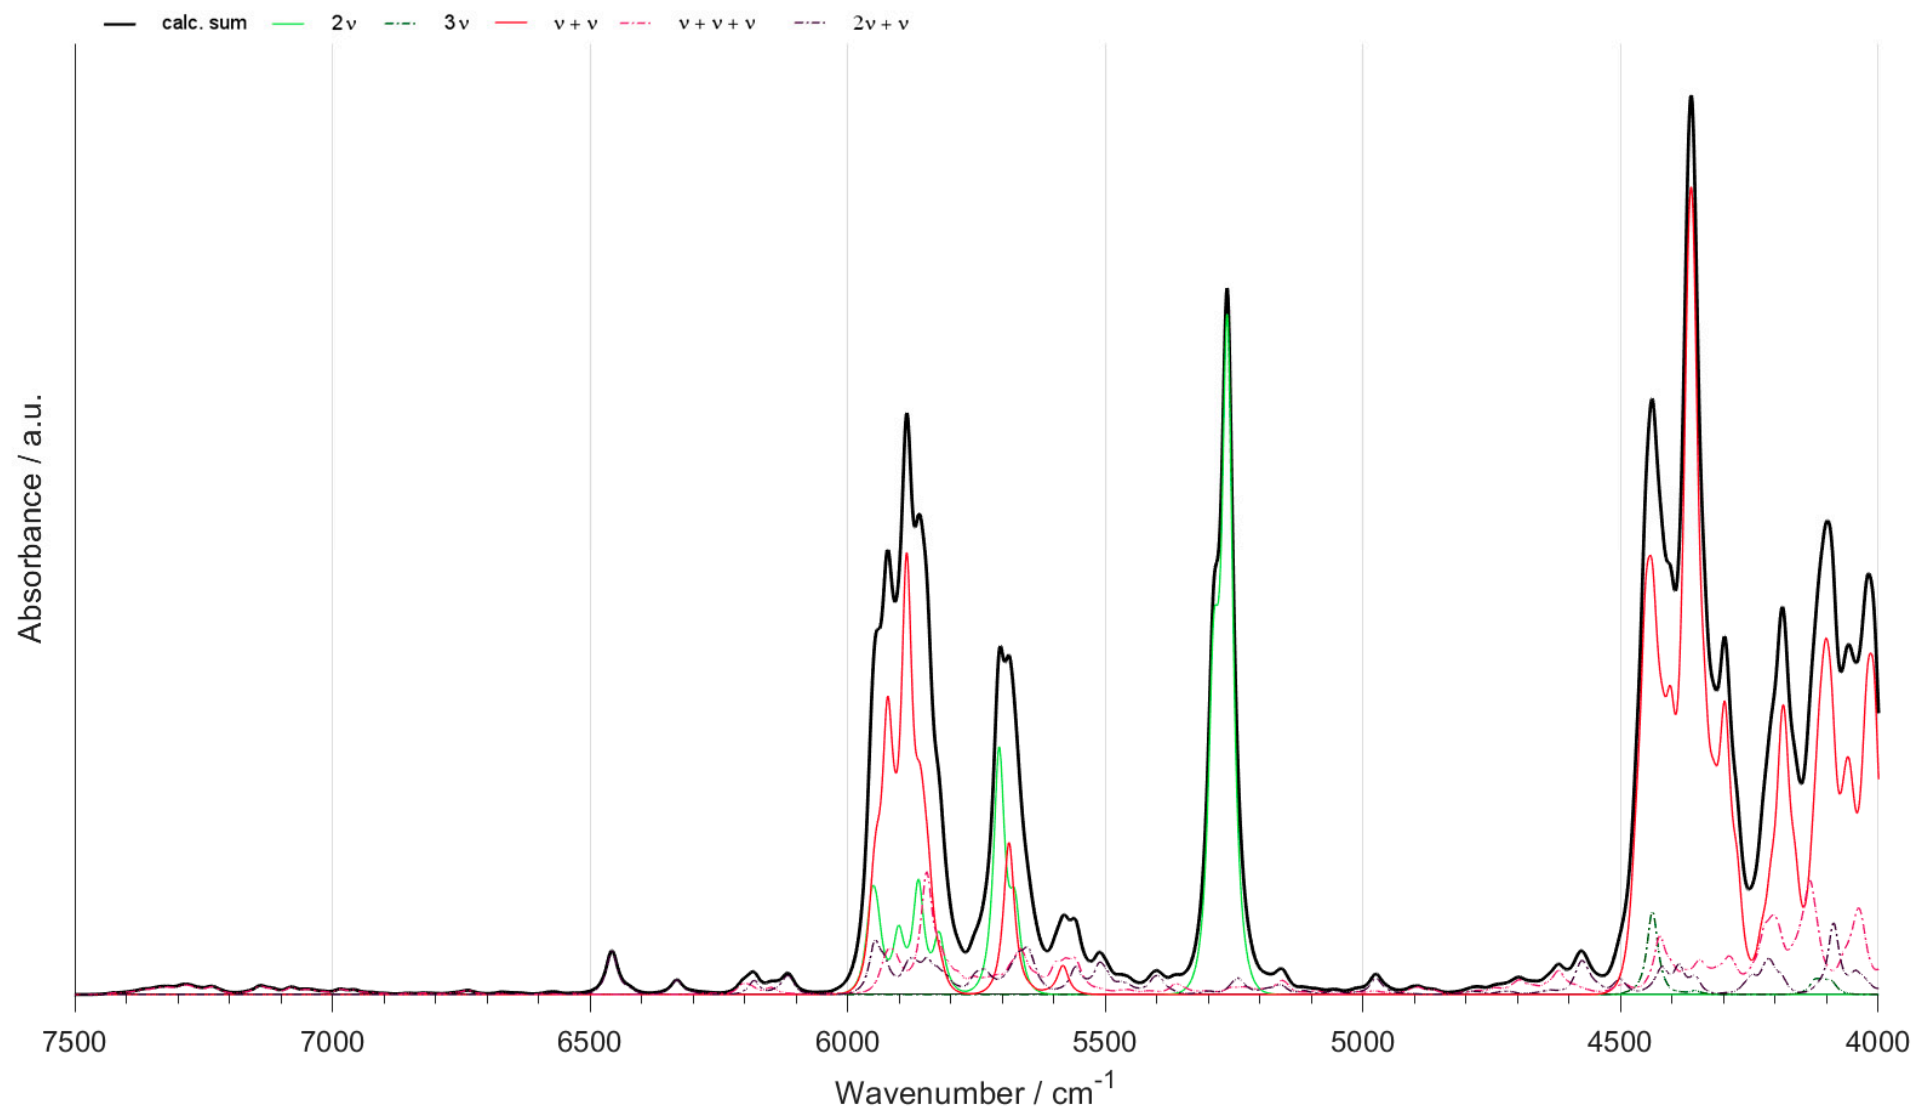

Figure S19. (High-resolution copy of Figure 2) NIR spectra of  $\text{CH}_3\text{CH}_2\text{OD}$  calculated with GVPT2 method at B3LYP-GD3BJ/SNST//CPCM level of electronic theory.

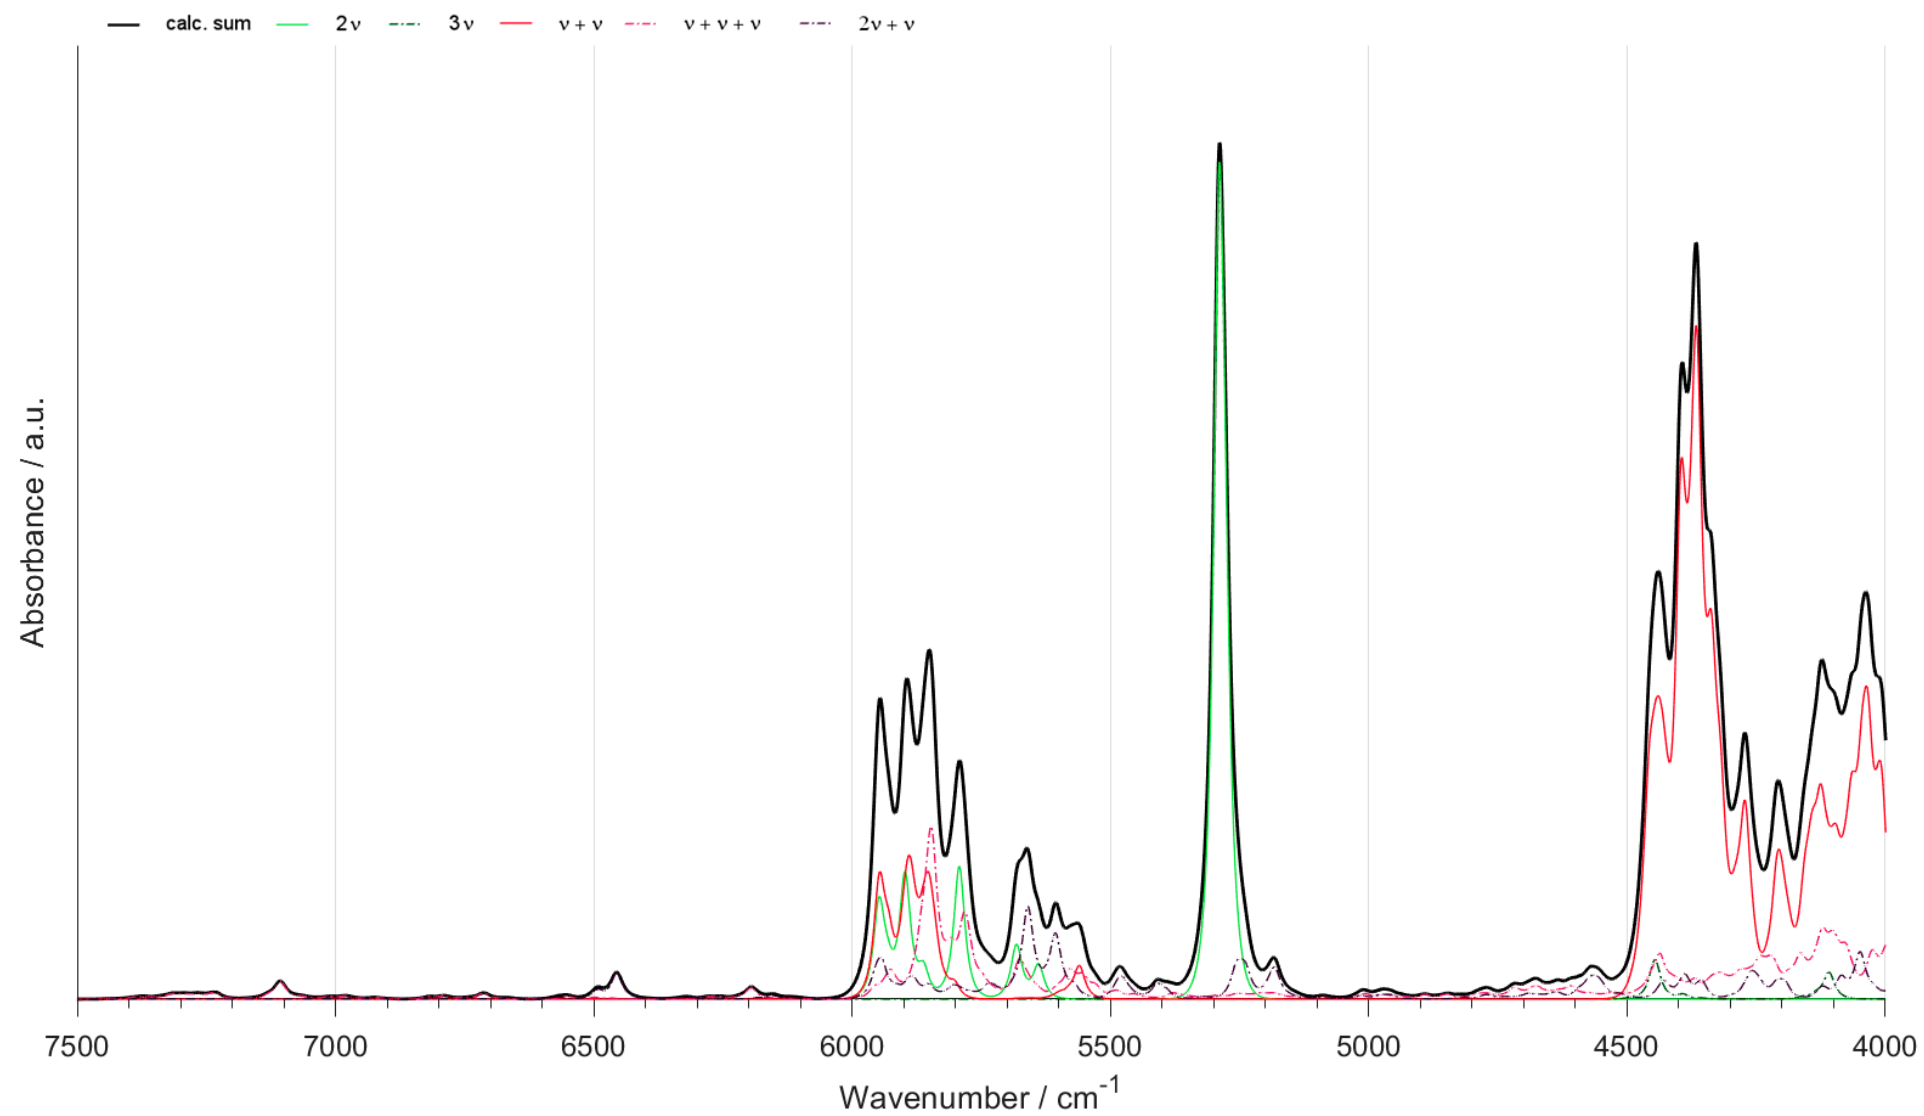

Figure S20. (High-resolution copy of Figure 2) NIR spectra of  $\text{CH}_3\text{CH}_2\text{OD}$  calculated with GVPT2 method at B2PLYP-GD3BJ/def2-TZVP//CPCM level of electronic theory.

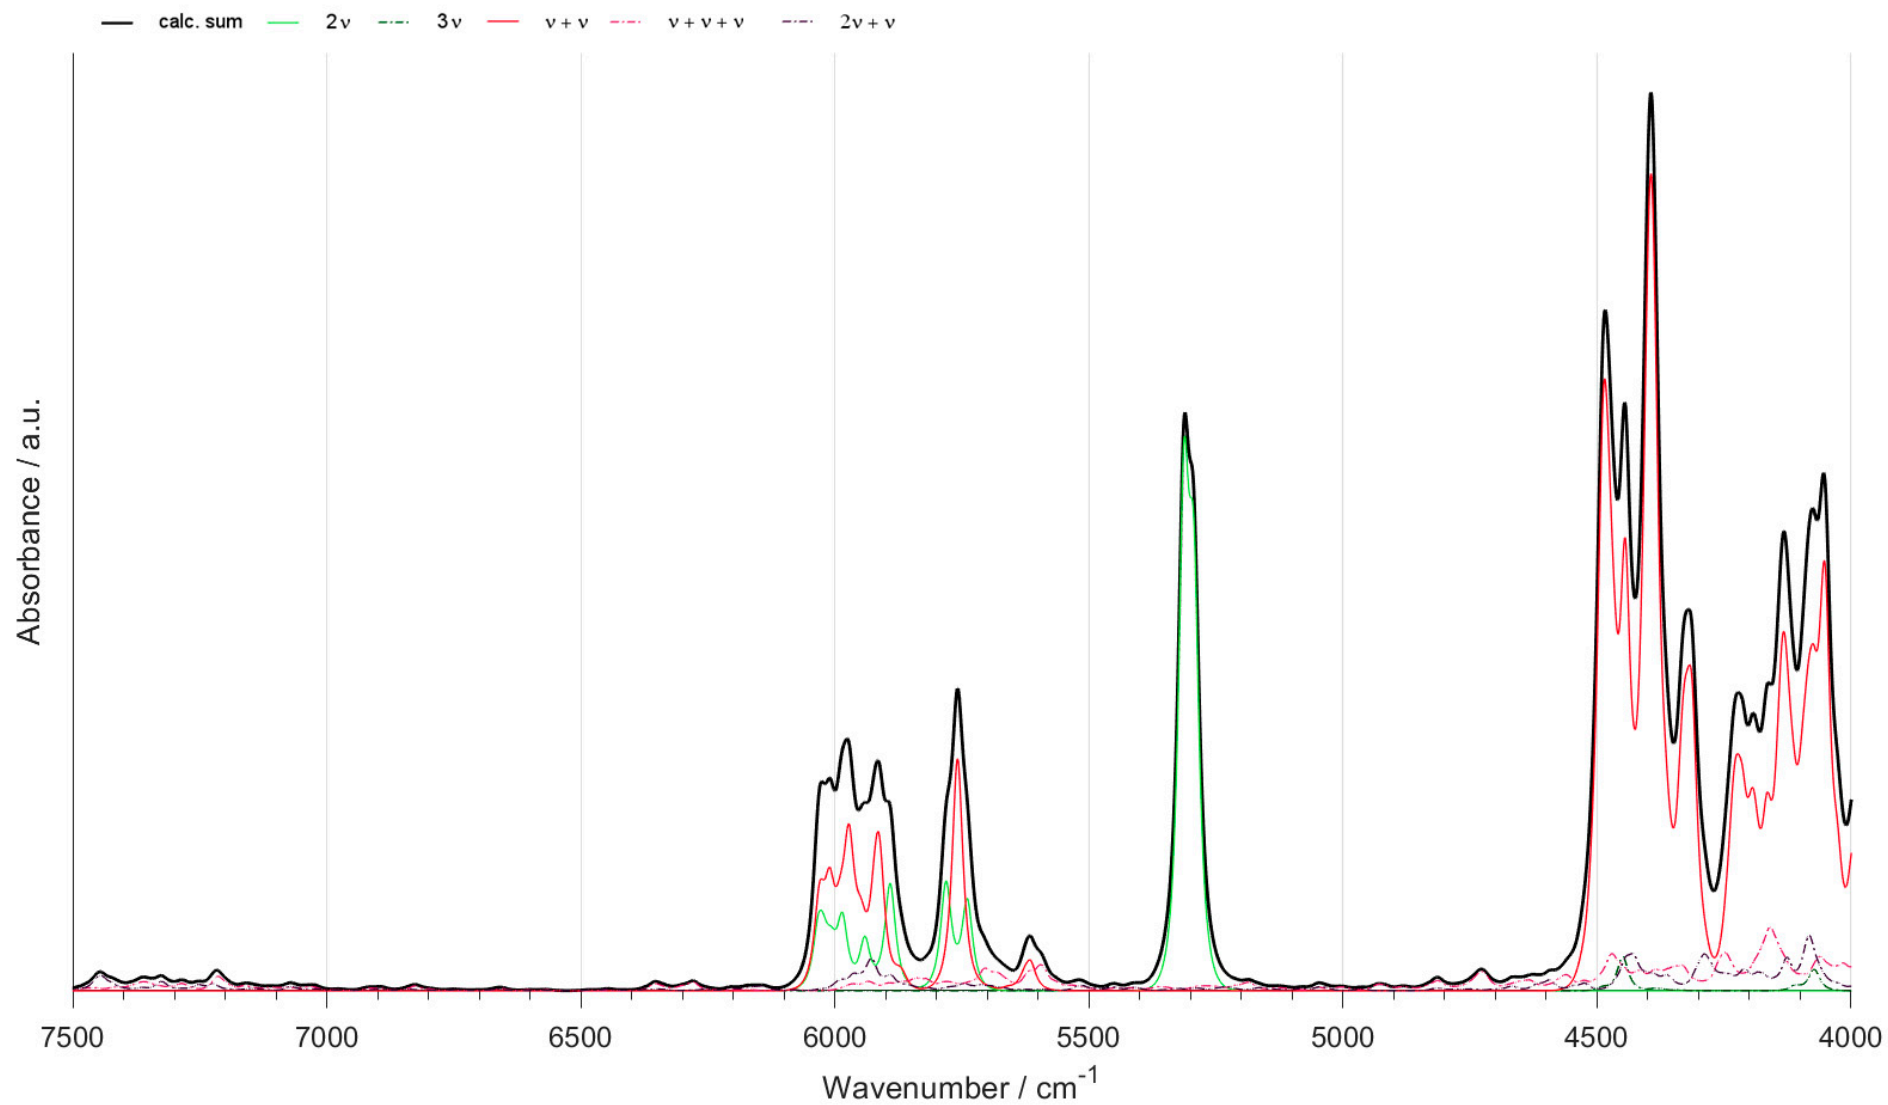

Figure S21. (High-resolution copy of Figure 2) NIR spectra of  $\text{CH}_3\text{CH}_2\text{OD}$  calculated with GVPT2 method at MP2/aug-cc-pVTZ//CPCM level of electronic theory.

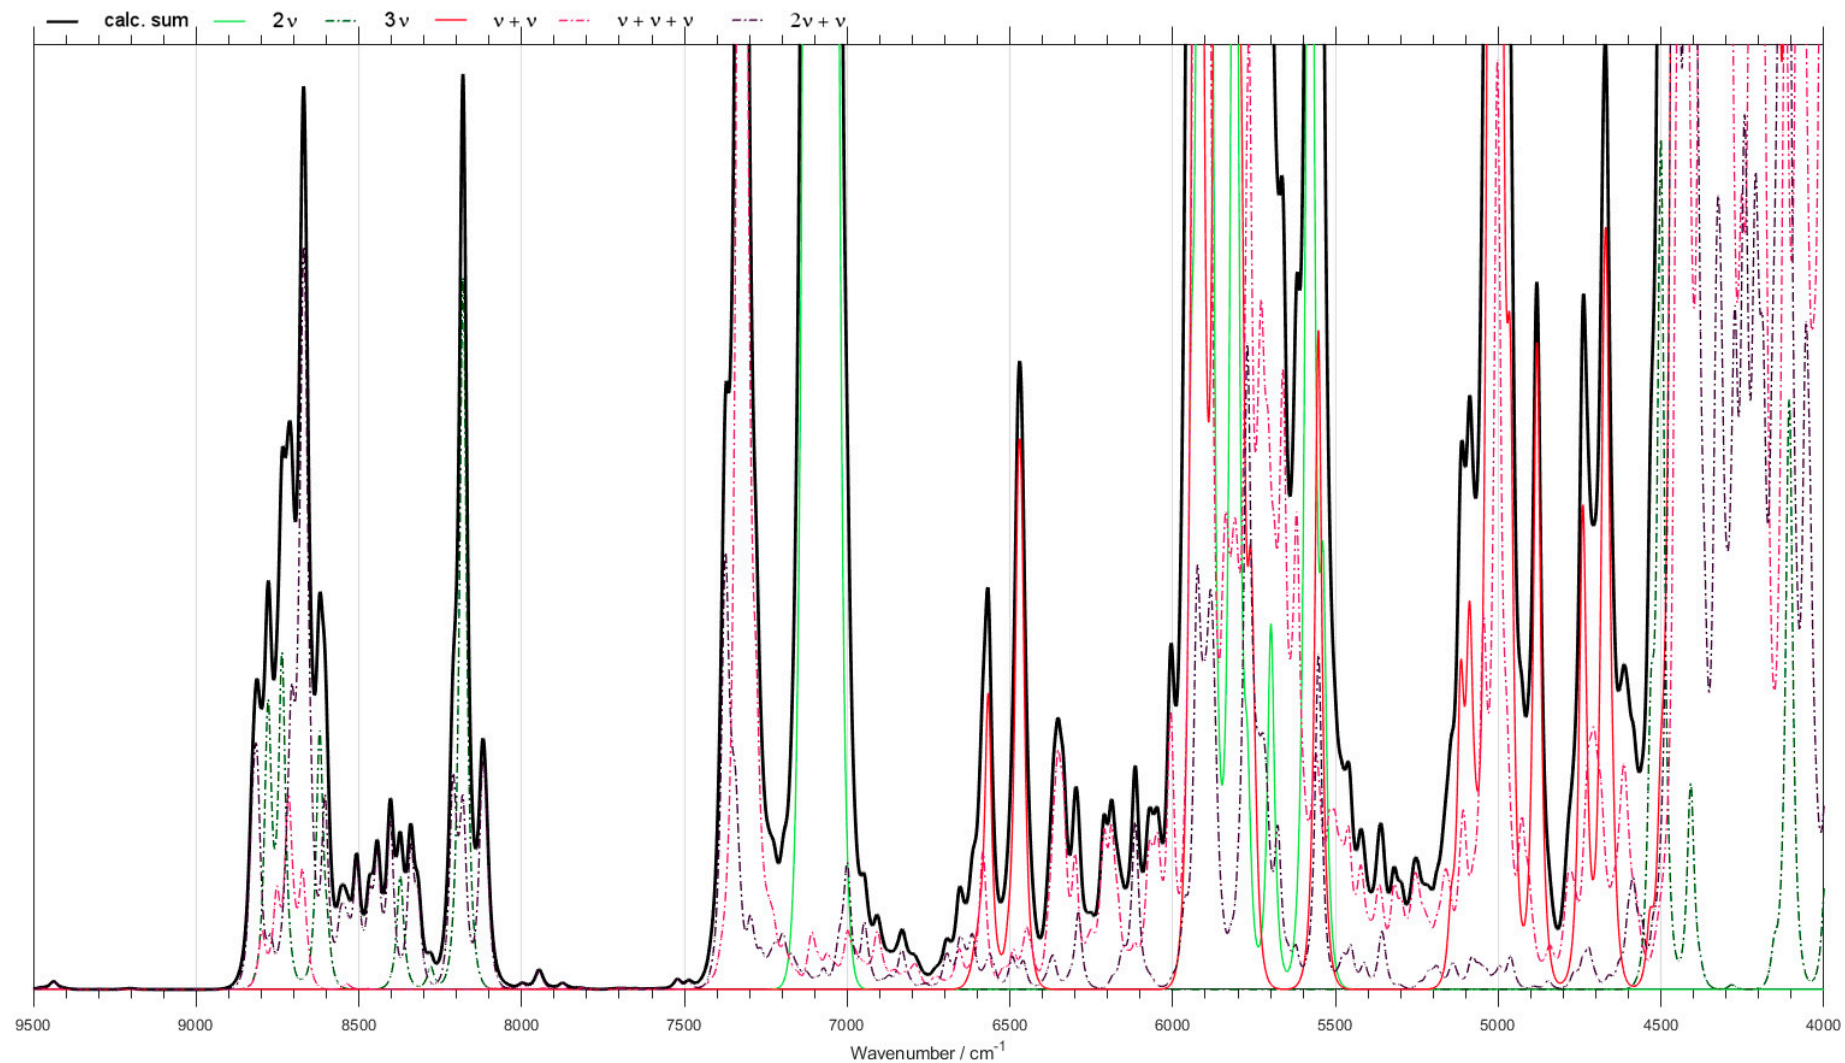

Figure S22. (High-resolution copy of Figure 3) Contributions from minor bands in NIR spectra of  $\text{CH}_3\text{CH}_2\text{OH}$  calculated with GVPT2 method at B3LYP-GD3BJ /6-31G(d,p) level of electronic theory.

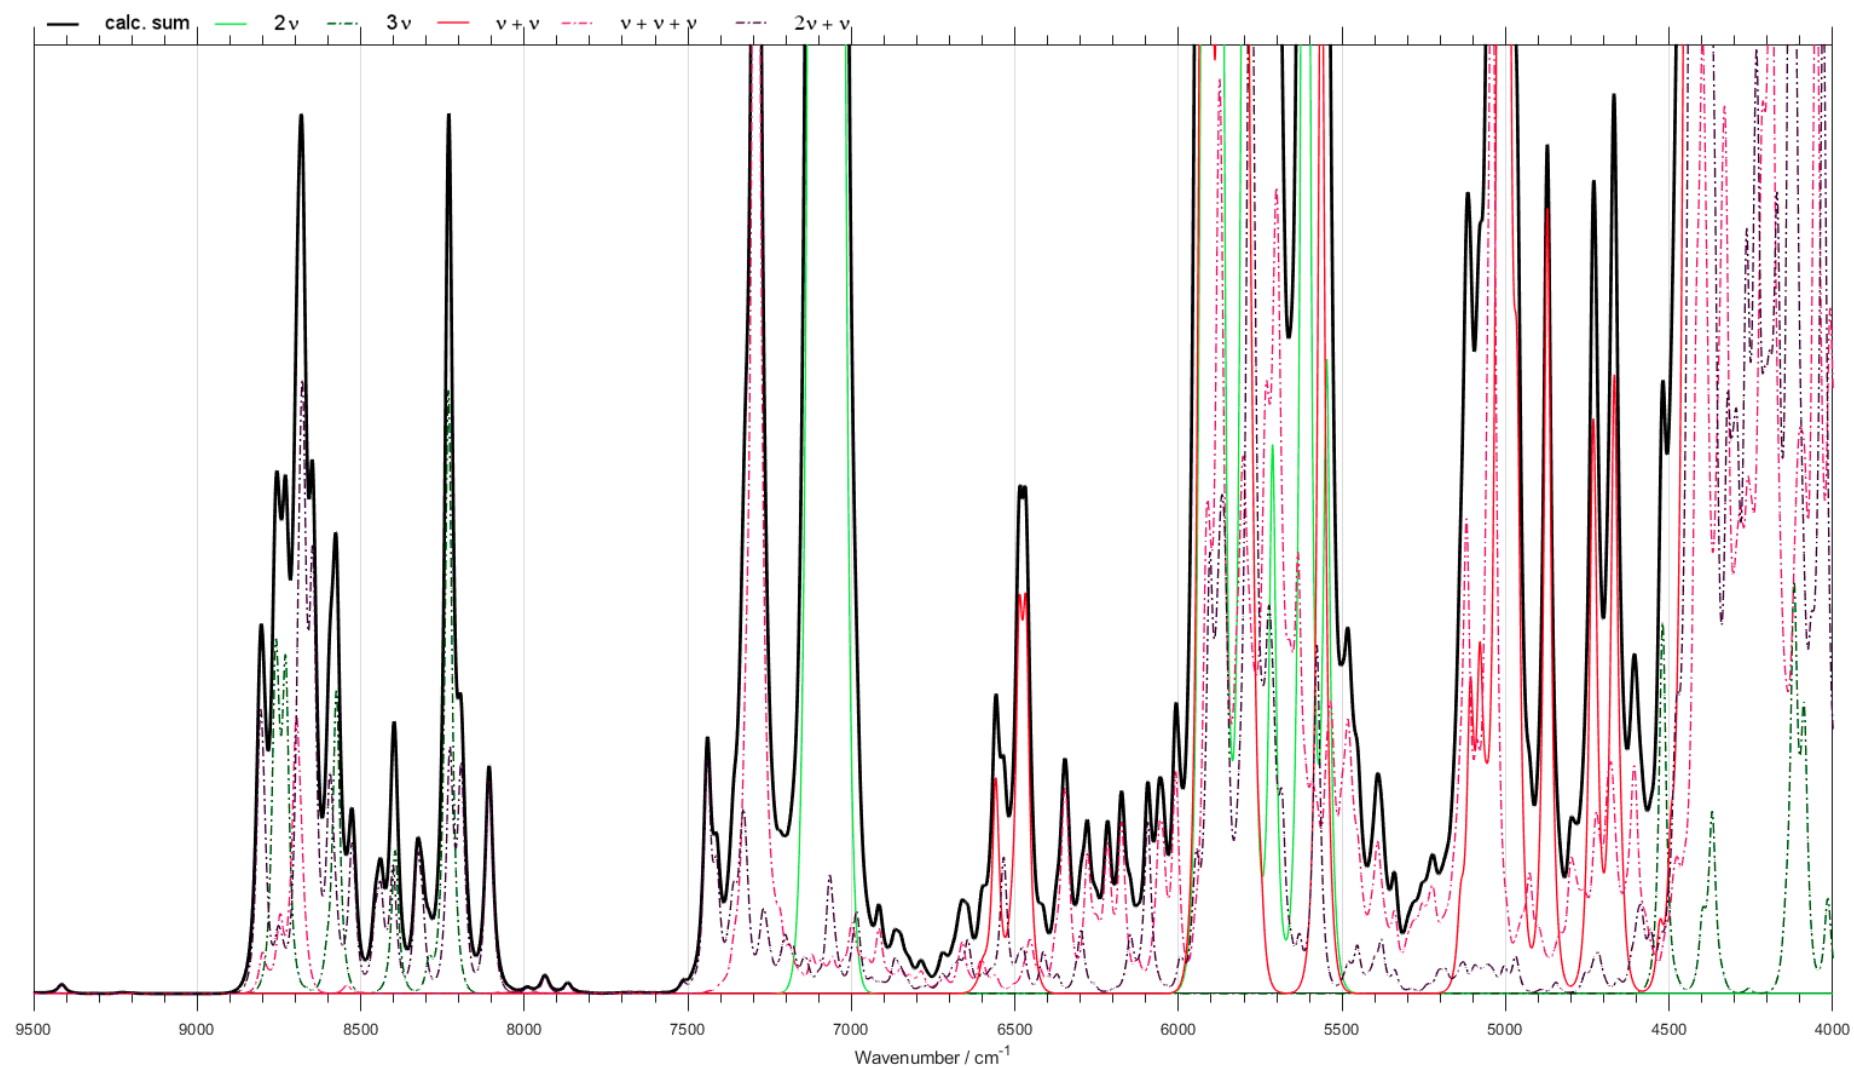

Figure S23. (High-resolution copy of Figure 3) Contributions from minor bands in NIR spectra of  $\text{CH}_3\text{CH}_2\text{OH}$  calculated with GVPT2 method at B3LYP-GD3BJ/6-31G(d,p)//CPCM level of electronic theory.



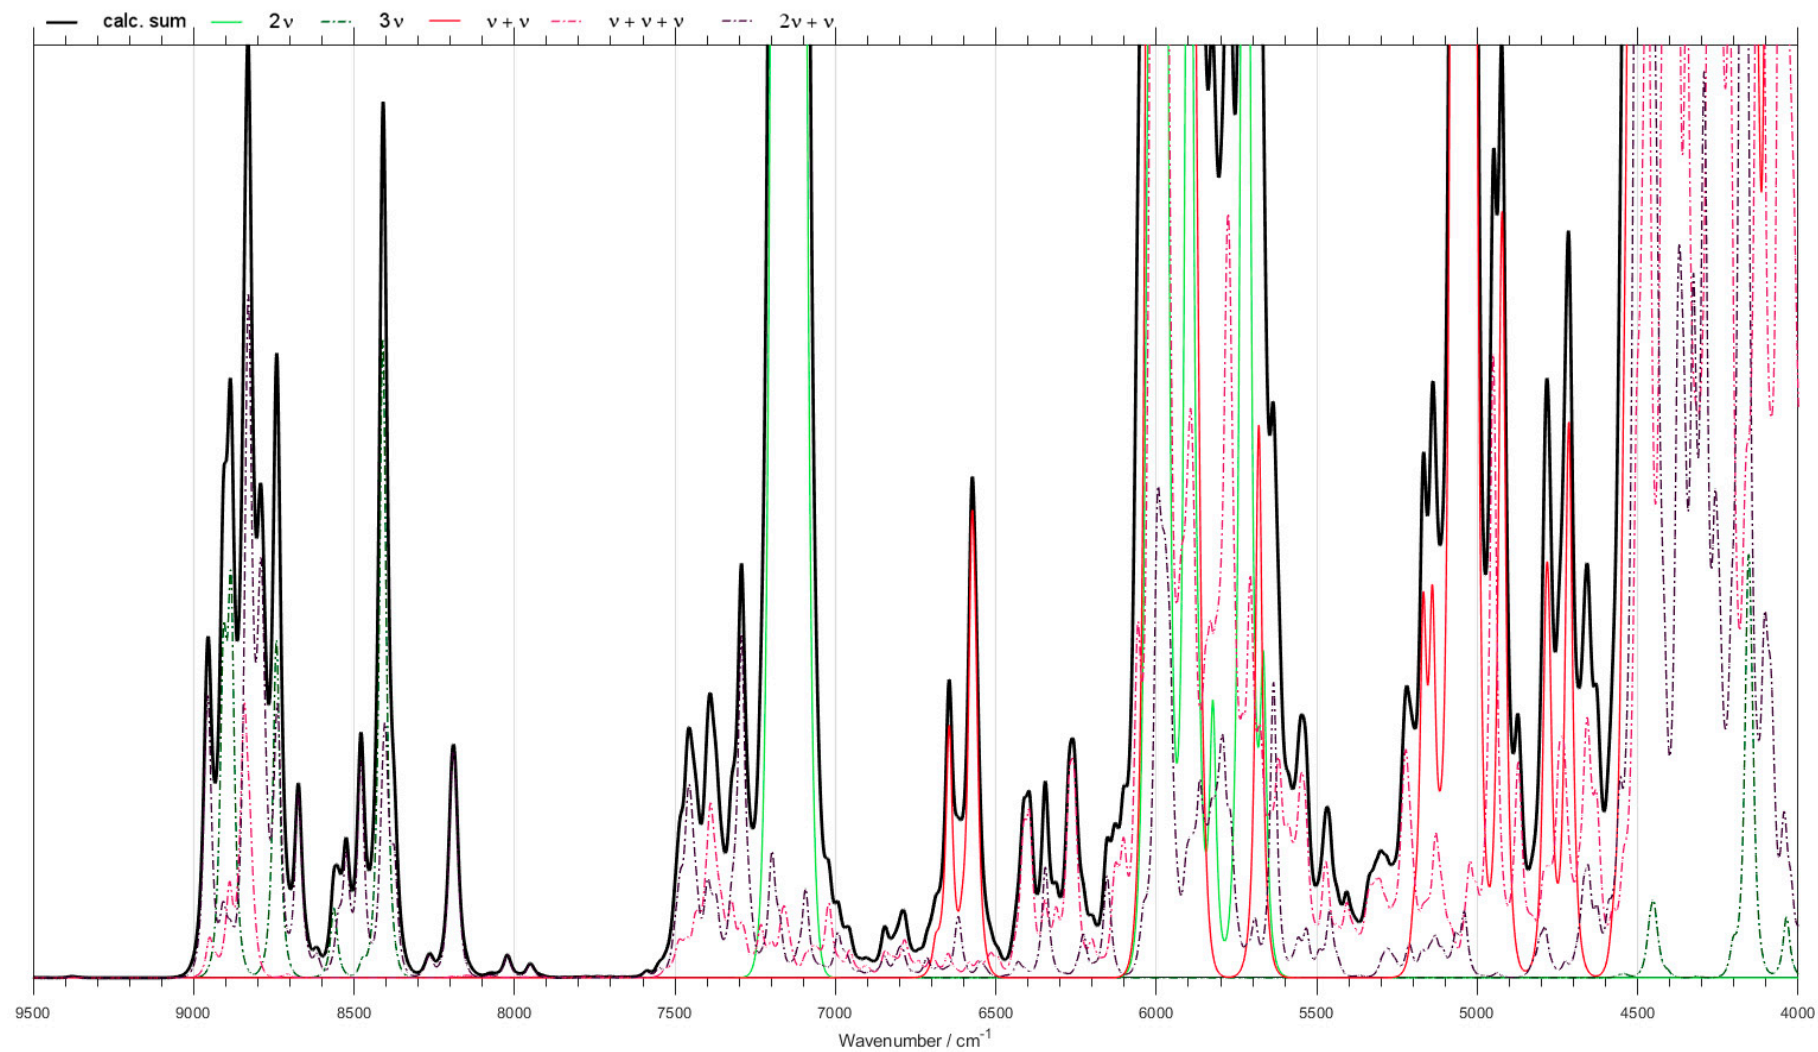

Figure S24. (High-resolution copy of Figure 3) Contributions from minor bands in NIR spectra of  $\text{CH}_3\text{CH}_2\text{OH}$  calculated with GVPT2 method at B2PLYP-GD3BJ/6-31G(d,p)//CPCM level of electronic theory.

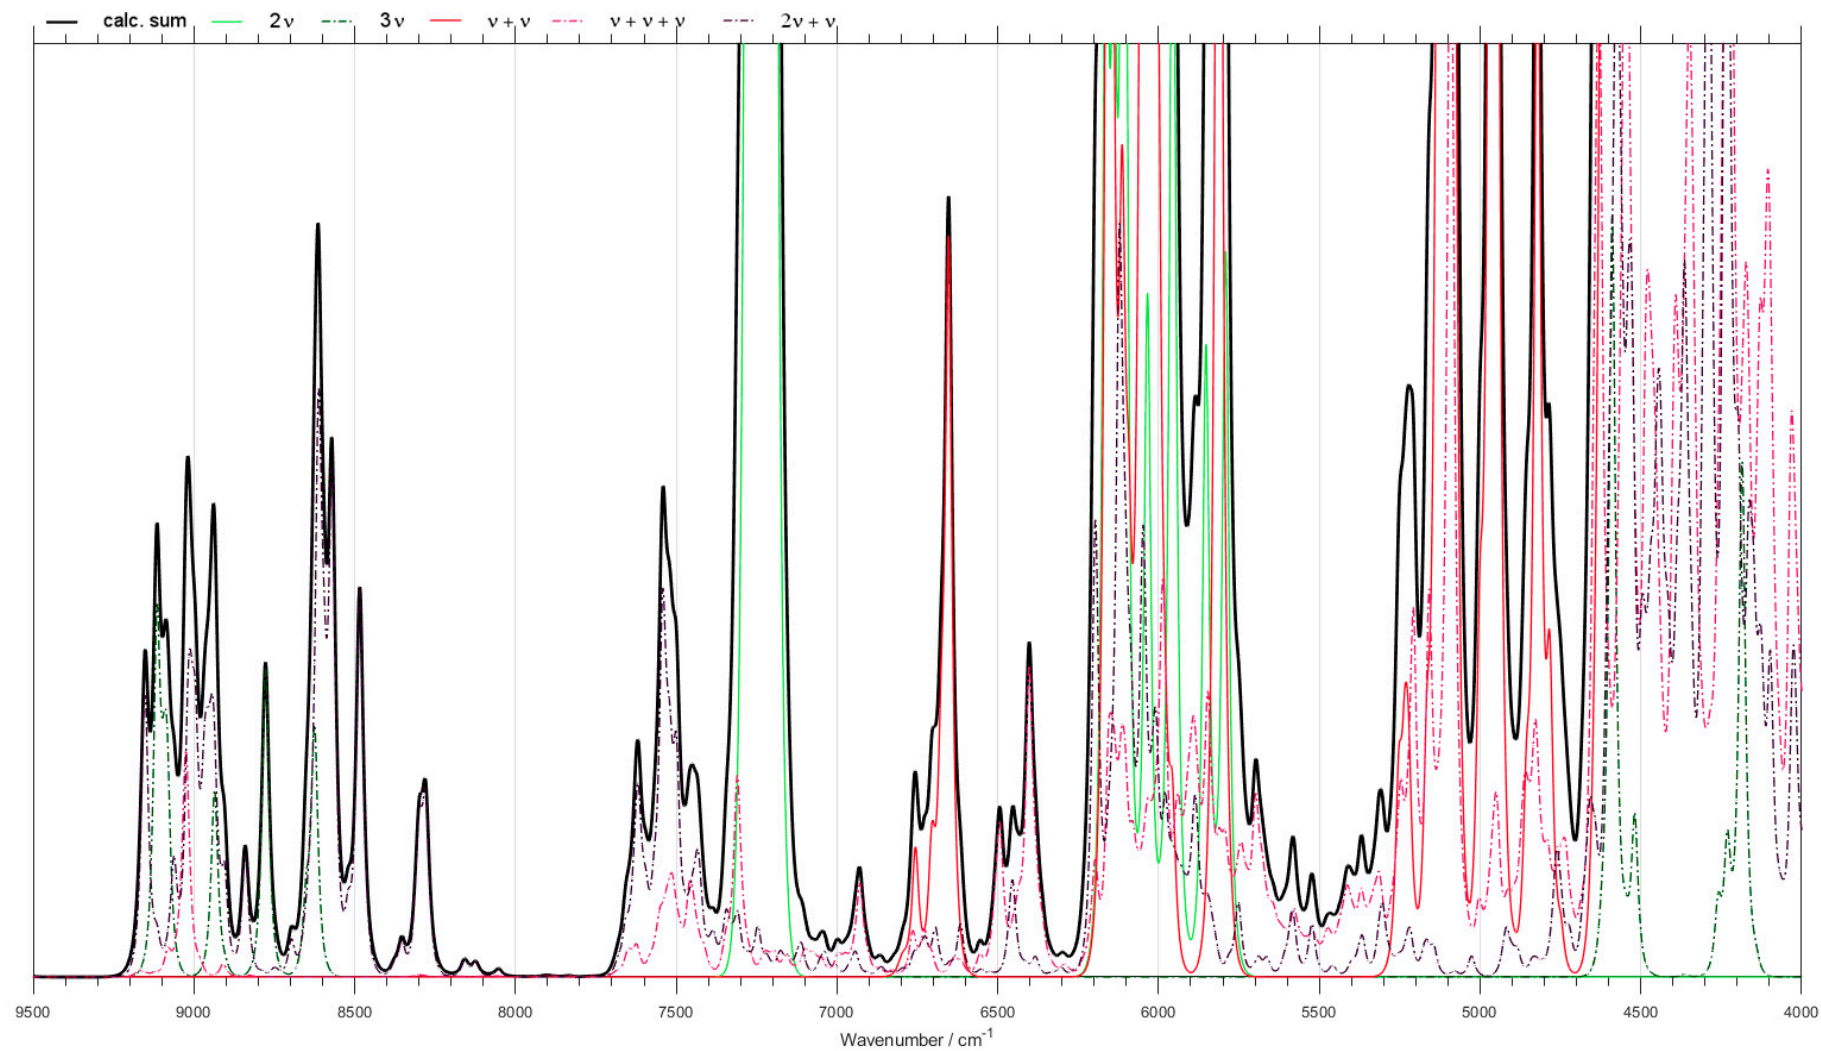

Figure S25. (High-resolution copy of Figure 2) Contributions from minor bands in NIR spectra of  $\text{CH}_3\text{CH}_2\text{OH}$  calculated with GVPT2 method at MP2/6-31G(d,p)//CPCM level of electronic theory.

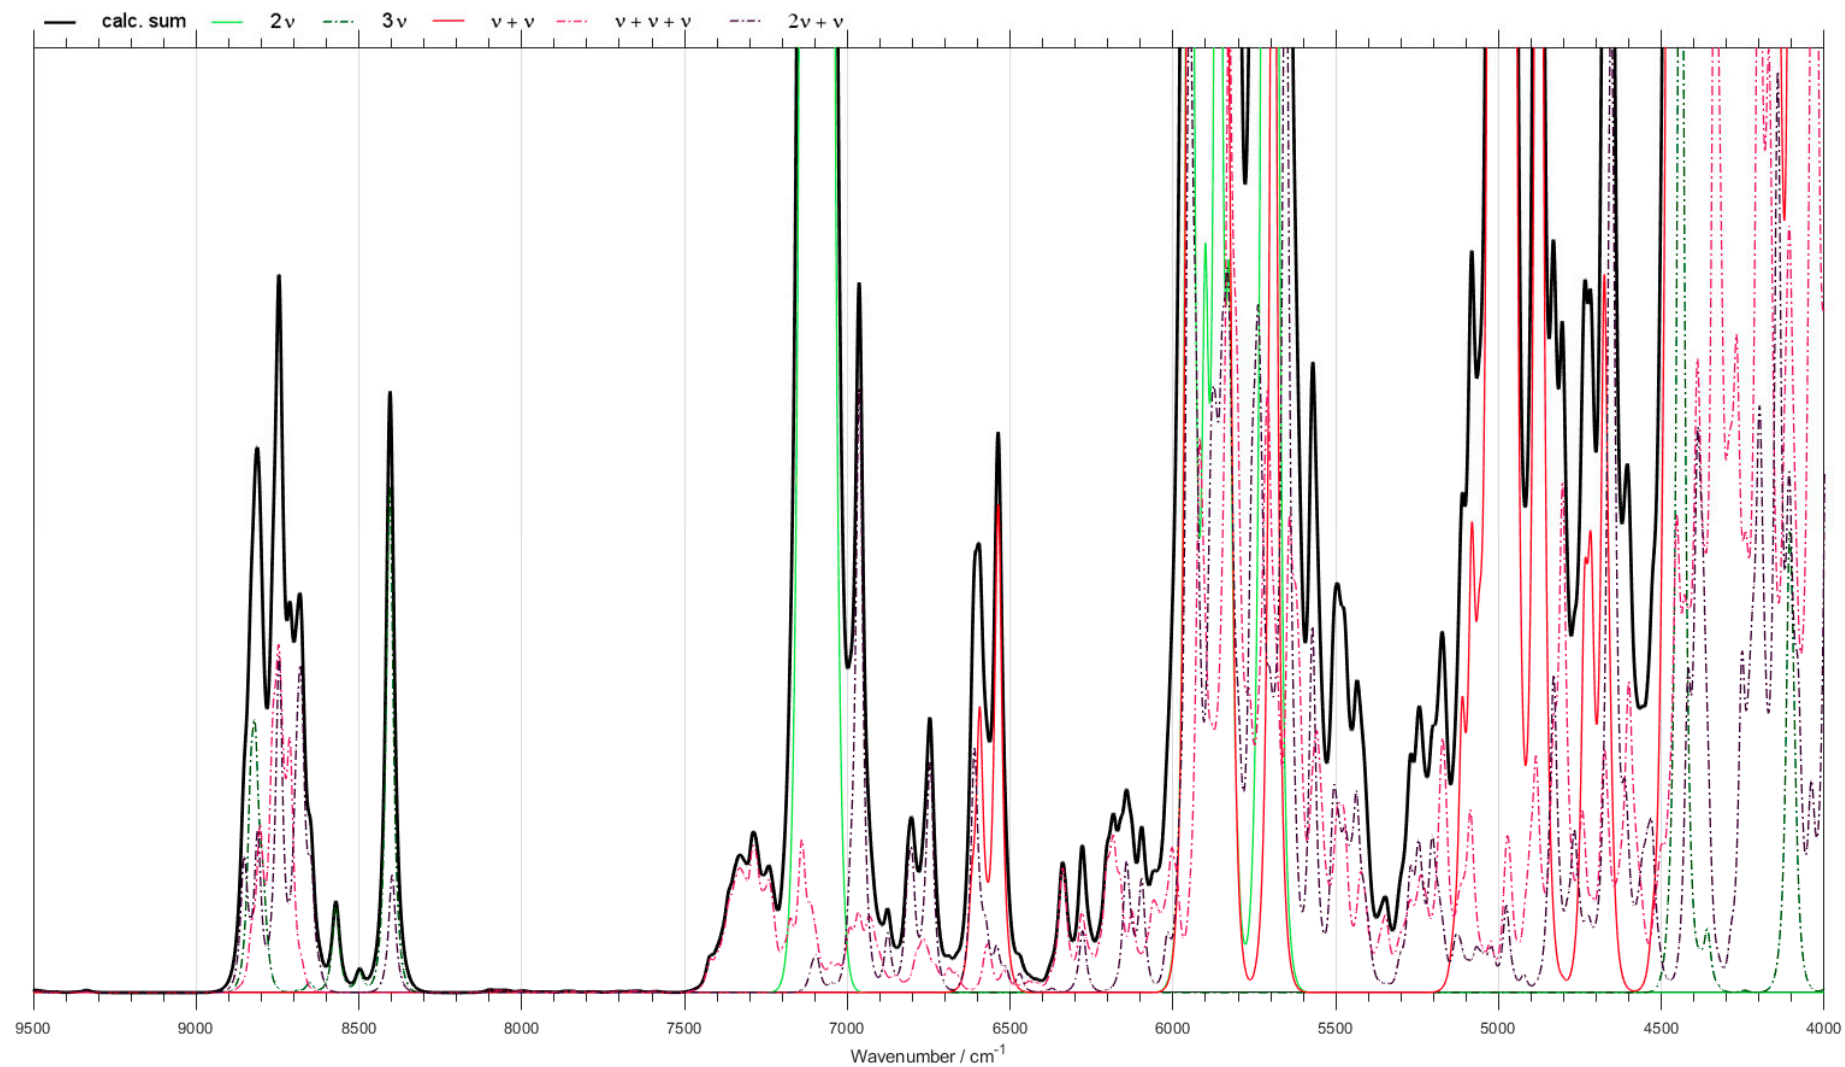

Figure S26. (High-resolution copy of Figure 3) Contributions from minor bands in NIR spectra of  $\text{CH}_3\text{CH}_2\text{OH}$  calculated with GVPT2 method at B3LYP-GD3BJ/SNST//CPCM level of electronic theory.

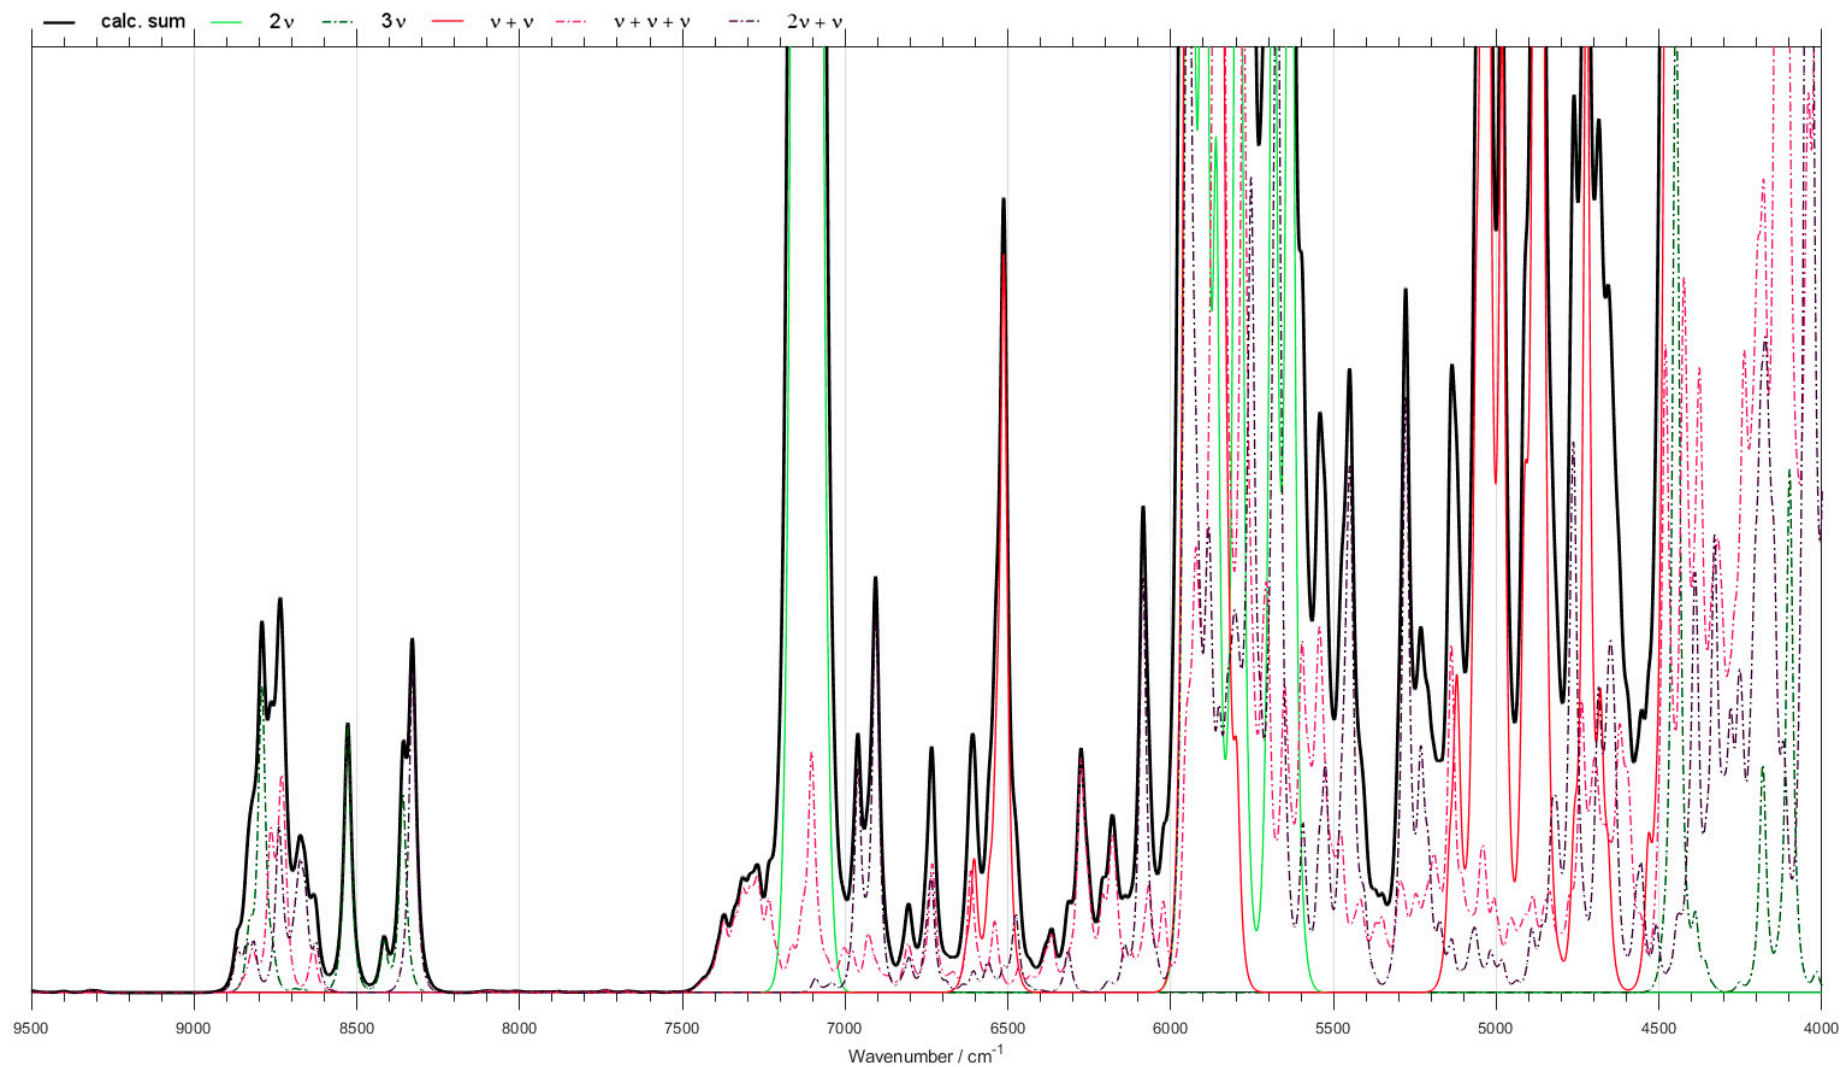

Figure S27. (High-resolution copy of Figure 3) Contributions from minor bands in NIR spectra of  $\text{CH}_3\text{CH}_2\text{OH}$  calculated with GVPT2 method at B2PLYP-GD3BJ/def2-TZVP//CPCM level of electronic theory.

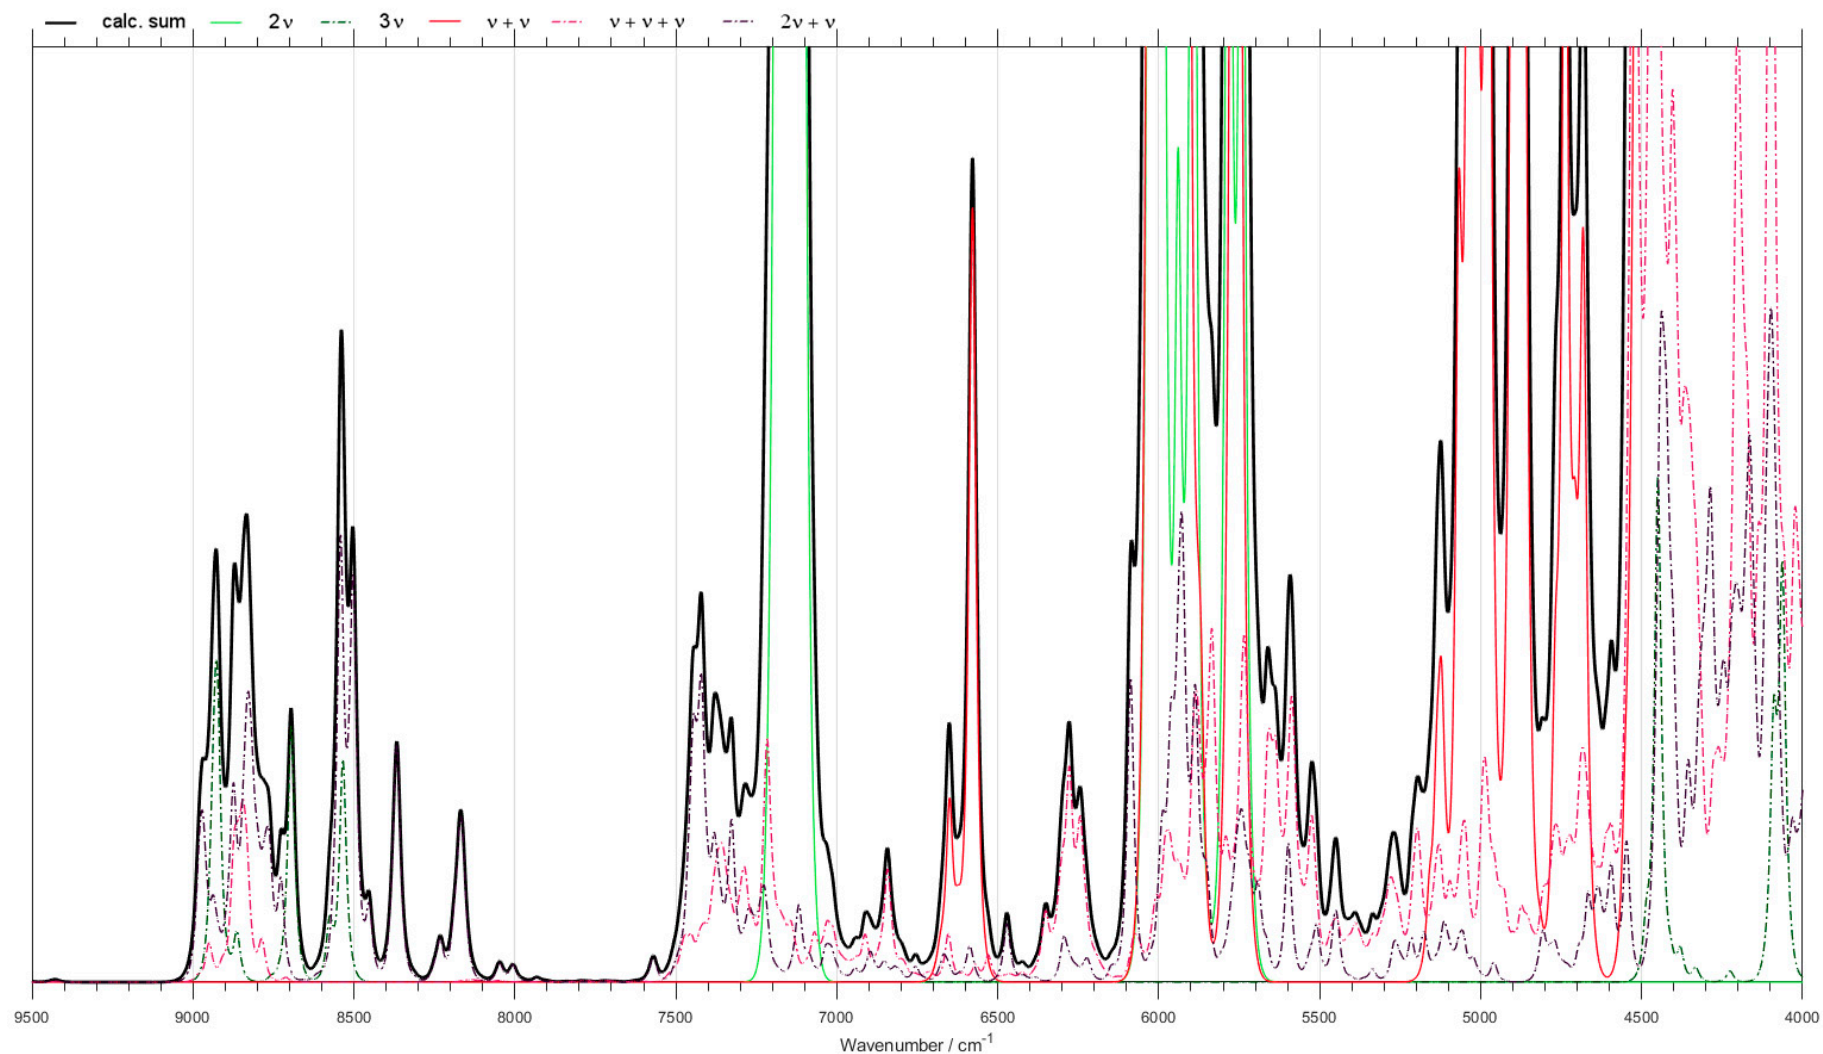

Figure S28. (High-resolution copy of Figure 3) Contributions from minor bands in NIR spectra of  $\text{CH}_3\text{CH}_2\text{OH}$  calculated with GVPT2 method at MP2/aug-cc-pVTZ//CPCM level of electronic theory.

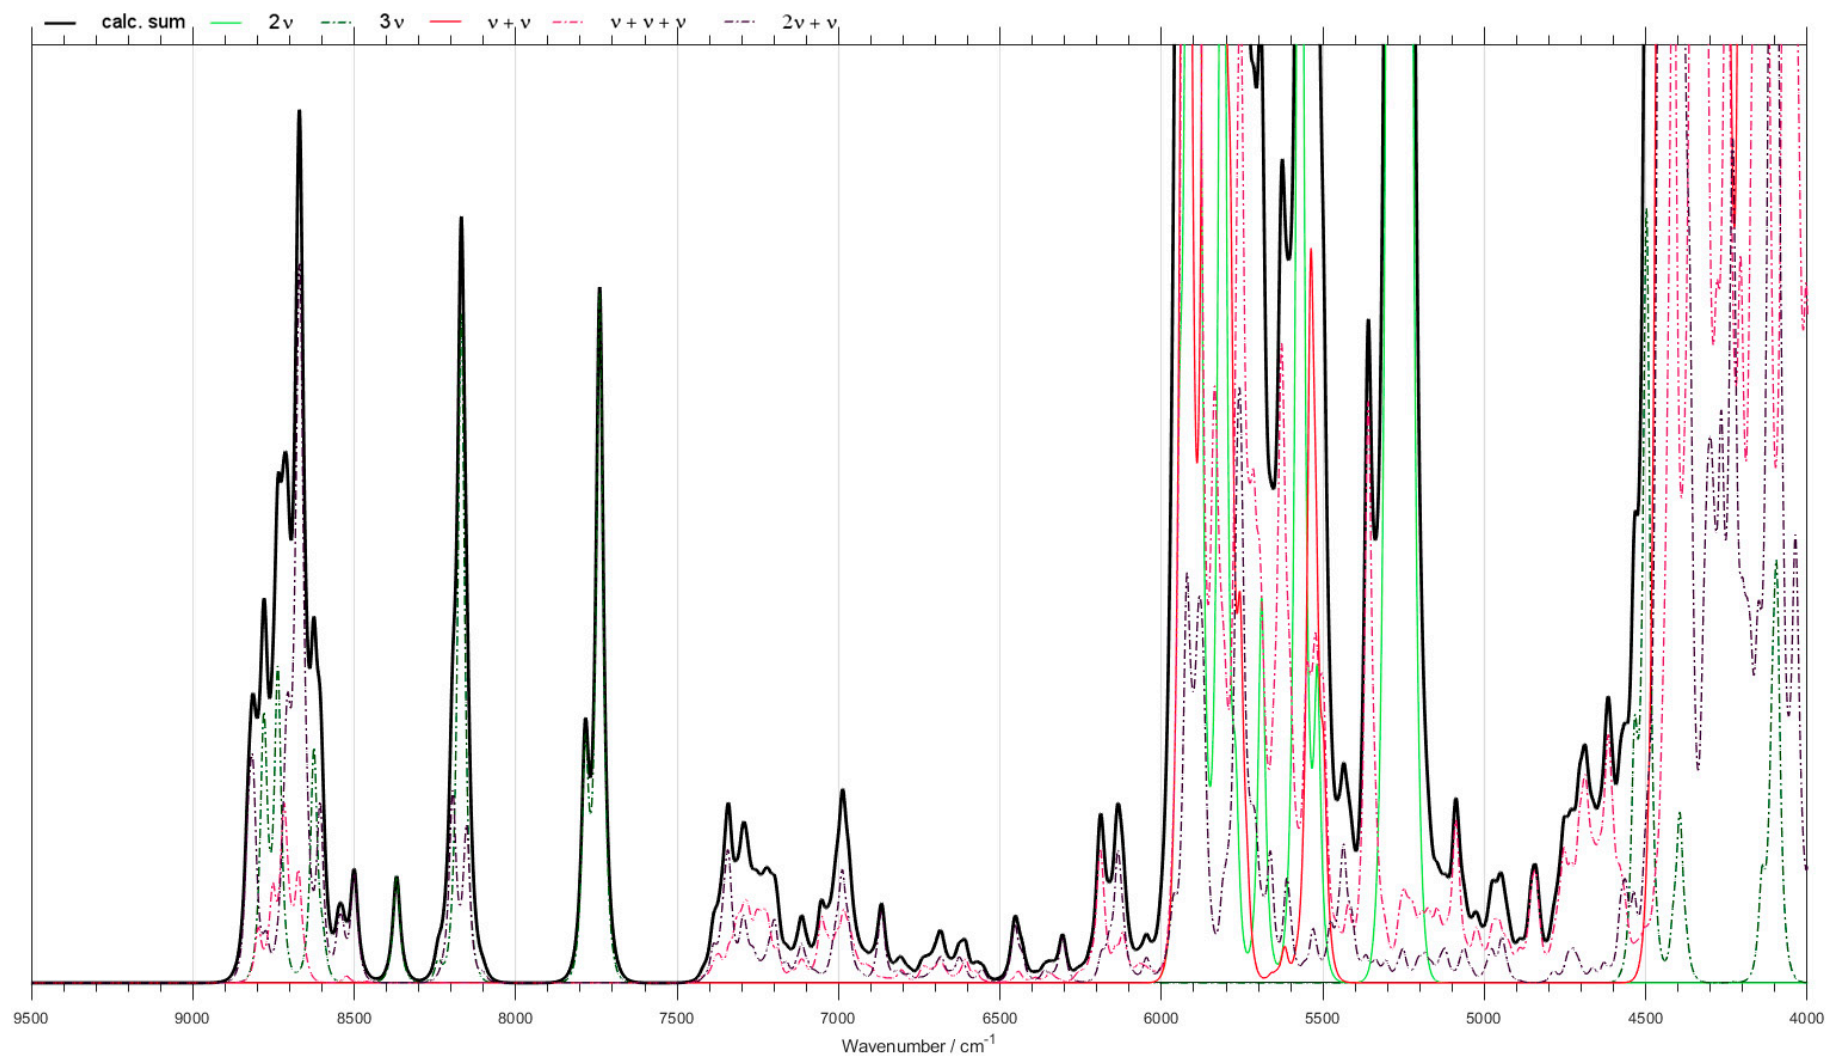

Figure S29. (High-resolution copy of Figure 4) Contributions from minor bands in NIR spectra of  $\text{CH}_3\text{CH}_2\text{OD}$  calculated with GVPT2 method at B3LYP-GD3BJ /6-31G(d,p) level of electronic theory.

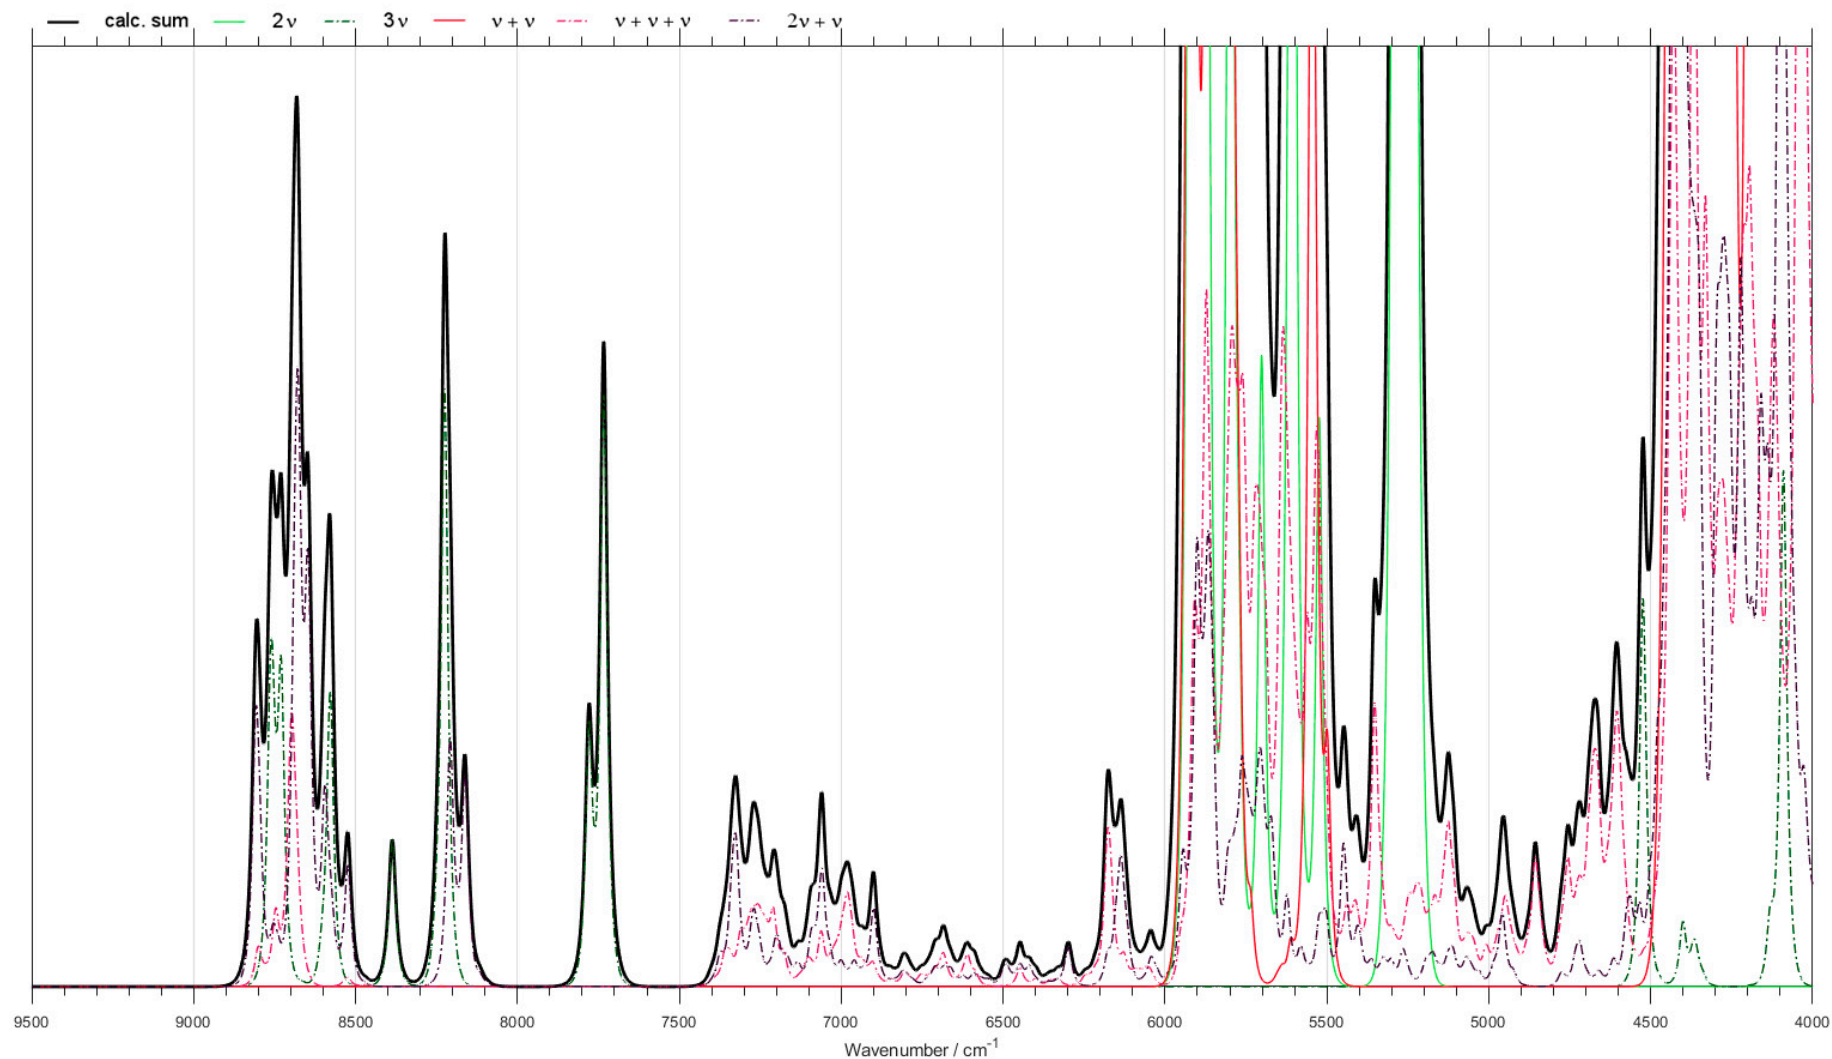

Figure S30. (High-resolution copy of Figure 4) Contributions from minor bands in NIR spectra of CH<sub>3</sub>CH<sub>2</sub>OD calculated with GVPT2 method at B3LYP-GD3BJ/6-31G(d,p)//CPCM level of electronic theory.

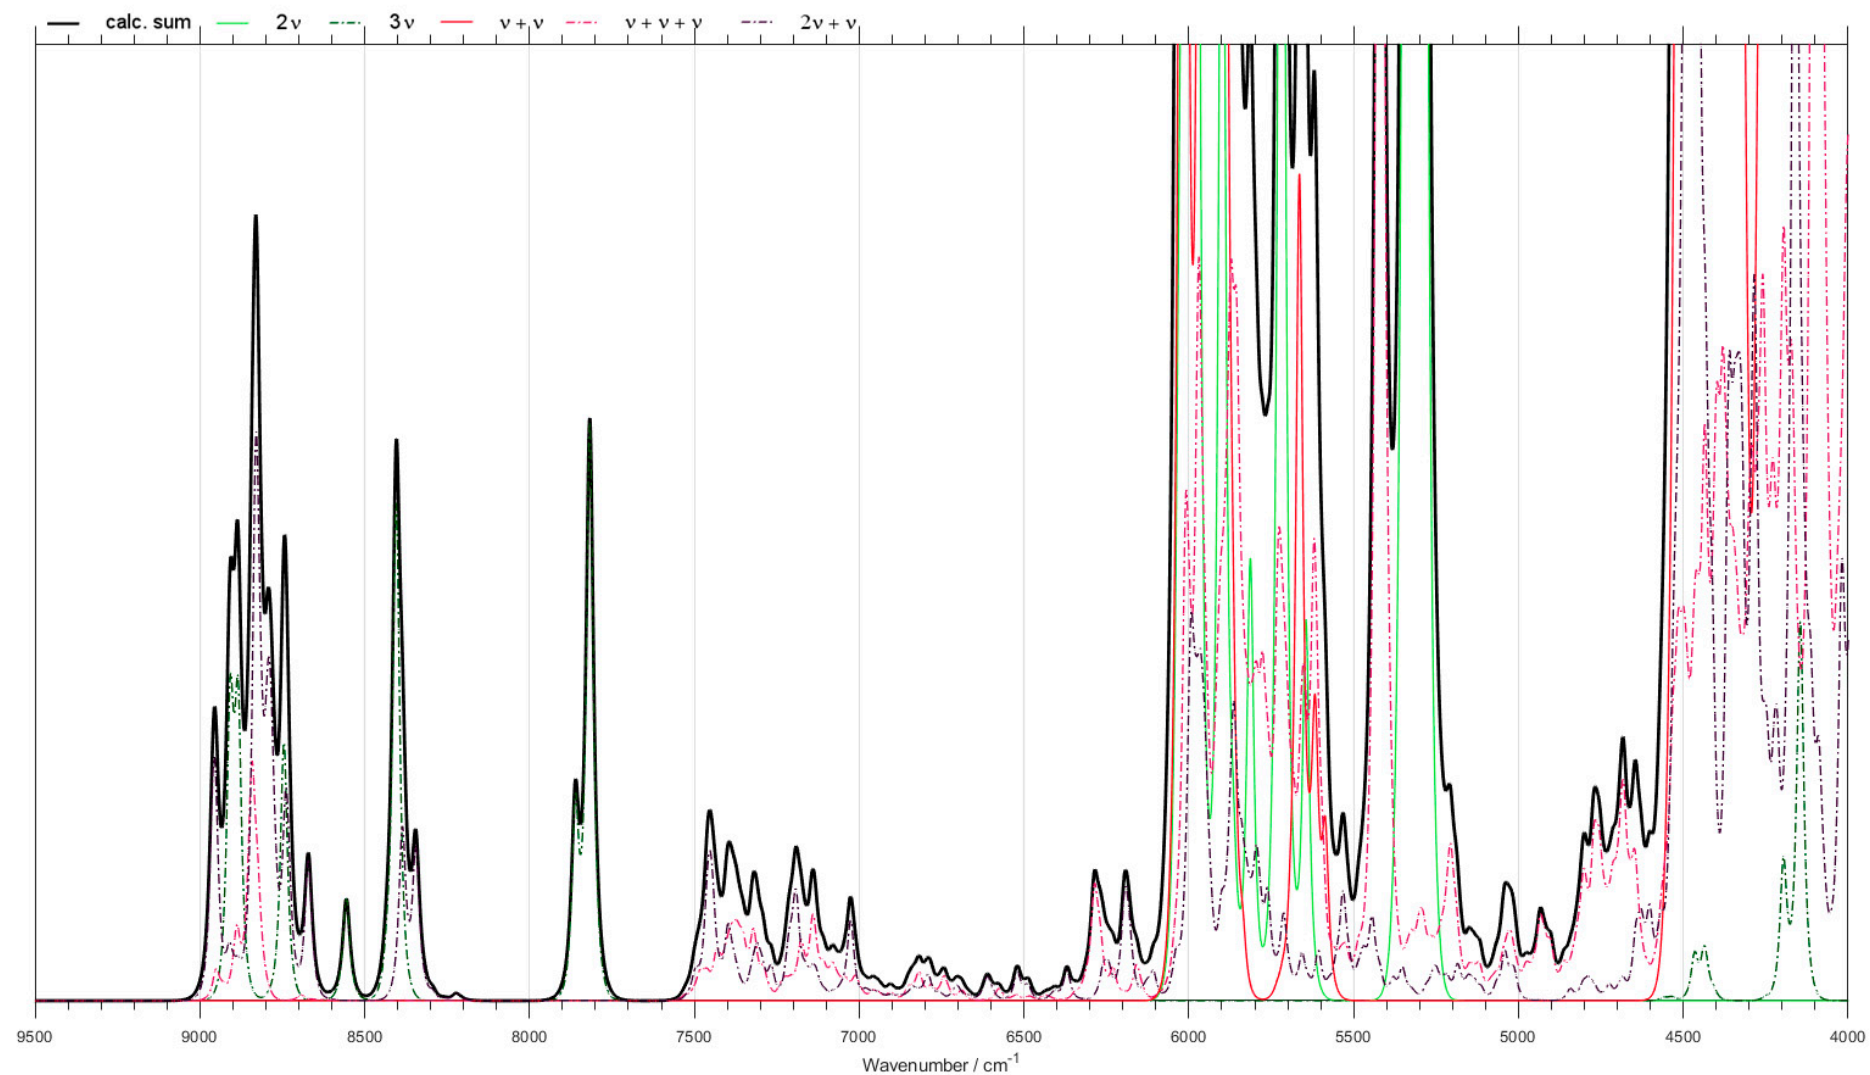

Figure S31. (High-resolution copy of Figure 4) Contributions from minor bands in NIR spectra of  $\text{CH}_3\text{CH}_2\text{OD}$  calculated with GVPT2 method at B2PLYP-GD3BJ/6-31G(d,p)//CPCM level of electronic theory.



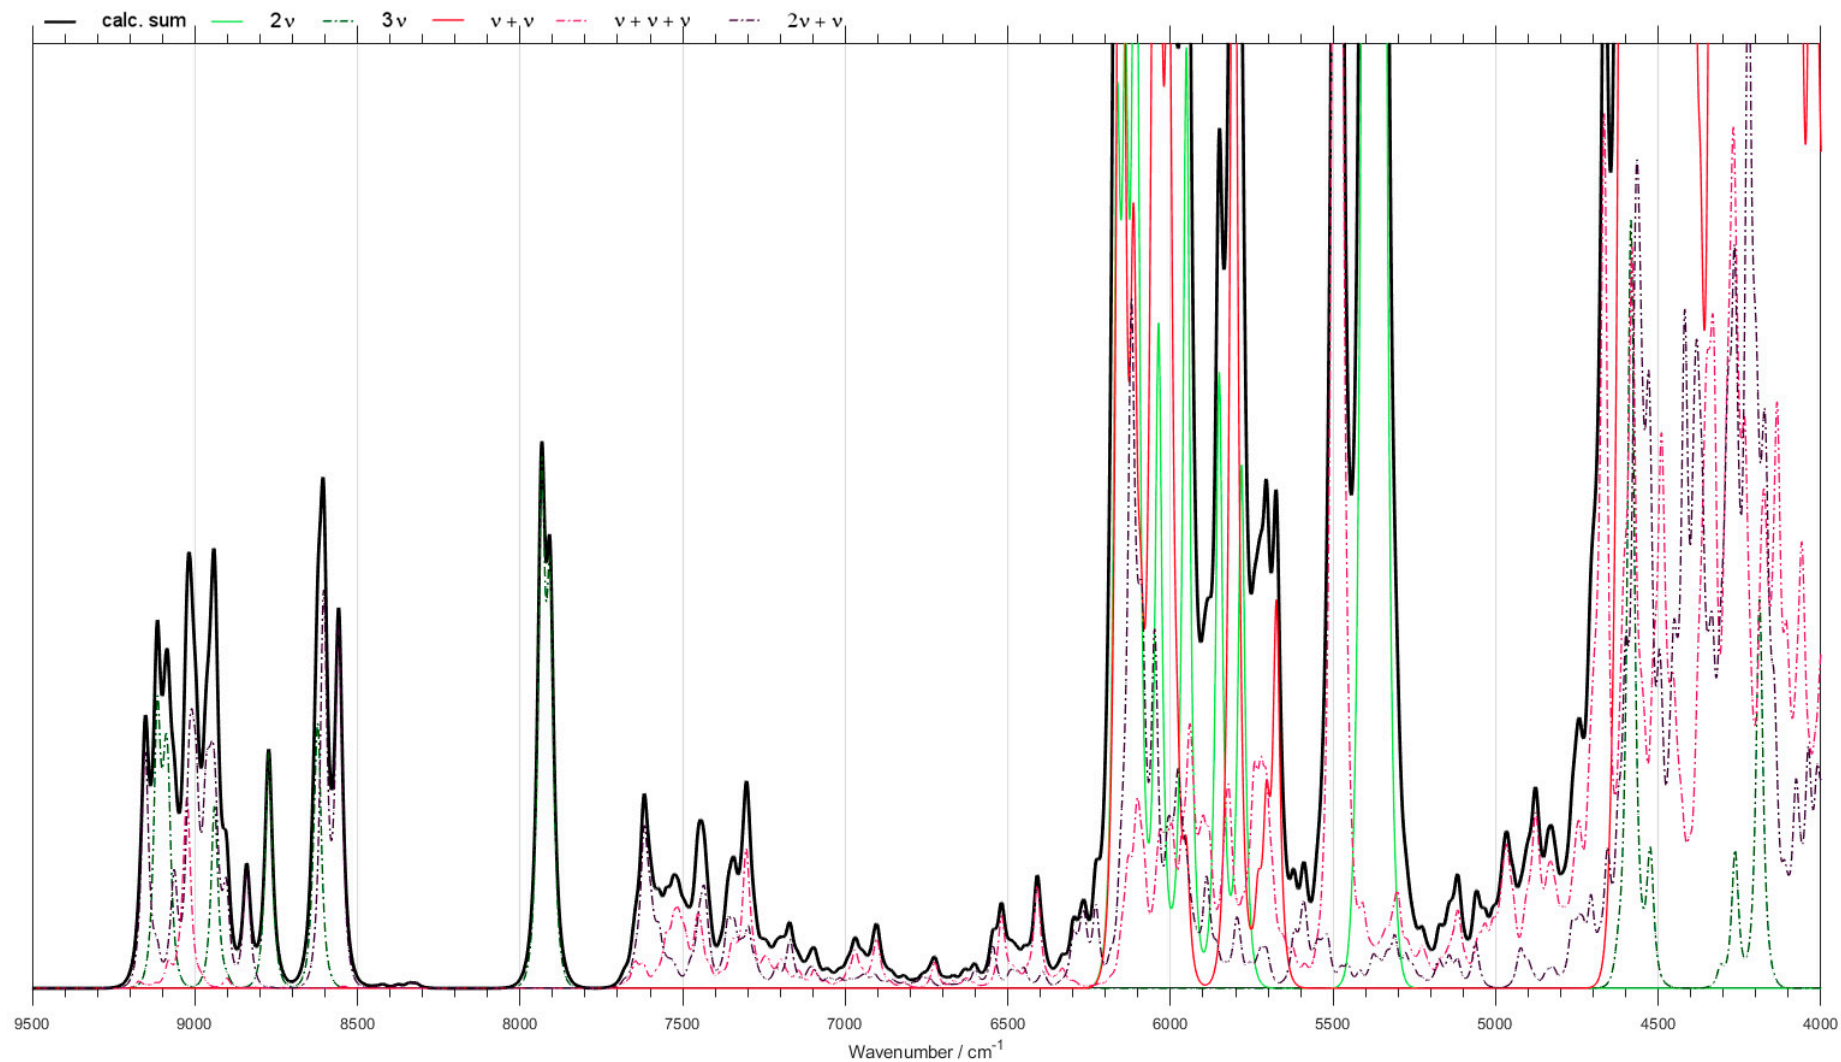

Figure S32. (High-resolution copy of Figure 4) Contributions from minor bands in NIR spectra of  $\text{CH}_3\text{CH}_2\text{OD}$  calculated with GVPT2 method at MP2/6-31G(d,p)//CPCM level of electronic theory.

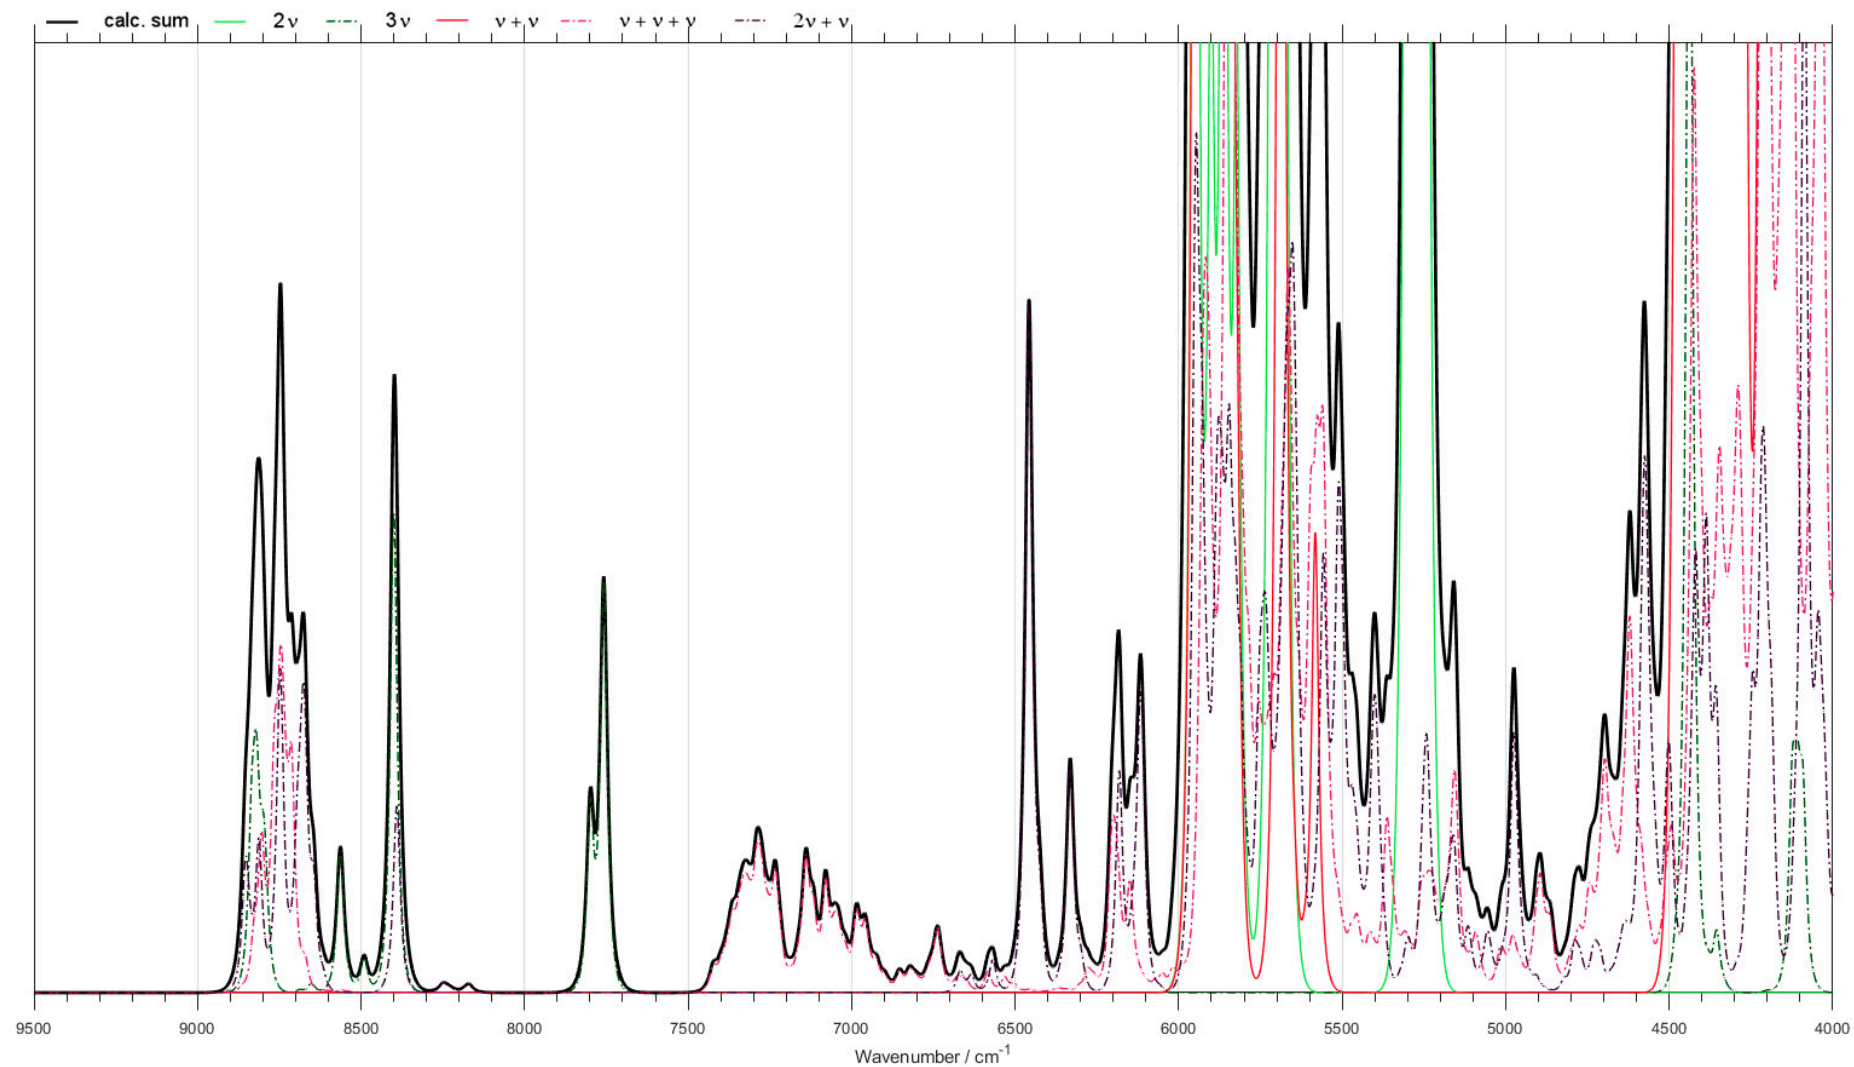

Figure S33. (High-resolution copy of Figure 4) Contributions from minor bands in NIR spectra of  $\text{CH}_3\text{CH}_2\text{OD}$  calculated with GVPT2 method at B3LYP-GD3BJ/SNST//CPCM level of electronic theory.

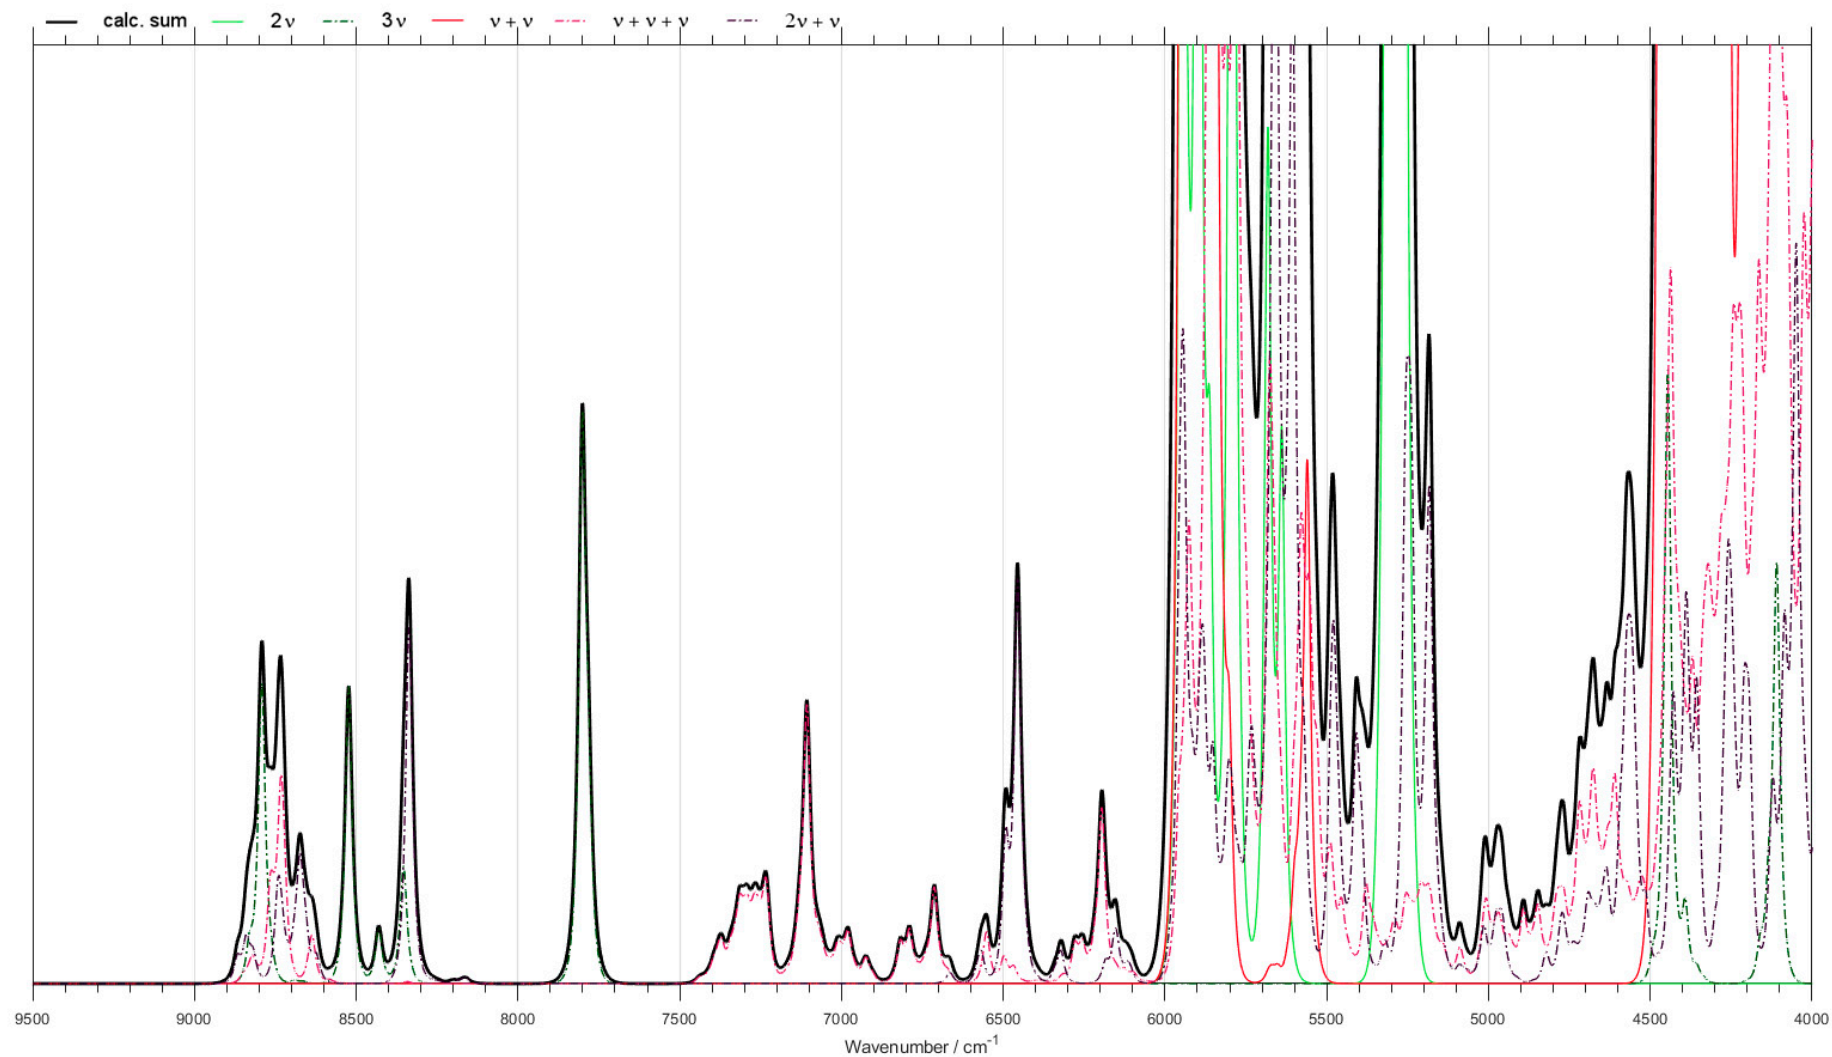

Figure S34. (High-resolution copy of Figure 4) Contributions from minor bands in NIR spectra of CH<sub>3</sub>CH<sub>2</sub>OD calculated with GVPT2 method at B2PLYP-GD3BJ/def2-TZVP//CPCM level of electronic theory.

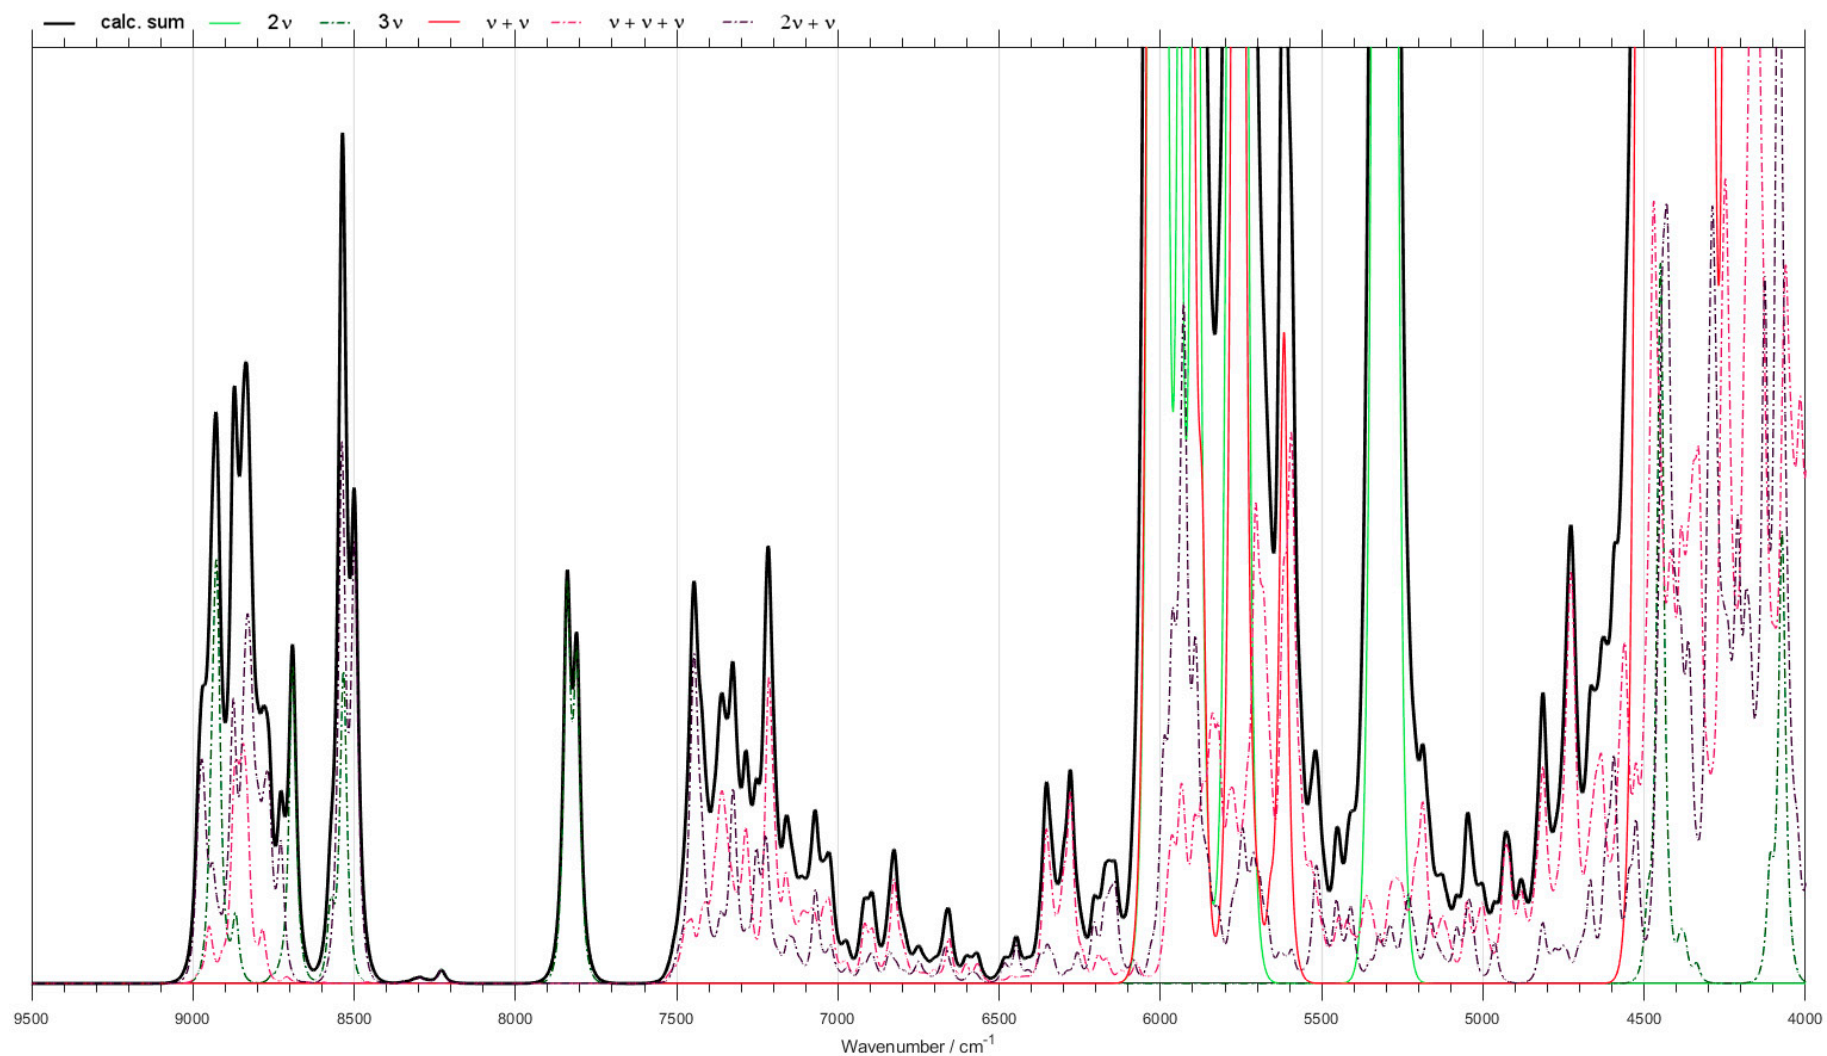

Figure S35. (High-resolution copy of Figure 4) Contributions from minor bands in NIR spectra of  $\text{CH}_3\text{CH}_2\text{OD}$  calculated with GVPT2 method at MP2/aug-cc-pVTZ//CPCM level of electronic theory.

## II. Tables

**Table S1.** The relative abundances of gauche (*g*) and trans (*t*) conformers for ethanol isotopomers calculated by different methods.

| Conf.                              |          | Calculated abundance  |                                     |                                |                             |                                          |                                         |                                         |
|------------------------------------|----------|-----------------------|-------------------------------------|--------------------------------|-----------------------------|------------------------------------------|-----------------------------------------|-----------------------------------------|
|                                    |          | MP2<br>/aVTZ<br>+CPCM | B2PLYP-GD3BJ<br>/def2-TZVP<br>+CPCM | B2PLYP-GD3BJ<br>/SNST<br>+CPCM | MP2<br>/6-31G(d,p)<br>+CPCM | B2PLYP-<br>GD3BJ<br>/6-31G(d,p)<br>+CPCM | B3LYP-<br>GD3BJ<br>/6-31G(d,p)<br>+CPCM | B3LYP-<br>GD3BJ<br>/6-31G(d,p)<br>+CPCM |
| CH <sub>3</sub> CH <sub>2</sub> OH | <i>g</i> | 45%                   | 37%                                 | 82%                            | 40%                         | 87%                                      | 74%                                     | 79%                                     |
|                                    | <i>t</i> | 55%                   | 63%                                 | 18%                            | 60%                         | 13%                                      | 26%                                     | 21%                                     |
| CH <sub>3</sub> CH <sub>2</sub> OD | <i>g</i> | 48%                   | 24%                                 | 73%                            | 46%                         | 78%                                      | 76%                                     | 79%                                     |
|                                    | <i>t</i> | 52%                   | 76%                                 | 27%                            | 54%                         | 22%                                      | 24%                                     | 21%                                     |
| CH <sub>3</sub> CD <sub>2</sub> OH | <i>g</i> | 47%                   | 38%                                 | 83%                            | 44%                         | 87%                                      | 74%                                     | 79%                                     |
|                                    | <i>t</i> | 53%                   | 62%                                 | 17%                            | 56%                         | 13%                                      | 26%                                     | 21%                                     |
| CD <sub>3</sub> CH <sub>2</sub> OH | <i>g</i> | 60%                   | 51%                                 | 83%                            | 52%                         | 88%                                      | 73%                                     | 79%                                     |
|                                    | <i>t</i> | 40%                   | 49%                                 | 17%                            | 48%                         | 12%                                      | 27%                                     | 21%                                     |
| CD <sub>3</sub> CD <sub>2</sub> OH | <i>g</i> | 58%                   | 51%                                 | 84%                            | 54%                         | 87%                                      | 73%                                     | 79%                                     |
|                                    | <i>t</i> | 42%                   | 49%                                 | 16%                            | 46%                         | 13%                                      | 27%                                     | 21%                                     |
| CD <sub>3</sub> CD <sub>2</sub> OD | <i>g</i> | 51%                   | 37%                                 | 69%                            | 53%                         | 80%                                      | 77%                                     | 79%                                     |
|                                    | <i>t</i> | 49%                   | 63%                                 | 31%                            | 47%                         | 20%                                      | 23%                                     | 21%                                     |
| CH <sub>3</sub> CD <sub>2</sub> OD | <i>g</i> | 48%                   | 24%                                 | 73%                            | 46%                         | 79%                                      | 76%                                     | 79%                                     |
|                                    | <i>t</i> | 52%                   | 76%                                 | 27%                            | 54%                         | 21%                                      | 24%                                     | 21%                                     |
| CD <sub>3</sub> CH <sub>2</sub> OD | <i>g</i> | 50%                   | 35%                                 | 70%                            | 52%                         | 80%                                      | 77%                                     | 79%                                     |
|                                    | <i>t</i> | 50%                   | 65%                                 | 30%                            | 48%                         | 20%                                      | 23%                                     | 21%                                     |

**Table S2.** Potential energy distribution (PED) for *trans* and *gauche* conformers of ethanol (CH<sub>3</sub>CH<sub>2</sub>OH) based on B2PLYP-GD3BJ/def2-TZVP//CPCM calculations.

### *trans*

| $\nu$ [cm <sup>-1</sup> ] | %   | Int. coord.            | %   | Int. coord.         | %   | Int. coord.          | %   | Int. coord.            | %  | Int. coord.         |
|---------------------------|-----|------------------------|-----|---------------------|-----|----------------------|-----|------------------------|----|---------------------|
| 240.08                    | 53% | $\tau_{CC}$            | 45% | $\delta_{oop}COH$   |     |                      |     |                        |    |                     |
| 282.43                    | 53% | $\delta_{oop}COH$      | 42% | $\tau_{CC}$         |     |                      |     |                        |    |                     |
| 420.77                    | 78% | $\delta_{sciss}CH_2CO$ | 12% | $\delta_{rock}CH_3$ |     |                      |     |                        |    |                     |
| 826.43                    | 40% | $\delta_{rock}CH_2$    | 33% | $\delta_{rock}CH_3$ | 13% | $\delta_{twist}CH_2$ | 11% | $\delta_{rock}CH_3$    |    |                     |
| 904.94                    | 38% | $\nu_{C-O}$            | 24% | $\nu_{CC}$          | 21% | $\delta_{rock}CH_3$  | 7%  | $\delta_{rock}CH_3$    | 6% | $\delta_{wagg}CH_2$ |
| 1045.00                   | 49% | $\nu_{CC}$             | 21% | $\delta_{ip}COH$    | 14% | $\nu_{C-O}$          | 8%  | $\delta_{rock}CH_3$    |    |                     |
| 1105.80                   | 54% | $\nu_{C-O}$            | 22% | $\delta_{rock}CH_3$ | 8%  | $\delta_{rock}CH_3$  | 5%  | $\delta_{sciss}CH_2CO$ |    |                     |











**Table S5. Potential energy distribution (PED) for *trans* and *gauche* conformers of ethanol-*d*<sub>3</sub> (CD<sub>3</sub>CH<sub>2</sub>OH) based on B2PLYP-GD3BJ/def2-TZVP//CPCM calculations.***trans*

| $\nu$ [cm <sup>-1</sup> ] | %    | Int. coord.            | %   | Int. coord.          | %   | Int. coord.            | %   | Int. coord.          | %  | Int. coord.         |
|---------------------------|------|------------------------|-----|----------------------|-----|------------------------|-----|----------------------|----|---------------------|
| 192.63                    | 85%  | $\tau_{CC}$            | 10% | $\delta_{oop}COH$    |     |                        |     |                      |    |                     |
| 266.42                    | 95%  | $\delta_{oop}COH$      |     |                      |     |                        |     |                      |    |                     |
| 376.32                    | 70%  | $\delta_{sciss}CH_2CO$ | 18% | $\delta_{rock}CD_3$  | 6%  | $\delta_{rock}CD_3$    |     |                      |    |                     |
| 683.12                    | 48%  | $\delta_{rock}CD_3$    | 23% | $\delta_{rock}CH_2$  | 16% | $\delta_{rock}CD_3$    | 9%  | $\delta_{twist}CH_2$ |    |                     |
| 770.55                    | 40%  | $\delta_{rock}CD_3$    | 19% | $\nu_{C-O}$          | 14% | $\nu_{CC}$             | 14% | $\delta_{rock}CD_3$  |    |                     |
| 934.38                    | 34%  | $\nu_{CC}$             | 31% | $\delta_sCD_3$       | 10% | $\delta_{sciss}CH_2CO$ | 10% | $\delta_{ip}COH$     | 9% | $\delta_{rock}CD_3$ |
| 1061.99                   | 63%  | $\nu_{C-O}$            | 17% | $\delta_{as}CD_3$    | 6%  | $\delta_{sciss}CH_2CO$ | 6%  | $\delta_{as}CD_3$    |    |                     |
| 1072.32                   | 72%  | $\delta_{as}CD_3$      | 24% | $\delta_{as}CD_3$    |     |                        |     |                      |    |                     |
| 1090.74                   | 54%  | $\delta_{as}CD_3$      | 18% | $\delta_{as}CD_3$    | 16% | $\nu_{C-O}$            | 5%  | $\delta_{rock}CD_3$  |    |                     |
| 1125.48                   | 79%  | $\delta_{rock}CH_2$    | 15% | $\delta_{rock}CD_3$  |     |                        |     |                      |    |                     |
| 1154.80                   | 48%  | $\delta_sCD_3$         | 33% | $\nu_{CC}$           | 11% | $\delta_{ip}COH$       | 6%  | $\nu_{C-O}$          |    |                     |
| 1257.45                   | 59%  | $\delta_{ip}COH$       | 25% | $\delta_{twist}CH_2$ | 6%  | $\nu_{CC}$             |     |                      |    |                     |
| 1284.71                   | 96%  | $\delta_{twist}CH_2$   |     |                      |     |                        |     |                      |    |                     |
| 1459.15                   | 72%  | $\delta_{wagg}CH_2$    | 15% | $\delta_{ip}COH$     | 10% | $\nu_{CC}$             |     |                      |    |                     |
| 1538.68                   | 95%  | $\delta_{sciss}CH_2$   |     |                      |     |                        |     |                      |    |                     |
| 2197.73                   | 99%  | $\nu_sCD_3$            |     |                      |     |                        |     |                      |    |                     |
| 2320.27                   | 98%  | $\nu_{as}CD_3$         |     |                      |     |                        |     |                      |    |                     |
| 2322.02                   | 98%  | $\nu_{as}CD_3$         |     |                      |     |                        |     |                      |    |                     |
| 3016.88                   | 100% | $\nu_sCH_2$            |     |                      |     |                        |     |                      |    |                     |
| 3049.95                   | 100% | $\nu_{as}CH_2$         |     |                      |     |                        |     |                      |    |                     |
| 3821.81                   | 100% | $\nu_{OH}$             |     |                      |     |                        |     |                      |    |                     |

*gauche*

| $\nu$ [cm <sup>-1</sup> ] | %   | Int. coord.            | %   | Int. coord.         | %   | Int. coord.            | %   | Int. coord.          | %   | Int. coord.         |
|---------------------------|-----|------------------------|-----|---------------------|-----|------------------------|-----|----------------------|-----|---------------------|
| 204.58                    | 94% | $\tau_{CC}$            |     |                     |     |                        |     |                      |     |                     |
| 287.82                    | 89% | $\delta_{oop}COH$      |     |                     |     |                        |     |                      |     |                     |
| 382.13                    | 66% | $\delta_{sciss}CH_2CO$ | 21% | $\delta_{rock}CD_3$ |     |                        |     |                      |     |                     |
| 677.65                    | 49% | $\delta_{rock}CD_3$    | 25% | $\delta_{rock}CH_2$ | 13% | $\delta_{rock}CD_3$    | 9%  | $\delta_{twist}CH_2$ |     |                     |
| 761.11                    | 40% | $\delta_{rock}CD_3$    | 20% | $\nu_{CC}$          | 16% | $\nu_{C-O}$            | 12% | $\delta_{rock}CD_3$  | 6%  | $\delta_sCD_3$      |
| 950.19                    | 33% | $\delta_sCD_3$         | 28% | $\nu_{CC}$          | 13% | $\delta_{sciss}CH_2CO$ | 11% | $\delta_{rock}CD_3$  | 6%  | $\delta_{rock}CD_3$ |
|                           | 6%  | $\delta_{ip}COH$       |     |                     |     |                        |     |                      |     |                     |
| 1038.09                   | 42% | $\nu_{C-O}$            | 21% | $\delta_{ip}COH$    | 20% | $\delta_{rock}CH_2$    | 6%  | $\delta_{rock}CD_3$  | 6%  | $\delta_sCD_3$      |
| 1073.56                   | 78% | $\delta_{as}CD_3$      | 11% | $\delta_{rock}CH_2$ | 7%  | $\nu_{C-O}$            |     |                      |     |                     |
| 1076.18                   | 69% | $\delta_{as}CD_3$      | 9%  | $\delta_{rock}CH_2$ | 7%  | $\nu_{C-O}$            | 5%  | $\delta_{rock}CD_3$  |     |                     |
| 1092.43                   | 28% | $\nu_{C-O}$            | 25% | $\delta_{as}CD_3$   | 15% | $\delta_{as}CD_3$      | 14% | $\delta_{rock}CH_2$  | 13% | $\delta_{rock}CD_3$ |
| 1163.57                   | 50% | $\delta_sCD_3$         | 44% | $\nu_{CC}$          |     |                        |     |                      |     |                     |
| 1247.02                   | 55% | $\delta_{twist}CH_2$   | 30% | $\delta_{ip}COH$    | 7%  | $\delta_{rock}CH_2$    | 5%  | $\delta_{rock}CD_3$  |     |                     |
| 1378.71                   | 33% | $\delta_{twist}CH_2$   | 29% | $\delta_{ip}COH$    | 27% | $\delta_{wagg}CH_2$    | 5%  | $\delta_{rock}CH_2$  |     |                     |



|         |      |                        |     |                     |     |                      |     |                        |     |                        |
|---------|------|------------------------|-----|---------------------|-----|----------------------|-----|------------------------|-----|------------------------|
| 286.11  | 91%  | $\delta_{oop}COH$      |     |                     |     |                      |     |                        |     |                        |
| 377.64  | 66%  | $\delta_{sciss}CD_2CO$ | 20% | $\delta_{rock}CD_3$ |     |                      |     |                        |     |                        |
| 595.93  | 38%  | $\delta_{rock}CD_2$    | 35% | $\delta_{rock}CD_3$ | 15% | $\delta_{twist}CD_2$ | 10% | $\delta_{rock}CD_3$    |     |                        |
| 744.86  | 34%  | $\delta_{rock}CD_3$    | 24% | vCC                 | 11% | vC-O                 | 11% | d $\delta_{wagg}CH_2$  | 11% | $\delta_{rock}CD_3$    |
|         | 6%   | $\delta_sCD_3$         |     |                     |     |                      |     |                        |     |                        |
| 894.42  | 38%  | $\delta_{twist}CD_2$   | 24% | $\delta_{rock}CD_2$ | 15% | $\delta_{ip}COH$     | 9%  | $\delta_{rock}CD_3$    |     |                        |
| 918.78  | 17%  | vCC                    | 16% | $\delta_{rock}CD_3$ | 14% | $\delta_sCD_3$       | 11% | $\delta_{twist}CD_2$   | 11% | $\delta_{sciss}CD_2CO$ |
|         | 8%   | $\delta_{sciss}CD_2$   | 7%  | vC-O                | 6%  | $\delta_{rock}CD_2$  | 5%  | d $\delta_{wagg}CD_2$  |     |                        |
| 981.92  | 48%  | vC-O                   | 18% | $\delta_{wagg}CD_2$ | 12% | $\delta_{twist}CD_2$ | 7%  | $\delta_{sciss}CD_2CO$ |     |                        |
| 1000.98 | 29%  | $\delta_{twist}CD_2$   | 25% | $\delta_{rock}CD_3$ | 22% | $\delta_{rock}CD_2$  | 12% | $\delta_{rock}CD_3$    | 5%  | vC-O                   |
| 1076.06 | 65%  | $\delta_{as}CD_3$      | 31% | $\delta_{as}CD_3$   |     |                      |     |                        |     |                        |
| 1080.46 | 58%  | $\delta_{as}CD_3$      | 29% | $\delta_{as}CD_3$   | 7%  | $\delta_{sciss}CD_2$ |     |                        |     |                        |
| 1097.28 | 42%  | $\delta_sCD_3$         | 23% | $\delta_{wagg}CD_2$ | 18% | $\delta_{sciss}CD_2$ | 7%  | vC-O                   | 6%  | $\delta_{as}CD_3$      |
| 1143.62 | 57%  | $\delta_{sciss}CD_2$   | 19% | vC-O                | 7%  | $\delta_{wagg}CD_2$  | 5%  | $\delta_{rock}CD_3$    |     |                        |
| 1206.44 | 39%  | vCC                    | 28% | $\delta_{wagg}CD_2$ | 16% | $\delta_sCD_3$       | 14% | vC-O                   |     |                        |
| 1319.55 | 86%  | $\delta_{ip}COH$       |     |                     |     |                      |     |                        |     |                        |
| 2189.05 | 96%  | $\nu_sCD_3$            |     |                     |     |                      |     |                        |     |                        |
| 2208.19 | 95%  | $\nu_sCD_2$            |     |                     |     |                      |     |                        |     |                        |
| 2298.37 | 55%  | $\nu_{as}CD_2$         | 42% | $\nu_{as}CD_3$      |     |                      |     |                        |     |                        |
| 2310.52 | 67%  | $\nu_{as}CD_3$         | 29% | $\nu_{as}CD_2$      |     |                      |     |                        |     |                        |
| 2321.35 | 86%  | $\nu_{as}CD_3$         | 9%  | $\nu_{as}CD_2$      |     |                      |     |                        |     |                        |
| 3808.76 | 100% | $\nu OH$               |     |                     |     |                      |     |                        |     |                        |

**Table S7. Potential energy distribution (PED) for *trans* and *gauche* conformers of ethanol-*d*<sub>6</sub> (CD<sub>3</sub>CD<sub>2</sub>OD) based on B2PLYP-GD3BJ/def2-TZVP//CPCM calculations.**

*trans*

| $\nu$ [cm <sup>-1</sup> ] | %   | Int. coord.            | %   | Int. coord.         | %   | Int. coord.          | %   | Int. coord.            | %   | Int. coord.         |
|---------------------------|-----|------------------------|-----|---------------------|-----|----------------------|-----|------------------------|-----|---------------------|
| 179.69                    | 53% | $\tau_{CC}$            | 45% | $\delta_{oop}COD$   |     |                      |     |                        |     |                     |
| 204.12                    | 52% | $\delta_{oop}COD$      | 44% | $\tau_{CC}$         |     |                      |     |                        |     |                     |
| 364.00                    | 70% | $\delta_{sciss}CD_2CO$ | 17% | $\delta_{rock}CD_3$ | 6%  | $\delta_{rock}CD_3$  |     |                        |     |                     |
| 601.58                    | 35% | $\delta_{rock}CD_2$    | 35% | $\delta_{rock}CD_3$ | 16% | $\delta_{twist}CD_2$ | 11% | $\delta_{rock}CD_3$    |     |                     |
| 751.58                    | 35% | $\delta_{rock}CD_3$    | 15% | vCC                 | 14% | $\delta_{wagg}CD_2$  | 13% | vC-O                   | 12% | $\delta_{rock}CD_3$ |
| 828.13                    | 56% | $\delta_{ip}COD$       | 21% | vCC                 | 7%  | $\delta_sCD_3$       |     |                        |     |                     |
| 928.30                    | 71% | $\delta_{twist}CD_2$   | 25% | $\delta_{rock}CD_2$ |     |                      |     |                        |     |                     |
| 929.81                    | 27% | vC-O                   | 27% | $\delta_{wagg}CD_2$ | 11% | $\delta_sCD_3$       | 10% | vCC                    | 8%  | $\delta_{rock}CD_3$ |
|                           | 5%  | $\delta_{ip}COD$       |     |                     |     |                      |     |                        |     |                     |
| 1005.34                   | 38% | $\delta_{rock}CD_2$    | 33% | $\delta_{rock}CD_3$ | 17% | $\delta_{twist}CD_2$ | 11% | $\delta_{rock}CD_3$    |     |                     |
| 1040.69                   | 37% | vC-O                   | 22% | $\delta_{ip}COD$    | 19% | $\delta_{sciss}CD_2$ | 12% | $\delta_{sciss}CD_2CO$ |     |                     |
| 1074.86                   | 72% | $\delta_{as}CD_3$      | 24% | $\delta_{as}CD_3$   |     |                      |     |                        |     |                     |
| 1083.27                   | 67% | $\delta_{as}CD_3$      | 22% | $\delta_{as}CD_3$   | 6%  | $\delta_{sciss}CD_2$ |     |                        |     |                     |
| 1104.25                   | 60% | $\delta_sCD_3$         | 21% | $\delta_{wagg}CD_2$ | 5%  | $\delta_{sciss}CD_2$ |     |                        |     |                     |



**Table S8. Potential energy distribution (PED) for *trans* and *gauche* conformers of CH<sub>3</sub>CD<sub>2</sub>OD based on B2PLYP-GD3BJ/def2-TZVP//CPCM calculations.***trans*

| v [cm <sup>-1</sup> ] | %    | Int. coord.            | %   | Int. coord.          | %   | Int. coord.            | %   | Int. coord.          | %  | Int. coord.          |
|-----------------------|------|------------------------|-----|----------------------|-----|------------------------|-----|----------------------|----|----------------------|
| 190.00                | 89%  | $\delta_{oop}COD$      | 11% | $\tau_{CC}$          |     |                        |     |                      |    |                      |
| 258.77                | 92%  | $\tau_{CC}$            |     |                      |     |                        |     |                      |    |                      |
| 406.06                | 77%  | $\delta_{sciss}CD_2CO$ | 11% | $\delta_{rock}CH_3$  |     |                        |     |                      |    |                      |
| 692.37                | 48%  | $\delta_{rock}CD_2$    | 23% | $\delta_{twist}CD_2$ | 20% | $\delta_{rock}CH_3$    | 7%  | $\delta_{rock}CH_3$  |    |                      |
| 852.44                | 68%  | $\delta_{ip}COD$       | 14% | $\delta_{wagg}CD_2$  | 10% | $\nu_{CC}$             |     |                      |    |                      |
| 867.18                | 30%  | $\nu_{CC}$             | 26% | $\delta_{wagg}CD_2$  | 18% | $\nu_{C-O}$            | 16% | $\delta_{rock}CH_3$  | 6% | $\delta_{rock}CH_3$  |
| 929.51                | 71%  | $\delta_{twist}CD_2$   | 26% | $\delta_{rock}CD_2$  |     |                        |     |                      |    |                      |
| 988.62                | 61%  | $\nu_{C-O}$            | 12% | $\nu_{CC}$           | 10% | $\delta_{ip}COD$       | 9%  | $\delta_{wagg}CD_2$  | 5% | $\delta_{rock}CH_3$  |
| 1083.26               | 61%  | $\delta_{sciss}CD_2$   | 13% | $\delta_{rock}CH_3$  | 11% | $\delta_{sciss}CD_2CO$ | 7%  | $\delta_{ip}COD$     |    |                      |
| 1152.60               | 50%  | $\delta_{rock}CH_3$    | 17% | $\delta_{rock}CD_2$  | 16% | $\delta_{rock}CH_3$    | 9%  | $\delta_{twist}CD_2$ | 6% | $\delta_{as}CH_3$    |
| 1187.81               | 32%  | $\delta_{sciss}CD_2$   | 23% | $\nu_{C-O}$          | 19% | $\delta_{rock}CH_3$    | 10% | $\delta_{wagg}CD_2$  | 7% | $\delta_{rock}CH_3$  |
| 1233.96               | 42%  | $\delta_{wagg}CD_2$    | 33% | $\nu_{CC}$           | 10% | $\delta_{ip}COD$       | 7%  | $\nu_{C-O}$          | 5% | $\delta_{sciss}CD_2$ |
| 1420.81               | 88%  | $\delta_sCH_3$         | 10% | $\nu_{CC}$           |     |                        |     |                      |    |                      |
| 1490.98               | 69%  | $\delta_{as}CH_3$      | 23% | $\delta_{as}CH_3$    | 6%  | $\delta_{rock}CH_3$    |     |                      |    |                      |
| 1508.99               | 68%  | $\delta_{as}CH_3$      | 22% | $\delta_{as}CH_3$    | 6%  | $\delta_{rock}CH_3$    |     |                      |    |                      |
| 2191.79               | 98%  | $\nu_sCD_2$            |     |                      |     |                        |     |                      |    |                      |
| 2266.51               | 98%  | $\nu_{as}CD_2$         |     |                      |     |                        |     |                      |    |                      |
| 2782.50               | 100% | $\nu_{OD}$             |     |                      |     |                        |     |                      |    |                      |
| 3058.30               | 100% | $\nu_sCH_3$            |     |                      |     |                        |     |                      |    |                      |
| 3132.15               | 100% | $\nu_{as}CH_3$         |     |                      |     |                        |     |                      |    |                      |
| 3133.16               | 100% | $\nu_{as}CH_3$         |     |                      |     |                        |     |                      |    |                      |

*gauche*

| v [cm <sup>-1</sup> ] | %   | Int. coord.            | %   | Int. coord.          | %   | Int. coord.          | %   | Int. coord.          | %  | Int. coord.            |
|-----------------------|-----|------------------------|-----|----------------------|-----|----------------------|-----|----------------------|----|------------------------|
| 212.69                | 96% | $\delta_{oop}COD$      |     |                      |     |                      |     |                      |    |                        |
| 264.92                | 93% | $\tau_{CC}$            |     |                      |     |                      |     |                      |    |                        |
| 412.62                | 76% | $\delta_{sciss}CD_2CO$ | 13% | $\delta_{rock}CH_3$  |     |                      |     |                      |    |                        |
| 675.84                | 56% | $\delta_{rock}CD_2$    | 16% | $\delta_{rock}CH_3$  | 14% | $\delta_{twist}CD_2$ | 7%  | $\delta_{rock}CH_3$  |    |                        |
| 828.91                | 44% | $\delta_{ip}COD$       | 38% | $\delta_{twist}CD_2$ | 11% | $\delta_{rock}CH_3$  |     |                      |    |                        |
| 858.49                | 37% | $\nu_{CC}$             | 20% | $\delta_{wagg}CD_2$  | 17% | $\delta_{rock}CH_3$  | 16% | $\nu_{C-O}$          |    |                        |
| 976.66                | 69% | $\nu_{C-O}$            | 25% | $\delta_{wagg}CD_2$  |     |                      |     |                      |    |                        |
| 1021.81               | 28% | $\delta_{twist}CD_2$   | 22% | $\delta_{ip}COD$     | 12% | $\nu_{CC}$           | 9%  | $\delta_{rock}CH_3$  | 9% | $\delta_{rock}CH_3$    |
|                       | 8%  | $\delta_{rock}CD_2$    | 7%  | $\delta_{sciss}CD_2$ |     |                      |     |                      |    |                        |
| 1068.48               | 49% | $\delta_{sciss}CD_2$   | 14% | $\delta_{rock}CH_3$  | 12% | $\delta_{ip}COD$     | 9%  | $\delta_{twist}CD_2$ | 8% | $\delta_{sciss}CD_2CO$ |
| 1151.99               | 30% | $\delta_{rock}CH_3$    | 19% | $\delta_{rock}CH_3$  | 15% | $\delta_{sciss}CD_2$ | 14% | $\delta_{rock}CD_2$  | 7% | $\nu_{CC}$             |
|                       | 5%  | $\delta_{twist}CD_2$   | 5%  | $\delta_{as}CH_3$    |     |                      |     |                      |    |                        |
